# Supplementary material
Source: publisher figshare collection journal article supplement (https://gsajournals.figshare.com/ndownloader/files/23856845)
Supplement: Supplementary file 1 [file 23856845]

## Sheet: sheet1
Chrom	Pos	sperm	oocyte	8cell	morula	ICM	pgc7wm	pgc10wm	pgc10wf	pgc11wm	pgc11wf	pgc13wm	pgc17wf	pgc19wm	CpG_snp
chr1	10691	0	0	0	0	0	0	0.285714	0	0	0	0	0	0	0
chr1	14773	0.921875	0.571429	0.416667	0	0.5	0.4	0.521739	0	0.347826	0.296296	0.222222	0.153846	0	0
chr1	14775	0.968254	0.583333	0.461538	0.428571	0.318182	0.772727	0.565217	0.454545	0.269231	0.423077	0.25	0.37037	0	1
chr1	14791	0.909091	0.5	0.384615	0.307692	0.5	0.777778	0.576923	0.333333	0.37037	0.5	0.285714	0.242424	0.25	0
chr1	14888	1	0.333333	0.307692	0	0.3	0.709677	0.806452	0.333333	0.423077	0.62963	0	0.583333	0.333333	0
chr1	15513	0.953125	0.8	0.888889	0.615385	0.166667	0.444444	0.545455	0.363636	0.266667	0.571429	0.545455	0.72	0	0
chr1	15526	0.984127	0.8	0.6	0.666667	0.296296	0.7	0.818182	0.3	0.352941	0.555556	0.357143	0.678571	0.363636	0
chr1	16555	1	0.833333	0.6	0	0.388889	0.25	0.25	0	0	0.130435	0	0	0	0
chr1	16822	0.961538	1	0.642857	0.636364	0.583333	0.444444	0.375	0.461538	0.22449	0.520548	0.354167	0.4	0.433962	0
chr1	17452	0.948454	0.909091	0.3	0.352941	0.40625	0.333333	0.411765	0.285714	0	0.1875	0	0	0	0
chr1	17478	0.969697	1	0.6	0.55	0.516129	0.266667	0.206897	0	0	0.136364	0	0.15	0	0
chr1	17483	0.945578	1	0.5	0.470588	0.515152	0.264706	0.222222	0	0	0	0	0	0	0
chr1	17492	0.98773	0.857143	0.4	0.545455	0.580645	0.241379	0.258065	0	0	0.142857	0	0	0	0
chr1	17562	0.990291	0.875	0.6	0.642857	0.555556	0.307692	0	0.333333	0	0.333333	0	0	0	0
chr1	17571	0.965517	0.857143	0.5	0.714286	0.4	0.3	0.272727	0	0	0	0	0	0	1
chr1	17584	0.944444	1	0.4	0.785714	0.733333	0.3	0.4	0	0	0	0	0	0	0
chr1	133391	0.806452	0.666667	0.307692	0.166667	0.166667	0	0	0	0	0	0	0.190476	0	0
chr1	133424	1	1	0.307692	0.190476	0.2	0	0	0	0	0	0	0	0	0
chr1	133433	0.945455	1	0.538462	0.263158	0	0	0	0	0	0	0	0	0	1
chr1	135125	0.947368	0	0	0.277778	0	0.285714	0	0	0.285714	0.333333	0	0.36	0	0
chr1	135135	0.925	0	0.25	0.1875	0	0	0	0	0	0	0	0.178571	0	1
chr1	135150	1	0	0.230769	0.214286	0	0	0.333333	0	0	0	0	0.125	0	0
chr1	135161	1	0	0.214286	0.4	0	0.259259	0.352941	0	0	0	0	0.125	0	0
chr1	135178	1	0	0	0.2	0	0	0.16	0	0	0	0	0.170732	0	0
chr1	135190	0.977778	0	0	0.2	0	0	0.185185	0	0	0.16	0	0.142857	0	0
chr1	135202	0.981481	0	0	0.277778	0.333333	0.24	0.3	0	0	0.148148	0	0.301887	0	0
chr1	135207	0.924528	0	0	0.222222	0	0.122449	0.119048	0	0	0	0	0.122807	0	0
chr1	135217	0.979592	0	0	0.315789	0	0.0909091	0.142857	0	0	0	0	0.188679	0	0
chr1	136423	0.975904	0	0	0.272727	0	0.354839	0	0	0	0	0.333333	0	0	0
chr1	136827	0.934132	0	0.666667	0.222222	0.583333	0.388889	0.1875	0.285714	0	0	0	0.304348	0	0
chr1	136846	0.96875	0	0.4	0	0.416667	0.0983607	0	0	0	0	0	0	0	1
chr1	136864	0.886667	0	0.666667	0	0.375	0.276596	0.0909091	0	0	0	0	0.178571	0	0
chr1	136876	0.886364	0	0.625	0.230769	0.5	0.390244	0.265625	0	0	0	0	0.24	0	0
chr1	136895	0.938053	0	0.375	0.25	0.363636	0.136364	0	0	0	0	0	0	0	0
chr1	136913	0.722222	0	0.5	0.363636	0.428571	0.222222	0.133333	0	0	0	0	0.166667	0	0
chr1	136944	0.867769	0	0.428571	0	0.375	0.291667	0.105263	0	0	0	0	0	0	0
chr1	138781	0.965517	0.25	0.166667	0.217391	0.181818	0	0.102041	0	0	0	0	0	0	1
chr1	139029	0.98913	0.333333	0.352941	0.5	0.166667	0.297297	0.0952381	0	0	0	0	0.148936	0	1
chr1	139059	0.969466	0.363636	0.35	0.307692	0	0.173913	0	0	0	0	0	0	0	0
chr1	139073	0.984252	0.8	0.35	0.307692	0.16	0.285714	0	0	0	0	0	0.0909091	0	0
chr1	139320	0.979798	0.75	0.192308	0.266667	0.269231	0.189873	0	0	0	0.177419	0	0.180851	0	1
chr1	235696	0.458333	0.692308	0.318182	0.444444	0.193548	0	0	0	0	0	0	0	0	0
chr1	235774	0.513514	0.888889	0.5625	0.565217	0.37037	0	0	0	0	0	0	0	0	0
chr1	546778	0.657895	1	0.7	0.6875	0.666667	0.881356	0.5	1	0.736842	0.75	0.846154	0.939394	0.636364	0
chr1	546822	0.147059	0.625	0	0.388889	0.3125	0.146341	0	0	0	0	0.130435	0.166667	0	0
chr1	546852	0.414634	0.916667	0.666667	0.684211	0.533333	0.787879	1	0.714286	0.692308	0.678571	0.647059	0.705882	0.473684	0
chr1	546904	0.385965	0.9375	0.571429	0.529412	0.434783	0.810811	0.8	0.4	0.736842	0.666667	0.6	0.428571	0.647059	0
chr1	569081	1	0	0	0.0833333	0	1	1	1	1	1	1	1	1	0
chr1	569687	0.932203	0	0.117647	0.142857	0.275862	1	0.846154	1	0.846154	0.857143	1	0.857143	0.666667	0
chr1	569693	0.965517	0	0.104651	0.101266	0.25	1	0.962963	1	0.923077	0.857143	0.888889	0.888889	0.833333	0
chr1	569711	0.944444	0	0.0744681	0	0.193548	0.909091	0.807692	0.714286	0.7	0.777778	0.9	0.727273	0.666667	0
chr1	569744	0.935484	0	0.0973451	0.128713	0.323529	0.857143	0.857143	0.875	0.857143	0.888889	1	0.75	0.833333	1
chr1	569930	0.948718	0.00965909	0.0456853	0	0.114286	0.853933	0.85	0.931034	0.733333	0.886076	0.886364	0.838235	0.966667	0
chr1	569932	0.974359	0.0111982	0	0	0.106061	0.896552	0.865546	1	0.783784	0.948718	0.928571	0.888889	0.892857	1
chr1	569942	0.95	0.00962052	0	0	0.0921053	0.882353	0.801724	0.833333	0.805556	0.916667	0.911111	0.828571	0.862069	0
chr1	569993	0.970588	0.0104895	0	0	0.134146	0.875	0.809524	0.769231	0.866667	0.952941	0.84	0.775	0.916667	0
chr1	569998	0.971429	0.0148725	0	0	0.0769231	0.777778	0.772727	0.785714	0.8	0.823529	0.846154	0.767442	0.916667	0
chr1	570037	0.935484	0.00881489	0	0	0.155172	1	0.761905	0.818182	0.769231	0.885057	1	0.939394	1	0
chr1	672947	0.862069	0.4	0.608696	0.321429	0.243902	0	0	0	0	0	0	0	0	0
chr1	723701	0.954545	1	0.6	0.428571	0.75	0.875	0.692308	0.75	0.571429	0.833333	0.7	0.814815	0.6	0
chr1	725346	0.76087	0.833333	0.454545	0.5	0.555556	0.714286	0.666667	0.6	0.714286	0	0.611111	0.615385	1	0
chr1	764722	0.283019	0	0	0	0	0	0	0	0	0	0	0	0	0
chr1	765011	0.946429	0.25	0.285714	0	0	0	0	0	0	0	0	0	0.4	0
chr1	773579	0.980392	1	0.666667	0.625	0.666667	0	0	0	0	0	0	0	0	1
chr1	773713	0.980769	1	0.6	0.692308	0.555556	0.3	0	0	0	0	0	0	0	1
chr1	779466	1	1	0.857143	0.625	0.454545	0	0	0.333333	0	0	0	0	0.25	0
chr1	782833	1	1	0.8	0.625	0.666667	0	0	0	0	0	0	0.173913	0.333333	0
chr1	790590	0.934426	1	0.5	0.454545	0.785714	0.25	0	0	0	0	0	0	0	0
chr1	790907	0.930693	0	0	0.25	0.285714	0	0	0	0	0	0	0	0	0
chr1	790932	0.987013	0.7	0	0.285714	0.2	0.142857	0	0	0	0	0	0.139241	0	0
chr1	791054	0.8	0.571429	0	0	0	0	0	0	0	0	0	0.08	0	0
chr1	791071	0.913043	0.818182	0	0.307692	0	0.108108	0	0	0	0	0	0.147541	0	1
chr1	791098	0.911765	0.777778	0	0	0	0	0	0	0	0	0	0.14	0	0
chr1	793730	0.964286	0.333333	0.25	0	0.176471	0	0.1875	0	0	0	0	0	0	1
chr1	796249	0.914894	0	0	0.25	0.25	0	0	0	0	0	0	0	0	0
chr1	805102	0	0	0	0	0	0	0	0	0	0	0	0	0	0
chr1	808630	0.605634	0	0	0.214286	0	0	0	0	0	0	0	0	0	0
chr1	808642	0.945946	0	0.25	0.214286	0	0	0	0	0	0	0	0	0	1
chr1	808724	0.967213	0.666667	0	0.176471	0	0	0.15	0	0	0	0	0	0	0
chr1	808748	0.888889	0	0	0	0	0	0	0	0	0	0	0	0	0
chr1	810028	0.913793	0.777778	0	0	0.272727	0	0	0	0	0	0	0	0	0
chr1	810491	0.96875	0.8	0	0	0.136364	0.1875	0	0	0	0	0	0	0	0
chr1	812679	0.978261	0.4	0	0	0.176471	0	0	0	0	0	0	0	0	1
chr1	821192	0.769231	0.875	0	0.235294	0	0	0	0	0	0	0	0	0	0
chr1	824903	0.906977	0	0	0	0	0	0	0	0	0	0	0	0	1
chr1	825037	0.548387	0.333333	0.5	0.15	0	0	0	0	0	0	0	0	0	0
chr1	825196	0.584906	0.583333	0	0.210526	0.388889	0.5	0	0.285714	0	0	0	0.375	0.25	0
chr1	833786	0.904762	0.333333	0.375	0	0	0	0	0	0	0	0	0.166667	0	0
chr1	834863	0.971831	0	0	0	0	0	0	0	0	0	0	0	0	0
chr1	834882	0.969697	0	0	0	0	0.181818	0	0	0	0.1875	0	0	0	0
chr1	836805	0.882353	0.25	0.333333	0.333333	0	0	0	0	0	0	0	0	0	0
chr1	836967	0.878788	0	0	0	0	0	0	0	0	0	0	0	0	0
chr1	836997	0.854839	0	0	0	0	0	0	0	0	0	0	0	0	0
chr1	838785	0	0	0	0	0	0	0	0	0	0	0	0	0	0
chr1	840922	0	0	0	0	0	0	0	0	0	0	0	0	0	0
chr1	840944	0	0	0	0	0	0	0	0	0	0	0	0	0	0
chr1	841028	0	0	0	0	0	0	0	0	0	0	0	0	0	0
chr1	849057	0.961538	0.6	0	0	0	0.4	0	0	0	0	0	0	0.285714	1
chr1	850063	0.931034	1	0.333333	0.285714	0	0	0	0	0	0	0	0	0	0
chr1	850870	0.927273	0	0.333333	0	0	0	0	0	0	0	0	0	0	0
chr1	850885	0.965517	0.333333	0	0.214286	0.25	0	0	0	0	0	0	0	0	0
chr1	850891	1	0.833333	0.285714	0	0.461538	0	0	0	0	0	0	0	0	1
chr1	850975	0.982759	0.6	0	0.307692	0.25	0	0	0	0.136364	0	0	0	0	0
chr1	852099	1	0.625	0	0	0	0	0	0	0	0	0	0	0	0
chr1	853393	0.925	0.833333	0	0	0	0	0	0	0	0	0	0	0	0
chr1	854583	0.953125	0.571429	0	0.214286	0	0	0	0	0	0	0	0	0	0
chr1	856881	0.763636	0	0	0	0	0	0	0	0	0	0	0	0	0
chr1	856914	0.944882	0	0	0	0	0	0	0	0	0	0	0	0	1
chr1	856944	0.961538	0	0	0.333333	0	0.148148	0	0	0	0	0	0.189189	0	1
chr1	856956	0.955556	0	0	0.375	0	0	0	0	0	0	0	0	0	0
chr1	856975	0.984615	0	0	0.333333	0.25	0.125	0	0	0	0	0	0	0	1
chr1	856988	0.948148	0	0	0	0	0	0	0	0	0	0	0	0	0
chr1	861886	0.189655	0	0	0	0	0	0	0	0	0	0	0	0	0
chr1	861889	0.310345	0	0	0	0.15	0	0	0	0	0	0	0	0	0
chr1	861907	0.681818	0	0.285714	0	0	0	0	0	0	0	0.181818	0	0	0
chr1	865000	0.946809	0	0.333333	0	0	0.121212	0	0	0	0	0	0	0	0
chr1	866900	0.981132	0.5	0	0	0	0.185185	0	0	0	0	0	0	0	0
chr1	867020	0.95082	0	0	0	0	0	0	0	0	0	0	0	0	0
chr1	867031	0.964912	0.625	0	0.2	0	0.142857	0	0	0	0	0	0	0	0
chr1	867041	0.87037	0.571429	0	0.25	0	0.135135	0	0	0	0	0	0	0	0
chr1	867145	0.966667	0.454545	0	0	0	0	0	0	0	0	0	0	0	1
chr1	870619	0.97561	0	0	0	0	0	0	0	0	0	0	0	0	0
chr1	870628	0.933333	0	0	0	0	0	0	0	0	0	0	0	0	0
chr1	870637	1	0	0	0	0	0	0	0	0	0	0	0	0	1
chr1	870643	0.911111	0	0	0	0	0	0	0	0	0	0	0	0	0
chr1	870958	0.983607	0	0	0	0	0	0	0	0	0	0	0	0	0
chr1	873321	0.927273	0	0	0	0	0	0	0	0	0	0	0	0	1
chr1	874455	0.934783	0	0	0	0	0	0	0	0	0	0	0	0	1
chr1	881802	0.913043	0.8	0.4	0.4	0	0	0	0	0	0	0	0	0	0
chr1	881805	0.941176	0.4	0	0.636364	0.25	0	0	0	0	0	0	0	0	0
chr1	882004	0.985714	1	0.285714	0.6	0.4	0	0	0	0	0	0	0	0	1
chr1	884761	0.947368	1	0	0.5	0	0	0	0	0	0	0	0	0	0
chr1	884830	0.938776	1	0.4	0.272727	0	0	0	0	0	0	0	0	0	0
chr1	888487	0.944444	1	0.333333	0.416667	0.25	0	0	0	0	0	0	0	0	0
chr1	891591	1	1	0.428571	0.571429	0	0	0	0	0	0	0	0	0	1
chr1	891620	0.962963	1	0.333333	0.333333	0	0	0.272727	0	0	0	0.285714	0.176471	0	0
chr1	899809	0.766667	1	0.4	0.3	0	0	0	0	0	0	0	0	0	0
chr1	899827	0.928571	1	0.666667	0	0.285714	0	0	0	0	0	0	0	0	0
chr1	903938	0.94	0	0.4	0	0	0	0	0	0	0	0	0	0	0
chr1	903979	0.94	0	0	0	0	0	0	0	0	0	0	0.176471	0	0
chr1	903992	0.9375	0	0	0	0	0	0	0	0	0	0.272727	0	0	1
chr1	904021	1	0.444444	0.5	0	0	0.4	0	0	0	0	0.333333	0.272727	0	0
chr1	904032	0.957447	0	0	0	0	0	0	0	0	0	0.266667	0.416667	0	1
chr1	905909	0.459016	0.555556	0	0	0	0	0	0	0	0	0	0	0	1
chr1	905933	0.813559	0.9	0	0	0	0	0	0	0	0	0	0	0	0
chr1	905957	0.416667	0.8	0	0	0	0	0	0	0	0	0	0	0	0
chr1	908396	0.978723	1	0.4	0.6	0.5	0	0	0	0	0	0	0.3	0	0
chr1	908635	0.951613	1	0.857143	0.6	0	0	0	0	0	0.5	0	0	0.285714	0
chr1	908643	0.967213	1	0.571429	0.555556	0.333333	0	0	0	0	0	0	0.25	0	0
chr1	908670	1	1	0.833333	0.4	0	0	0	0	0	0	0	0	0	0
chr1	910397	0.970874	0.714286	0	0	0	0.097561	0.142857	0	0	0	0	0	0	0
chr1	910433	0.963855	1	0.4	0.555556	0.777778	0.36	0.153846	0.230769	0	0	0	0	0	0
chr1	910435	0.987952	1	0.4	0	0.555556	0.291667	0.171429	0	0	0.181818	0.130435	0	0	0
chr1	910452	0.952381	1	0	0.375	0.5	0.112903	0	0	0	0	0	0	0	0
chr1	915444	0.977528	0	0	0	0	0	0	0	0.166667	0	0	0	0	0
chr1	915449	0.91954	0	0	0	0	0	0	0	0	0	0	0.3	0	0
chr1	915489	0.9625	0	0	0	0	0.37037	0	0	0.214286	0	0	0.277778	0	1
chr1	915494	0.9125	0	0.272727	0	0	0.296296	0	0	0	0	0	0.3125	0	0
chr1	915740	0.959184	0	0	0	0	0	0	0	0	0	0.3	0	0	0
chr1	916017	0.966102	0	0	0	0	0.32	0.28	0	0	0.315789	0	0	0	1
chr1	917683	0.988095	0.3	0	0	0	0.25	0	0	0	0	0	0	0	0
chr1	917688	0.987013	0	0	0	0.2	0.25	0	0	0	0	0	0	0	0
chr1	917715	0.914286	0	0.25	0	0	0	0.263158	0	0	0.333333	0	0	0	0
chr1	917734	1	0	0	0	0	0.333333	0.266667	0	0	0	0	0	0	0
chr1	917741	0.936709	0	0	0	0	0	0.1875	0	0	0	0	0	0	0
chr1	917743	1	0	0	0	0	0	0.1875	0	0	0	0	0	0	0
chr1	918276	0.924242	0	0	0.4	0	0.193548	0	0	0	0	0	0	0	0
chr1	918294	0.985294	0	0.25	0.416667	0	0.291667	0	0	0	0	0	0	0	0
chr1	918299	0.971014	0	0	0.461538	0	0.227273	0	0	0	0	0	0.230769	0.333333	0
chr1	918304	0.955882	0	0.375	0.333333	0	0.227273	0	0	0	0	0	0	0	1
chr1	919338	0.955556	0.4	0	0	0	0	0	0	0	0	0	0	0	0
chr1	919341	0.955556	0	0	0	0	0	0	0	0	0	0	0	0	0
chr1	923259	0.965517	0.8	0	0.363636	0.285714	0.333333	0.444444	0	0.4	0	0	1	0.5	0
chr1	925892	0.962264	0.5	0.625	0	0.571429	0	0.285714	0.4	0	0.214286	0	0	0	1
chr1	925910	0.949153	0.285714	0.571429	0	0.428571	0.428571	0	0.333333	0	0	0	0	0	1
chr1	925915	0.982759	0.428571	0.571429	0.4	0.285714	1	0.5	0.4	0.444444	0.4375	0.555556	0	0.6	0
chr1	927296	0.970588	1	0.5	0	0	0.857143	0.625	0.4	0.571429	0	0	0.777778	0.333333	0
chr1	931153	0.953488	0	0	0	0	0	0	0	0	0	0	0	0	0
chr1	933491	0	1	0	0	0	0	0	0	0	0	0	0	0	0
chr1	933494	0	0	0	0	0	0	0	0	0	0	0	0	0	0
chr1	933504	0	0.8	0	0	0	0	0	0	0	0	0	0	0	0
chr1	933508	0	0	0	0	0	0	0	0	0	0	0	0	0	0
chr1	933556	0	0	0	0	0	0	0	0	0	0	0	0	0	0
chr1	933595	0	0	0	0	0	0	0	0	0	0	0	0	0	1
chr1	933600	0	0	0	0	0	0	0	0	0	0	0	0	0	0
chr1	937443	0	0	0	0	0	0	0	0	0	0	0	0	0	0
chr1	938311	0.9	0	0	0	0	0	0	0	0	0	0	0	0	0
chr1	938349	0.966667	0.5	0	0.272727	0	0.285714	0	0	0	0	0	0	0	0
chr1	938352	0.9	0.25	0	0.3	0	0.333333	0	0	0	0	0	0	0	0
chr1	941996	0.963636	0	0	0	0	0.157895	0.15	0	0	0	0	0	0	0
chr1	942015	0.888889	0	0	0	0	0	0.15	0	0	0	0	0	0	0
chr1	942079	0.97619	0	0	0	0	0	0	0	0	0	0	0	0	0
chr1	942087	0.955556	0	0	0	0	0.28	0	0	0	0.192308	0	0	0	0
chr1	944194	0.95	0	0.4	0	0	0.785714	0.4	0.5	0.25	0.444444	0.6	0.714286	0	0
chr1	944685	0.909091	0	0	0.333333	0	0.444444	0	0	0	0	0	0	0	0
chr1	952641	0.868421	1	0.571429	0.666667	0.285714	0.3	0	0	0	0	0	0	0	0
chr1	959136	0.857143	1	0	0.5	0.230769	0.137931	0	0	0	0	0	0	0	0
chr1	959154	0.482759	0.6	0	0	0	0	0	0	0	0	0	0	0	0
chr1	959160	0.967742	1	0.4	0.4	0.5	0.294118	0	0	0	0	0	0.25	0	0
chr1	959167	0.95	1	0	0.4	0.363636	0.315789	0	0	0	0	0	0.307692	0	0
chr1	959553	0.981818	1	0	0.416667	0	0	0	0	0	0	0	0	0	0
chr1	962110	0.914894	1	0	0.3	0	0	0	0	0	0	0	0	0	0
chr1	962142	1	0.818182	0.25	0	0.333333	0	0.130435	0	0	0	0	0	0	0
chr1	962219	0.96	1	0.428571	0	0	0	0	0	0	0	0	0	0	0
chr1	962223	0.943396	1	0.375	0	0.666667	0	0	0	0	0	0	0	0	0
chr1	967836	0	1	0	0.333333	0	0.185185	0	0	0	0	0	0	0	0
chr1	967886	0	1	0	0	0	0	0	0	0	0	0	0	0	0
chr1	968192	0	1	0	0	0	0	0	0	0	0	0	0	0	0
chr1	968230	0	0.6	0	0	0	0	0	0	0	0	0	0	0	0
chr1	969922	0	1	0.444444	0.25	0.333333	0	0	0	0	0	0	0	0.25	0
chr1	970664	0.787234	1	0	0.571429	0	0	0	0	0	0	0	0	0	0
chr1	970690	0.824561	1	0.333333	0.571429	0.363636	0	0.2	0	0	0	0	0	0	0
chr1	970693	0.758621	1	0	0.428571	0	0	0.2	0	0	0	0	0	0	0
chr1	970722	0.848485	1	0.285714	0.333333	0.5	0	0	0	0	0	0	0	0	1
chr1	971472	0.962264	1	0.8	0	0	0	0	0	0	0	0	0.222222	0	0
chr1	972325	1	0.875	0.4	0	0	0	0.130435	0	0	0	0	0	0	0
chr1	974366	0.894737	1	0	0	0	0.173913	0	0	0	0.176471	0	0	0	0
chr1	974378	0.901961	1	0.25	0	0	0.173913	0	0	0	0	0	0	0	0
chr1	974468	0.910714	0.333333	0.375	0.333333	0.214286	0	0	0	0	0	0	0	0	0
chr1	977454	0.580247	1	0.666667	0.5	0.461538	0	0.181818	0	0	0	0	0	0	0
chr1	977458	0.845238	1	0.6	0.625	0	0.153846	0.136364	0	0	0	0	0	0	0
chr1	977462	0.654762	1	0.5	0.625	0.384615	0	0.166667	0	0	0	0	0	0	0
chr1	977482	0.850575	1	0.25	0.625	0.538462	0.130435	0.181818	0	0	0	0	0	0	0
chr1	977500	0.891566	1	0.571429	0.4	0.533333	0.130435	0.142857	0	0	0	0	0	0	0
chr1	979799	0.951613	1	0.444444	0.363636	0.375	0.296296	0	0	0	0	0.15	0	0	0
chr1	979816	0.885246	1	0	0.363636	0.3	0.25	0	0	0	0	0	0.142857	0	0
chr1	979826	0.969697	1	0.555556	0.454545	0.272727	0.157895	0	0	0.136364	0	0	0.222222	0	0
chr1	979834	0.930556	1	0	0	0.4	0	0	0	0	0	0	0.210526	0	0
chr1	979854	0.972973	1	0.3	0.3	0.333333	0	0	0	0	0	0	0.266667	0	1
chr1	979890	0.975309	1	0.5	0.5	0	0	0	0	0	0	0	0.206897	0	0
chr1	979896	0.964286	1	0.375	0	0	0	0	0	0	0	0	0.178571	0	0
chr1	979905	0.892857	1	0.5	0.3	0.5	0	0	0	0	0	0	0.2	0	0
chr1	979922	0.902439	1	0	0	0	0	0	0	0	0	0	0	0	1
chr1	979949	0.895349	1	0.4	0.25	0.214286	0.153846	0	0	0	0	0	0.151515	0	0
chr1	980190	0.9625	1	0.428571	0.285714	0	0	0.135135	0	0	0	0	0	0.15	0
chr1	980201	0.975309	1	0.25	0.444444	0.285714	0	0.0930233	0	0	0	0	0	0.166667	0
chr1	980226	0.973684	1	0.25	0.75	0	0	0	0	0	0	0	0	0.157895	0
chr1	980236	0.974359	1	0.333333	0.571429	0.307692	0	0.113208	0	0	0	0	0	0.190476	0
chr1	980257	0.926829	1	0.333333	0.5	0.384615	0	0	0	0	0	0	0	0	0
chr1	980274	0.987179	1	0	0	0.466667	0	0.181818	0	0	0	0	0	0.190476	0
chr1	980276	0.963855	0.888889	0.555556	0.375	0.6	0	0.2	0	0	0	0	0	0.190476	0
chr1	980298	0.96	1	0.375	0.333333	0.3125	0	0.285714	0	0	0	0	0	0	0
chr1	980304	0.961039	1	0.333333	0	0.25	0	0.259259	0	0	0	0	0	0	0
chr1	980439	0.969231	1	0.571429	0	0.25	0.222222	0	0	0	0	0	0	0	0
chr1	981334	0.983333	1	0.5	0.285714	0.75	0	0.178571	0	0	0	0	0	0	1
chr1	981345	0.982759	1	0.444444	0.357143	0.375	0	0.133333	0	0	0	0	0	0	0
chr1	981353	1	1	0.714286	0.285714	0.714286	0	0.142857	0	0	0.16	0	0	0	1
chr1	981359	0.898305	1	0.571429	0.285714	0.571429	0	0.178571	0	0	0	0	0	0	0
chr1	981368	0.966102	1	0.571429	0.333333	0.625	0.230769	0.138889	0	0	0.225806	0	0.125	0	0
chr1	981376	1	1	0.571429	0.416667	0.714286	0.423077	0.176471	0	0	0.192308	0	0.1875	0	0
chr1	981387	0.982759	1	0.666667	0.416667	0.75	0.444444	0.277778	0	0	0	0	0.16	0	0
chr1	981392	0.948276	1	0.5	0.384615	0.666667	0.47619	0.133333	0	0	0	0	0.142857	0	0
chr1	981394	0.965517	0.875	0.666667	0.307692	0.555556	0.5	0.258065	0	0	0.206897	0	0.142857	0	0
chr1	981399	0.984127	1	0.5	0	0.4	0.285714	0.137931	0	0	0	0	0.142857	0	1
chr1	984639	1	1	0.6	0.4	0.5	0.461538	0.210526	0	0.142857	0	0	0	0	0
chr1	984707	0.973684	1	0.8	0.666667	0.375	0.529412	0	0	0	0	0	0	0	0
chr1	984710	1	1	0.8	0.666667	0.75	0.666667	0.192308	0.333333	0	0	0	0	0	0
chr1	985508	0.972222	0.909091	0.25	0.5	0	0	0	0	0	0	0	0	0	0
chr1	985548	0.97619	1	0	0	0.333333	0	0	0	0	0	0	0	0	0
chr1	985574	1	1	0.625	0	0.375	0	0	0	0	0	0	0	0	0
chr1	985656	0.93617	1	0	0	0	0	0	0	0	0.3	0	0	0	1
chr1	987057	0.897959	1	0.375	0.6	0.545455	0.142857	0	0	0	0	0	0.363636	0	1
chr1	987067	0.977273	0.833333	0	0.5	0.333333	0	0	0	0	0	0	0.272727	0	0
chr1	987076	0.909091	0	0.333333	0.5	0.333333	0	0	0	0	0	0	0.272727	0	0
chr1	987126	0.916667	1	0.25	0.727273	0.230769	0.222222	0.1875	0	0	0	0	0.25	0	0
chr1	987133	0.938776	1	0.5	0.454545	0	0	0	0	0	0	0	0.25	0	0
chr1	987703	0.972477	0.8	0.75	0	0.666667	0.310345	0.133333	0	0	0	0	0.178571	0	0
chr1	987815	0.984375	1	0	0	0.25	0.122449	0	0	0	0	0	0	0	0
chr1	987829	0.95935	1	0	0.375	0.625	0.207547	0	0	0	0	0.1875	0	0	0
chr1	987949	0.649573	0.571429	0.333333	0.625	0	0.166667	0	0	0	0	0	0.173913	0	0
chr1	987973	0.925	0.7	0.25	0.571429	0.666667	0.578947	0.375	0.428571	0.444444	0.44	0.5	0.740741	0.566667	0
chr1	988198	0.760331	0.4	0.6	0	0.352941	0.2	0	0	0.0980392	0	0	0.1	0	0
chr1	988291	0.751938	1	0	0.333333	0.388889	0.14	0	0	0	0	0	0	0	0
chr1	988723	0.964912	1	0.8	0.3	0.454545	0	0	0	0	0	0	0	0	0
chr1	991523	0.867925	1	0.4	0.5	0.428571	0.444444	0	0	0	0	0	0	0	0
chr1	991525	0.87037	1	0.4	0.666667	0.428571	0.444444	0	0	0	0.25	0	0	0	0
chr1	991533	0.792453	1	0.4	0.428571	0.333333	0	0	0	0	0	0	0	0	0
chr1	991549	0.960784	1	0.333333	0.5	0.5	0.555556	0	0	0	0	0	0	0	0
chr1	993726	0	0	0	0	0	0	0	0	0	0	0	0	0	0
chr1	993742	0	0	0	0	0	0	0	0	0	0	0	0	0	0
chr1	993810	0	0	0	0	0	0	0	0	0	0	0	0	0	1
chr1	993858	0	0	0	0	0	0	0	0	0	0	0	0	0	0
chr1	993864	0	0	0	0	0	0	0	0	0	0	0	0	0	0
chr1	993886	0	0	0	0	0	0	0	0	0	0	0	0	0	0
chr1	994055	0	0	0	0	0	0	0	0	0	0	0	0	0	0
chr1	994122	0	0	0	0	0	0	0	0	0	0	0	0	0	0
chr1	994127	0	0	0	0	0	0	0	0	0	0	0	0	0	0
chr1	994146	0	0.214286	0	0	0	0	0	0	0	0	0	0	0	0
chr1	994156	0	0	0	0	0	0	0	0	0	0	0	0	0	0
chr1	994179	0	0	0	0	0	0	0	0	0	0	0	0	0	0
chr1	994197	0	0	0	0	0	0	0	0	0	0	0	0	0	0
chr1	994207	0	0	0	0	0	0	0	0	0	0	0	0	0	0
chr1	995500	0	0	0	0	0	0	0	0	0	0	0	0	0	0
chr1	995535	0	0	0	0	0	0.25	0	0	0	0	0	0	0	0
chr1	995537	0	0	0	0	0	0.25	0	0	0	0	0	0	0	0
chr1	995717	0	0.666667	0	0	0	0	0	0	0	0	0	0	0	0
chr1	995745	0	0.428571	0	0	0	0	0	0	0	0	0	0	0	0
chr1	995747	0	0.428571	0	0	0	0	0	0	0	0	0	0	0	0
chr1	995798	0	0.5	0	0	0	0	0	0	0	0	0	0	0	0
chr1	995932	0	0	0	0	0	0	0	0	0	0	0	0	0	0
chr1	995952	0.1	0	0	0	0	0	0	0	0	0	0	0.139535	0	0
chr1	995967	0	0	0	0	0	0	0	0	0	0	0	0	0	0
chr1	995996	0.203704	0	0	0	0	0	0	0	0	0	0	0.142857	0	0
chr1	996054	0	0	0	0	0	0	0	0	0	0	0	0	0	1
chr1	998638	0.982759	0	0	0	0	0	0	0	0	0.214286	0	0	0	0
chr1	998659	1	0	0.285714	0.25	0	0.176471	0	0	0	0.25	0	0.142857	0	0
chr1	998672	0.924242	0.714286	0	0	0	0.176471	0.210526	0	0	0.363636	0	0	0	0
chr1	998680	0.971014	0	0.25	0	0	0.210526	0.157895	0	0	0.357143	0	0	0	0
chr1	998710	0.972222	0.6	0	0	0	0	0	0	0	0	0	0	0	0
chr1	1001317	0.972222	0	0	0	0	0	0	0	0	0	0	0	0	0
chr1	1001343	0.969697	0	0.4	0	0	0	0	0	0	0	0	0	0.285714	0
chr1	1002434	0	0	0	0	0	0	0.185185	0	0	0	0	0	0	0
chr1	1007698	0.965517	1	0	0.444444	0	0	0	0	0	0	0	0	0	1
chr1	1007705	0.949153	0.666667	0.4	0.444444	0	0	0	0	0	0	0	0	0	0
chr1	1007730	0.955882	1	0.428571	0.3	0	0	0	0	0	0	0	0	0	1
chr1	1007917	0.961538	1	0.4	0.444444	0.3	0	0	0	0	0	0	0	0	0
chr1	1010769	0.980392	0	0	0	0	0	0	0	0	0	0	0	0	0
chr1	1014506	0.909774	0.333333	0.545455	0.375	0	0.625	0.428571	0.285714	0.176471	0.6	0.714286	0.666667	0	0
chr1	1014511	0.977099	0.25	0.5	0.173913	0.3	0.5625	0.384615	0	0.166667	0.333333	0.428571	0.428571	0	0
chr1	1014536	0.9375	0.25	0.416667	0.592593	0.363636	0.8	0.5	0.285714	0	0.727273	0.625	0.363636	0	0
chr1	1014866	0.86	0	0	0	0.25	0	0	0	0	0	0	0	0	1
chr1	1014873	0.869565	0	0	0	0	0	0	0	0	0	0	0	0	0
chr1	1014932	0.925926	0	0	0	0	0	0	0	0	0	0	0	0	1
chr1	1017480	0.962963	0	0	0	0	0	0	0	0	0	0	0	0	0
chr1	1018775	1	1	0	0	0	0.136364	0.148148	0	0	0	0	0.142857	0.285714	0
chr1	1018789	0.977778	0	0	0	0.363636	0.2	0.142857	0	0	0	0	0.131579	0	0
chr1	1018808	0.956522	0.4	0	0	0	0.136364	0	0	0	0	0	0.15625	0	1
chr1	1018941	0.948276	1	0	0.444444	0.230769	0.3125	0	0	0	0	0	0	0	0
chr1	1018950	0.968254	1	0	0	0.266667	0.285714	0	0	0	0	0	0	0	0
chr1	1018958	0.861538	0.4	0	0.333333	0	0	0	0	0	0	0	0	0	0
chr1	1018965	0.951613	1	0	0	0	0.214286	0	0	0	0	0	0	0	0
chr1	1020699	0.95	0.6	0.333333	0.333333	0.25	0	0	0	0	0	0	0	0	0
chr1	1021880	0.92	0.8	0.333333	0.333333	0	0	0	0	0	0	0	0	0	0
chr1	1022894	0.901639	0.8	0	0.8	0.5	0	0	0	0	0	0	0	0	0
chr1	1022995	0.983333	1	0	0.307692	0	0	0	0	0	0.3	0	0	0	0
chr1	1026027	0.977778	1	0.5	0.428571	0	0	0.142857	0	0	0	0	0	0	1
chr1	1026125	0.906977	1	0.5	0.571429	0.444444	0.333333	0.266667	0	0	0.2	0	0	0	1
chr1	1026199	0.913043	1	0.428571	0.5	0.363636	0	0	0	0	0	0.25	0	0	0
chr1	1026207	0.938776	1	0.285714	0.714286	0.5	0	0.15	0	0	0	0.4	0	0	0
chr1	1026255	0.928571	1	0.75	0.5	0.5	0.294118	0.181818	0	0.130435	0	0	0	0.285714	0
chr1	1026387	0.803571	1	0.4	0.5	0.363636	0	0	0	0	0	0	0	0	0
chr1	1029216	0.935484	1	0.625	0.25	0.333333	0	0	0	0	0	0	0	0	0
chr1	1034953	0.666667	0	0.333333	0.333333	0.333333	0.210526	0	0	0	0	0	0.15	0	0
chr1	1035162	0.823529	1	0.666667	0.857143	0.538462	0.25	0.352941	0	0	0.272727	0	0.545455	0	1
chr1	1040580	1	0.8	0.666667	0.272727	0.666667	0.4	0.333333	0.4	0	0.6	0	0.75	0	0
chr1	1040679	1	1	0.888889	0.583333	0.727273	0.5	0.888889	0.875	0.4	0.833333	0.285714	1	0.333333	0
chr1	1040704	1	1	0.818182	0.583333	0.666667	0.375	0.583333	0.714286	0	0.8	0	1	0	0
chr1	1042181	0.909091	1	1	1	0.875	0.8125	0.666667	0.5	0	0.615385	0.625	0.6	0.444444	0
chr1	1042188	0.928571	1	1	1	0.875	0.8125	0.666667	1	0.428571	1	0.875	0.923077	0.545455	0
chr1	1042203	0.820513	1	0.6	1	0.75	0.722222	0.5	0.428571	0.555556	0.636364	0.777778	0.533333	0.833333	0
chr1	1042228	0.842105	1	1	1	0.8	0.8125	0.9	0.8	0.5	0.7	0.666667	0.833333	0.888889	0
chr1	1045270	0.977778	1	0.428571	0.555556	0	0.25	0.25	0	0	0	0	0.285714	0	0
chr1	1047458	0.826923	0.875	0.6	0.25	0	0.625	0.214286	0.545455	0.166667	0.1875	0	0.733333	0.285714	0
chr1	1047475	0.877193	0.6	0.8	0.166667	0	0.722222	0.555556	0.5	0.208333	0.642857	0	0.9	0.666667	0
chr1	1047671	0.815385	1	0	0	0.4	0.6875	0.733333	0.6	0	0.75	0	0.466667	0	0
chr1	1047674	0.84127	1	0	0.285714	0.4	0.375	0.461538	0	0	0.545455	0	0.4	0	0
chr1	1047682	0.796875	1	0	0.285714	0.4	0.733333	0.733333	0.8	0	0.75	0	0.647059	0	0
chr1	1049127	0.714286	1	0.333333	0.333333	0.428571	0.909091	1	1	0.857143	0.818182	0.6	1	1	0
chr1	1050131	0	1	0	0.363636	0	0	0.136364	0	0	0	0	0	0	0
chr1	1054743	0.837209	0	0	0	0	0	0	0	0	0	0	0	0	0
chr1	1058221	0.923077	0	0	0	0	0	0	0	0	0	0	0	0	0
chr1	1058247	1	0	0	0	0	0	0	0	0	0	0	0	0	0
chr1	1058255	0.893939	0	0	0	0	0	0	0	0	0	0	0	0	0
chr1	1058270	0.970588	0	0	0.25	0	0	0	0	0	0	0	0	0	0
chr1	1058289	1	0	0	0.230769	0	0	0	0	0	0	0	0	0.25	1
chr1	1058335	0.764706	0	0	0	0	0	0	0	0	0	0	0	0	0
chr1	1060600	0.960784	0	0.285714	0	0	0	0	0	0	0	0	0	0	0
chr1	1060947	0.953488	0	0	0	0.25	0	0	0	0	0	0	0	0	0
chr1	1064812	0.932432	0	0.25	0	0	0	0	0	0	0	0	0	0	1
chr1	1064845	0.942029	0	0	0	0	0	0	0	0	0	0	0	0	1
chr1	1064889	0.953846	0	0	0	0	0	0	0	0	0	0	0	0	0
chr1	1065251	0.945946	0.285714	0	0	0	0	0	0	0	0.285714	0	0	0	1
chr1	1068450	0.978723	0	0	0.285714	0	0	0	0	0	0	0	0	0	0
chr1	1068458	0.957447	0	0	0.285714	0	0	0	0	0	0	0	0	0	0
chr1	1068460	0.957447	0.25	0.285714	0.285714	0	0.166667	0	0	0	0	0	0	0	0
chr1	1068467	1	0	0	0.571429	0	0	0	0	0	0	0	0	0.333333	0
chr1	1072259	0	0	0	0	0	0	0	0	0	0	0	0	0	0
chr1	1076166	0.964912	0	0	0.363636	0	0.333333	0	0	0	0	0	0.307692	0	1
chr1	1076191	0.962264	0.4	0	0.3	0	0	0	0	0	0	0	0	0	0
chr1	1076237	0.945455	0	0	0.25	0	0	0	0	0	0	0	0	0	0
chr1	1076245	0.901961	0	0	0	0	0	0	0	0	0	0	0	0	0
chr1	1081796	1	0	0	0	0.2	0	0	0	0	0	0	0	0	1
chr1	1081802	0.965517	0	0	0	0	0	0	0	0	0	0	0.15	0	0
chr1	1081832	1	0	0	0	0	0	0	0	0	0	0	0	0	0
chr1	1081889	1	0	0	0	0	0	0	0	0	0	0	0	0	0
chr1	1081900	0.942857	0	0	0	0	0	0	0	0	0.15	0	0	0	0
chr1	1082526	0.981481	0	0	0	0	0.588235	0.37037	0	0.181818	0.294118	0	0	0.238095	0
chr1	1083756	0.981818	0	0	0	0	0.217391	0	0	0	0.222222	0	0	0	0
chr1	1085103	0.947368	0	0	0	0	0.130435	0.136364	0	0	0	0	0	0	0
chr1	1087711	0.915254	0.4	0.571429	0.5	0.333333	0.625	0.625	0	0.4	0	0.4	0	0.272727	0
chr1	1094489	0.972973	0	0.363636	0	0	0.333333	0	0	0	0	0	0	0	0
chr1	1096769	0.961538	0.333333	0	0	0	0	0	0	0	0	0	0	0.4	0
chr1	1097746	0.95	0	0.333333	0	0	0	0	0	0	0	0	0	0	1
chr1	1099365	0.888889	0.4	0	0	0	0	0.16	0	0	0	0	0	0	0
chr1	1099449	0.71875	0	0	0	0	0.15	0	0	0	0	0	0	0	0
chr1	1099462	0.823529	0.4	0	0	0	0	0	0	0	0	0	0	0	0
chr1	1099810	0.902439	0	0	0	0	0	0	0	0	0	0	0.2	0	0
chr1	1099815	0.780488	0	0	0	0	0	0	0	0	0	0	0.1875	0	0
chr1	1099863	0.95122	0	0	0	0	0	0	0	0	0	0	0.266667	0	1
chr1	1099872	0.880952	0	0	0	0	0	0	0	0	0	0	0	0	0
chr1	1099874	0.837209	0	0	0	0	0	0	0	0	0	0	0	0	0
chr1	1099958	0.866667	0.333333	0	0	0	0	0	0	0	0	0	0	0	1
chr1	1101212	0.942308	0	0	0	0	0	0.166667	0	0	0	0	0.2	0	0
chr1	1105097	0.921569	0	0	0	0	0	0	0	0	0	0	0	0	0
chr1	1105104	0.96	0	0	0	0	0	0	0	0	0	0	0	0	0
chr1	1105300	0.981132	0	0	0	0	0	0	0	0	0	0	0	0	1
chr1	1107146	0.87234	0	0	0	0	0	0	0	0	0	0	0	0	0
chr1	1107918	0.965517	0	0	0	0	0	0	0	0	0	0.285714	0.176471	0	0
chr1	1107959	0.903846	0	0	0	0	0	0	0	0	0	0.4	0	0	0
chr1	1109042	0.94	0	0	0	0	0	0	0	0	0	0	0	0	0
chr1	1111248	0.970149	0	0.4	0	0	0.1875	0.2	0	0	0	0	0.142857	0.1875	0
chr1	1111270	1	0	0	0	0	0.515152	0.384615	0.5	0.230769	0.48	0.24	0.473684	0	0
chr1	1111278	0.968254	0	0	0	0	0.411765	0.24	0.285714	0	0.26087	0	0.294118	0	0
chr1	1111303	0.927536	0	0	0	0	0.342105	0	0.285714	0	0	0	0.307692	0	0
chr1	1111328	0.921875	0	0	0	0	0.318182	0	0	0	0	0.133333	0.25	0	0
chr1	1111650	0.935065	0	0	0	0	0.25	0	0	0	0	0	0	0	0
chr1	1111758	0.931507	0	0	0	0	0	0	0	0	0.230769	0	0	0	1
chr1	1118503	0.897959	0	0	0	0	0	0	0	0	0	0	0	0	0
chr1	1118506	0.862745	0	0	0	0	0	0	0	0	0	0	0	0	1
chr1	1118521	0.94	0	0	0	0	0	0	0	0	0.15	0	0	0	0
chr1	1119937	0.96875	0.25	0	0	0	0.411765	0	0	0	0	0	0	0	0
chr1	1128532	1	0.666667	0.470588	0.4	0.6	0.428571	0.727273	0.6	0.4	0.6	0.375	0.3	0.333333	0
chr1	1129091	0.981132	1	0.5	0.615385	0.333333	0.75	1	0.6	0.5	0.857143	0.666667	0.545455	0.333333	0
chr1	1129136	0.938776	0	0.4	0.4	0.333333	0.375	0.615385	0.4	0.25	0.416667	0.714286	0.833333	0.333333	0
chr1	1135320	0.910714	0	0	0	0	0	0	0	0	0	0.25	0	0	0
chr1	1135332	0.947368	0	0.25	0	0	0.333333	0	0	0	0	0.333333	0	0	0
chr1	1135335	0.927273	0	0	0	0.3	0.333333	0	0	0	0	0.285714	0	0	0
chr1	1135344	0.910714	0	0.25	0	0	0.285714	0	0	0	0	0.25	0	0	0
chr1	1141753	0.979592	0	0.5	0	0	0	0	0	0	0	0	0	0	0
chr1	1141766	0.959184	0	0.571429	0	0.25	0	0	0	0	0	0	0	0	1
chr1	1141774	0.962963	0	0.285714	0	0.428571	0	0	0	0	0	0	0	0	0
chr1	1141776	0.962264	0	0.4	0	0.428571	0	0	0	0	0	0	0	0	0
chr1	1141785	1	0	0.4	0	0.428571	0	0	0	0	0	0	0	0	0
chr1	1141787	1	0	0.666667	0	0.428571	0	0	0	0	0	0	0	0	0
chr1	1141790	0.979167	0	0.5	0	0.285714	0	0	0	0	0	0	0	0	0
chr1	1141809	0.954545	0	0.666667	0	0	0	0	0	0	0	0	0	0	0
chr1	1141813	0.909091	0.5	0.666667	0	0	0	0	0	0	0	0	0	0	0
chr1	1141817	0.977273	0	0.666667	0	0	0	0	0	0	0	0	0	0	0
chr1	1141823	0.977273	0	0.5	0	0	0	0	0	0	0	0	0	0	0
chr1	1142291	0.962963	0	0	0	0	0	0	0	0	0	0	0	0	0
chr1	1142312	0.909091	0	0.428571	0	0	0	0	0	0	0	0	0	0	1
chr1	1143437	0.933333	0	0.5	0.363636	0	0.625	0.428571	0.4	0.5	0	0.625	0	0.285714	0
chr1	1143480	0.951613	0.375	0	0	0	0.272727	0.235294	0	0	0	0	0	0	0
chr1	1148354	0.947368	0	0.625	0	0.375	0	0	0	0	0	0	0	0	0
chr1	1148363	0.9	0	0.625	0	0	0	0	0	0	0	0	0	0	0
chr1	1148973	0.970149	0	0	0.5	0	0	0	0	0	0	0	0	0	0
chr1	1148998	0.971014	0	0	0	0	0	0	0	0	0	0	0	0	0
chr1	1149088	0.934211	0	0	0	0	0	0	0	0	0	0	0	0	1
chr1	1149091	0.922078	0	0	0	0	0	0.130435	0	0	0	0	0	0	0
chr1	1149104	0.974359	0	0	0	0	0	0.157895	0	0	0	0	0	0	1
chr1	1149109	0.936709	0	0.272727	0.272727	0	0	0	0	0	0	0	0	0	0
chr1	1149113	0.973333	0	0	0.272727	0	0	0	0	0	0	0	0	0	1
chr1	1149117	0.972222	0	0.272727	0.272727	0	0	0	0	0	0	0	0	0	0
chr1	1149125	0.971429	0	0.272727	0	0	0	0	0	0	0	0	0	0	0
chr1	1149138	1	0	0	0.3	0	0	0	0	0	0	0	0	0	0
chr1	1149147	0.984127	0	0	0	0	0	0	0	0	0	0	0	0	0
chr1	1150936	0.95122	0.4	0	0.285714	0	0	0	0	0	0	0	0	0	0
chr1	1151153	0.928571	1	0	0	0.5	0	0	0	0	0	0	0	0	0
chr1	1151249	1	1	0.833333	0.214286	0	0	0	0	0	0	0	0	0.333333	0
chr1	1156536	1	1	0	0	0.4	0.1875	0	0	0	0	0	0	0	0
chr1	1161473	0.932203	1	0.615385	0.3	0.157895	0	0	0	0	0	0	0	0	0
chr1	1161510	0.969697	1	0.6	0.375	0.4	0	0	0	0	0	0	0	0	0
chr1	1161535	0.955224	1	0.888889	0.3	0.277778	0	0	0	0	0	0	0	0	0
chr1	1161570	0.903226	1	0.857143	0.375	0.3	0	0	0	0	0	0	0	0	0
chr1	1161589	0.965517	1	0.571429	0.555556	0.545455	0	0	0	0	0	0	0	0	0
chr1	1163064	0.685185	0.363636	0.333333	0.5	0.333333	0	0	0	0	0	0	0	0	0
chr1	1163076	0.941176	1	0.666667	0.5	0.714286	0.4	0	0	0	0	0	0	0	1
chr1	1163080	0.979167	1	0.714286	0.625	0.666667	0	0	0	0	0	0	0	0	0
chr1	1163085	0.963636	1	0.5	0.777778	0.8	0.4	0.363636	0	0	0.230769	0	0	0	0
chr1	1163099	0.982456	1	0.444444	0.375	0.4	0	0.230769	0	0	0	0	0	0	0
chr1	1163103	0.931034	1	0.666667	0.333333	0.4	0	0	0	0	0	0	0	0	0
chr1	1163173	0.966102	1	0.333333	0	0.8	0.192308	0	0	0	0	0	0	0.5	0
chr1	1163708	0.959184	1	0.5	0.6	0.857143	0	0	0	0	0	0	0	0.285714	0
chr1	1163718	0.959184	1	0.5	0.727273	0.875	0	0	0	0	0	0	0	0.285714	0
chr1	1166938	0	0	0	0	0	0	0	0	0	0	0	0	0	0
chr1	1168884	0	0	0	0	0	0	0	0	0	0	0	0	0.333333	0
chr1	1168894	0	0	0	0	0	0	0	0	0	0	0	0	0.4	0
chr1	1168955	0	0	0	0	0	0	0	0	0	0	0	0	0	0
chr1	1168970	0	0	0	0	0	0	0	0	0	0	0	0	0	0
chr1	1168984	0	0	0	0	0	0	0	0	0	0.272727	0	0	0	0
chr1	1169038	0	0	0	0	0	0	0	0	0	0.307692	0	0	0	0
chr1	1169067	0	0	0	0	0	0.25	0	0	0	0.25	0	0	0	0
chr1	1170077	0.857143	0.666667	0	0	0.25	0.181818	0	0	0	0	0	0	0.25	0
chr1	1170100	0.703704	0.4	0	0	0.272727	0	0	0	0	0	0	0	0.25	0
chr1	1170153	0.861111	0.25	0.363636	0	0	0	0	0	0	0	0	0	0	0
chr1	1170818	0.864865	1	0.375	0	0	0.285714	0	0	0	0	0	0	0	1
chr1	1170856	1	1	0	0	0	0.25	0.157895	0	0	0	0	0	0	0
chr1	1170862	1	0.6	0.5	0	0.4	0.333333	0.2	0	0	0	0	0	0	1
chr1	1178954	0.958333	0.9	0.285714	0.428571	0	0	0	0	0	0	0	0	0	0
chr1	1185233	1	1	0.5	0.727273	0.625	0.35	0.166667	0	0.16	0	0	0	0	0
chr1	1185317	0.911111	1	0.6	0.466667	0.428571	0	0	0	0	0	0	0	0	0
chr1	1185330	0.890909	1	0.428571	0.5	0.666667	0	0	0	0	0	0	0	0	0
chr1	1189612	0.959184	1	0.666667	0.777778	0.333333	0	0	0	0	0	0	0	0	0
chr1	1189617	0.98	1	0.666667	0.666667	0.333333	0	0	0	0	0	0	0	0	1
chr1	1189640	0.981818	1	0.6	0.5	0.555556	0	0	0	0	0	0	0	0	0
chr1	1189649	0.944444	1	0.6	0.571429	0.583333	0.2	0	0	0	0	0	0	0.333333	0
chr1	1190609	0.894737	1	0.5	0.6	0.8	0	0	0	0	0	0	0	0	0
chr1	1190619	0.913793	1	0.833333	0.555556	0.8	0	0	0	0	0	0	0	0	0
chr1	1190661	0.92	1	0	0.4	0.5	0	0	0	0	0	0	0	0	0
chr1	1190669	1	1	0	0.4	0.5	0	0	0	0	0	0	0	0	0
chr1	1190684	0.92	0.8	0.25	0.285714	0.444444	0	0	0	0	0	0.4	0	0	0
chr1	1190692	0.923077	1	0.375	0.428571	0.333333	0	0	0	0	0	0	0	0	1
chr1	1190714	0.918033	0.8	0.666667	0.428571	0.272727	0	0	0	0	0	0	0	0	0
chr1	1190726	0.983871	1	0.25	0.428571	0.333333	0	0	0	0	0	0	0	0	1
chr1	1190733	0.95082	1	0.666667	0.333333	0.333333	0	0	0	0	0	0	0	0	0
chr1	1190736	0.983607	1	0.555556	0	0.3	0	0	0	0	0	0	0	0	0
chr1	1190744	0.954545	1	0.5	0	0	0	0	0	0	0	0	0	0	0
chr1	1190762	0.942029	1	0.375	0	0	0	0	0	0	0	0	0	0	0
chr1	1191880	1	1	0.5	0	0	0	0	0	0	0	0	0.5	0	0
chr1	1194603	0.984375	1	0.6	0.625	0.571429	0	0	0	0	0	0	0	0	0
chr1	1194638	0.968085	1	0.4	0.666667	0.375	0	0	0	0	0	0	0	0	0
chr1	1194673	0.951872	1	0.666667	0.636364	0.777778	0.153846	0	0	0	0	0	0	0	0
chr1	1194675	0.983784	1	0.6	0.636364	0.555556	0.16	0	0	0	0	0	0	0	1
chr1	1194683	0.972222	1	0.6	0.545455	0.333333	0.16	0	0	0	0	0	0	0	0
chr1	1194687	0.938547	1	0.6	0.5	0.571429	0.347826	0	0	0	0	0	0	0	0
chr1	1194700	0.961111	1	0.6	0.625	0.75	0.210526	0	0	0	0	0	0	0	0
chr1	1194708	0.976048	1	0	0.5	0.5	0	0	0	0	0	0	0	0	1
chr1	1194724	0.966887	1	0.4	0.7	0.625	0	0	0	0	0	0	0	0	1
chr1	1194739	0.969697	0.857143	0	0.545455	0.625	0	0	0	0	0	0	0	0	0
chr1	1194747	0.976562	1	0.375	0.6	0.7	0	0	0	0	0	0	0	0	0
chr1	1194757	0.924242	0.833333	0.333333	0.818182	0.545455	0	0	0	0	0	0	0	0	0
chr1	1195531	0.95	0.6	0.4	0.555556	0	0	0	0	0	0	0	0	0	0
chr1	1195565	1	1	0	0.333333	0.272727	0	0	0	0	0	0	0.129032	0	0
chr1	1195569	0.964286	1	0	0.444444	0.272727	0	0	0	0	0	0	0.125	0.176471	0
chr1	1195689	0.967213	1	0.375	0.571429	0.4	0	0	0	0	0	0	0	0	0
chr1	1195704	0.913793	1	0.375	0.5	0	0	0	0	0	0	0	0	0	0
chr1	1195715	0.962264	1	0.285714	0.384615	0	0	0	0	0	0	0	0	0	0
chr1	1195755	0.953846	1	0	0.333333	0.25	0	0	0	0	0	0	0	0	0
chr1	1195777	0.96875	1	0	0.555556	0.25	0	0.190476	0	0	0	0	0	0	0
chr1	1196374	0.985075	1	0	0.333333	0.230769	0	0	0	0	0	0	0	0	0
chr1	1196388	0.973333	1	0.25	0.333333	0.4	0	0.157895	0	0	0	0	0	0	1
chr1	1196397	0.985294	1	0.285714	0.4	0.266667	0	0	0	0	0	0	0	0	0
chr1	1196512	0.934426	1	0	0	0.333333	0	0.2	0	0	0	0	0	0	0
chr1	1202564	0.98	1	0.4	0.6	0.545455	0.461538	0	0	0	0	0	0.416667	0	0
chr1	1208661	0	0	0	0	0	0	0	0	0	0	0	0	0.333333	0
chr1	1214581	0.97561	0.857143	0.7	0.444444	0.5	0	0	0	0	0	0	0	0	1
chr1	1218033	0.96	1	0.4	0.555556	0	0.142857	0	0	0	0	0	0	0	0
chr1	1218060	0.979167	1	0.8	0.636364	0.5	0.235294	0	0	0	0	0	0	0	0
chr1	1220070	0.953488	0.4	0.25	0	0	0.242424	0	0	0.117647	0	0	0	0	0
chr1	1220092	0.962025	0.8	0	0	0	0.133333	0.130435	0	0	0	0	0	0	0
chr1	1220102	0.942857	0.555556	0.25	0	0	0.222222	0.136364	0	0	0	0	0	0	0
chr1	1220114	0.96	0	0	0	0	0	0	0	0	0	0	0	0	0
chr1	1220726	0.983051	0	0.4	0.25	0	0.157895	0	0	0	0	0.272727	0.2	0	0
chr1	1226861	1	0.8	0	0	0	0	0	0	0	0	0	0	0	1
chr1	1226866	0.966102	0.8	0	0.272727	0	0	0	0	0	0	0	0	0	0
chr1	1227217	0.938272	0.333333	0.428571	0.5	0	0	0	0	0	0	0	0	0	0
chr1	1227223	0.94186	1	0.375	0.285714	0	0	0	0	0	0	0	0	0	0
chr1	1227231	0.976744	1	0.333333	0.333333	0	0	0	0	0	0	0	0	0.25	0
chr1	1227236	0.988764	0.8	0.5	0.5	0	0	0.130435	0	0	0	0	0	0.230769	0
chr1	1227288	0.944444	1	0.466667	0.4	0	0	0	0	0	0	0	0	0	0
chr1	1227307	0.94186	1	0.307692	0	0	0	0	0	0	0	0	0	0	0
chr1	1227364	0.9	1	0.363636	0	0	0	0	0	0	0	0	0	0	0
chr1	1229446	0	0.833333	0.555556	0.454545	0.285714	0	0	0	0	0	0	0	0	0
chr1	1229451	0	1	0.428571	0.416667	0	0	0	0	0	0	0	0.230769	0	0
chr1	1229471	0	0.833333	0.3	0.285714	0.428571	0	0	0	0	0	0	0	0	0
chr1	1231395	0.910714	1	0.428571	0.333333	0	0	0	0	0	0	0	0	0	0
chr1	1231465	0.870588	1	0.5	0.214286	0	0	0	0	0	0	0	0.25	0	0
chr1	1233833	0.972973	1	0.571429	0.461538	0	0.333333	0	0	0	0	0	0	0	0
chr1	1235529	0.916667	1	0	0.3	0	0	0	0	0	0	0	0	0	0
chr1	1236064	0.964286	1	0.4	0.3	0.2	0.363636	0	0	0	0	0	0	0.25	0
chr1	1236143	0.952381	1	0.333333	0.1875	0	0	0	0	0	0	0	0	0	0
chr1	1237821	0.980392	0.8	0.363636	0.25	0.272727	0	0	0	0	0	0	0	0	0
chr1	1237868	0.95082	1	0.4	0.25	0	0	0	0	0	0	0	0	0	0
chr1	1237896	0.961538	1	0.666667	0.375	0.307692	0	0	0	0	0	0	0	0	0
chr1	1238678	0.983333	0.888889	0.4	0.333333	0.428571	0.1875	0	0	0	0.444444	0	0.157895	0	1
chr1	1238702	0.964912	1	0.333333	0	0.25	0	0	0	0	0	0	0.230769	0	0
chr1	1238712	0.964912	1	0.333333	0.3	0.428571	0.272727	0	0	0	0	0	0.272727	0	0
chr1	1238724	0.932203	1	0	0	0.428571	0	0	0	0	0	0	0	0	0
chr1	1240076	0.93617	0.857143	0.6	0.4	0.5	0	0	0	0	0	0	0	0	0
chr1	1240086	1	0.875	0.6	0	0	0	0	0	0	0	0	0	0	0
chr1	1240097	0.97619	0.875	0.6	0	0	0	0	0	0	0	0	0	0	0
chr1	1242817	0	0	0	0	0	0	0	0	0	0	0	0	0	0
chr1	1244694	0	0	0	0	0	0	0	0	0	0	0	0	0	0
chr1	1244713	0	0	0	0	0	0	0	0	0	0	0	0	0	0
chr1	1244841	0	0	0	0	0	0	0	0	0	0	0	0	0	0
chr1	1244850	0	0	0	0	0	0	0	0	0	0	0.272727	0	0	1
chr1	1244874	0	0	0	0	0	0	0	0	0	0	0	0	0	0
chr1	1244879	0	0	0	0	0	0	0	0	0	0	0	0	0	0
chr1	1244887	0	0	0	0	0	0	0	0	0	0	0	0	0	0
chr1	1244892	0	0	0	0	0	0	0	0	0	0	0	0	0	0
chr1	1245940	0.90566	1	0	0	0	0	0	0	0	0	0	0.235294	0	0
chr1	1246252	0.922078	1	0.4	0.285714	0.3	0.185185	0	0	0	0	0	0	0	0
chr1	1246668	0.960526	1	0.333333	0	0	0	0.2	0	0	0	0	0	0	0
chr1	1246687	0.929577	1	0	0	0	0	0	0	0	0	0	0.25	0	0
chr1	1247819	0.970149	0.8	0.285714	0.25	0	0.230769	0	0	0	0	0	0	0	0
chr1	1248700	0.971014	0.8	0.416667	0	0	0.2	0.4	0	0	0	0	0	0	0
chr1	1250372	0.946429	1	0	0	0	0	0	0	0	0	0	0	0.173913	0
chr1	1251302	0.939394	0.857143	0.285714	0.454545	0.666667	0	0	0	0	0	0	0	0	0
chr1	1251309	0.970588	0.5	0.428571	0.454545	0	0	0	0	0	0	0	0	0	0
chr1	1251322	0.947368	1	0.5	0.545455	0.3	0	0	0	0	0	0	0	0	1
chr1	1251332	0.891892	0.875	0.5	0.5	0	0	0	0	0	0	0	0	0	0
chr1	1251421	0.924528	1	0.444444	0.5	0.294118	0	0	0	0	0	0	0.166667	0	0
chr1	1251532	1	1	0	0	0.222222	0	0	0	0	0	0	0	0	0
chr1	1254547	0.979592	1	0.4	0	0.272727	0	0	0	0	0	0	0	0	0
chr1	1254608	0.977273	1	0.428571	0.285714	0.285714	0.157895	0	0	0	0	0	0	0	0
chr1	1254682	0.941176	1	0	0	0	0	0	0	0	0	0	0	0	0
chr1	1254756	0.981481	1	0.333333	0.285714	0.2	0.176471	0.142857	0	0	0	0	0	0.142857	0
chr1	1254771	0.962963	0.916667	0.5	0.384615	0.384615	0	0.142857	0	0	0	0	0	0.136364	0
chr1	1254774	1	1	0.333333	0.416667	0.384615	0.352941	0.214286	0	0	0	0	0	0.142857	0
chr1	1254782	0.980392	1	0.5	0.384615	0.285714	0.375	0.346154	0	0	0	0	0	0.210526	0
chr1	1255106	0.917808	1	0.571429	0	0.272727	0	0	0	0	0	0	0	0	1
chr1	1255120	0.949367	1	0.428571	0.25	0.272727	0	0	0	0	0	0	0	0	0
chr1	1255123	0.961039	0.8	0.571429	0.375	0.333333	0	0	0	0	0	0	0	0	0
chr1	1255129	0.974684	1	0.625	0.444444	0.7	0	0	0	0	0	0	0	0	0
chr1	1255132	0.975	1	0.625	0.428571	0.5	0	0	0	0	0	0	0	0	0
chr1	1255141	0.987179	1	0.428571	0	0.333333	0	0	0	0	0	0	0	0	0
chr1	1255143	0.9875	1	0.5	0	0.375	0	0	0	0	0	0	0	0	1
chr1	1255757	0.953846	0	0.5	0.416667	0.4	0.157895	0	0	0	0	0	0.26087	0	0
chr1	1255763	0.939394	0.875	0.375	0.4	0.363636	0	0	0	0	0	0	0	0	0
chr1	1258161	0.877551	1	0.25	0	0	0	0	0	0	0	0	0	0	0
chr1	1258201	0.96875	0.833333	0.333333	0.454545	0.4375	0	0	0	0	0	0	0	0	0
chr1	1258203	1	1	0	0.25	0.3125	0	0	0	0	0	0	0	0	0
chr1	1258209	0.935484	1	0	0	0	0	0	0	0	0	0	0	0	0
chr1	1258216	0.970588	1	0	0	0	0	0	0	0	0	0	0	0	0
chr1	1258241	0.973684	1	0.555556	0	0.1875	0.25	0	0	0	0	0	0	0	0
chr1	1258257	0.963415	1	0.25	0.1875	0.235294	0	0	0	0	0	0	0	0	0
chr1	1258314	0.954545	1	0.333333	0	0	0	0	0	0	0	0	0	0	0
chr1	1260057	0	0	0	0	0	0	0	0	0	0	0	0	0	0
chr1	1261589	0.907407	1	0	0	0	0	0.375	0	0	0	0	0	0	0
chr1	1263260	0.983607	1	0.4	0.428571	0.333333	0.25	0	0	0	0	0	0	0	1
chr1	1265456	0.809278	0	0	0.25	0.25	0.264706	0	0	0	0	0.266667	0.142857	0.25	0
chr1	1265476	0.961111	0	0	0.5	0.444444	0.30303	0	0	0	0	0	0	0	1
chr1	1265504	0.972376	0.375	0.4	0.428571	0.625	0.535714	0.382353	0.210526	0.233333	0.217391	0	0.375	0	0
chr1	1265511	0.98324	0.375	0.4	0.428571	0.555556	0.566667	0.526316	0.588235	0.285714	0.15	0.3125	0.454545	0	0
chr1	1265515	0.989011	0.5	0.4	0.428571	0.444444	0.533333	0.4	0.529412	0.241379	0.238095	0.294118	0.272727	0.25	0
chr1	1265528	0.82199	0	0	0.555556	0.363636	0.142857	0.135135	0	0	0	0	0.148148	0	0
chr1	1265535	0.994475	0.666667	0.6	0.5	0.6	0.571429	0.571429	0.421053	0.428571	0.25	0.411765	0.333333	0.571429	0
chr1	1265550	0.961538	0.666667	0	0.625	0.5	0.533333	0.366667	0.4	0.259259	0.434783	0.285714	0.269231	0.333333	1
chr1	1265552	0.769231	0	0	0.5	0.555556	0.214286	0	0	0	0.166667	0	0	0	0
chr1	1265563	0.99422	0.857143	0.6	0.857143	0.6	0.733333	0.833333	0.833333	0.730769	0.727273	0.5625	0.807692	0.625	1
chr1	1265614	0.939189	0.428571	0.4	0.5	0.444444	0.578947	0.518519	0.2	0.157895	0.235294	0	0	0	0
chr1	1265622	0.963768	0.428571	0.8	0.5	0	0.45	0.5	0.307692	0	0.157895	0.1875	0.136364	0	0
chr1	1265633	0.91129	0	0	0.5	0	0.142857	0.193548	0	0	0	0	0	0	0
chr1	1265663	0.990099	0.857143	0.571429	0.545455	0.333333	0.666667	0.62963	0.7	0.571429	0.45	0.466667	0	0.333333	0
chr1	1266497	0.95	1	0	0.272727	0.294118	0.888889	0.894737	0.833333	0.727273	0.846154	0.555556	0.25	0.666667	1
chr1	1266504	0.966667	1	0.285714	0	0.3125	0.6	0.75	0.666667	0.25	0.692308	0	0	0.636364	0
chr1	1267745	1	0	0.333333	0	0	0	0	0	0	0	0	0	0	1
chr1	1267748	0.985714	0	0.4	0	0	0.1875	0	0	0	0	0	0	0	1
chr1	1267754	0.96	0	0.4	0	0	0.25	0	0	0	0	0	0	0	0
chr1	1267811	0.986667	0	0	0	0	0.238095	0	0	0	0	0	0	0	0
chr1	1268339	0.9625	0	0.4	0	0	0	0	0	0	0	0	0	0	0
chr1	1268357	0.963415	0	0	0	0.25	0.137931	0	0	0	0	0	0	0	0
chr1	1268366	1	0	0	0	0.285714	0.241379	0.142857	0	0	0	0	0	0	0
chr1	1268372	0.949367	0	0	0	0	0	0	0	0	0	0	0	0	0
chr1	1268387	0.928571	0	0	0	0	0	0	0	0	0	0	0	0	1
chr1	1268450	0.984848	0	0.285714	0.333333	0	0.136364	0	0	0	0.2	0	0	0	0
chr1	1268469	1	0.4	0	0.25	0	0.217391	0	0	0	0	0	0	0	0
chr1	1268481	0.985294	0	0	0	0	0.16	0	0	0	0	0	0	0.4	0
chr1	1268491	0.983607	0	0	0	0	0	0	0	0	0	0	0	0	0
chr1	1269314	0.987342	0.6	0	0	0	0.384615	0.25	0	0	0	0	0	0	1
chr1	1270117	0.952381	0.333333	0.375	0	0	0.428571	0.1875	0.285714	0	0.272727	0	0	0	1
chr1	1270149	0.949153	0.4	0.4	0	0	0.363636	0	0	0	0	0	0	0.375	0
chr1	1272464	0.958333	1	0.428571	0	0.3	0	0	0	0	0	0	0.285714	0	0
chr1	1272473	0.958904	1	0.5	0.25	0	0	0	0	0	0	0.230769	0.4	0	1
chr1	1273940	0.935897	1	0.428571	0.428571	0.533333	0.307692	0	0	0	0	0	0	0	0
chr1	1274666	0.916667	1	0.25	0	0	0.16	0.1875	0	0	0	0	0.133333	0.136364	0
chr1	1274682	0.948718	1	0.375	0	0	0.173913	0	0	0	0	0	0	0	0
chr1	1274711	0.974026	1	0.333333	0	0.375	0.153846	0	0	0	0	0	0	0	0
chr1	1274713	0.96	1	0.555556	0	0.333333	0	0	0	0	0	0	0	0	0
chr1	1275578	0.901408	1	0.4	0	0	0.210526	0	0	0	0	0	0	0	0
chr1	1275580	0.835616	0.857143	0.4	0	0.25	0.263158	0	0	0	0	0	0	0	0
chr1	1275611	0.955224	1	0.4	0.25	0.5	0.25	0	0	0	0	0	0	0	0
chr1	1275616	0.929577	1	0.4	0	0.333333	0.238095	0.157895	0	0	0	0	0	0	0
chr1	1277179	0.913793	1	0.5	0.333333	0	0.6	0.461538	0	0.555556	0.545455	0	0	0.4	0
chr1	1281964	0.981818	0.8	0	0.2	0	0	0	0	0	0	0	0	0	0
chr1	1281993	0.982456	1	0	0	0.3	0	0	0	0	0	0	0	0	1
chr1	1281997	1	1	0	0	0	0.2	0	0	0	0	0	0	0	0
chr1	1282025	0.964912	1	0	0	0	0	0	0	0	0	0	0	0	0
chr1	1282372	0.945946	1	0	0.25	0	0	0	0	0	0	0	0	0	0
chr1	1287011	0	0	0	0	0	0	0	0	0	0	0	0	0	1
chr1	1287036	0	0	0	0	0	0	0	0	0	0	0	0	0.25	0
chr1	1296905	0.966667	0	0	0	0	0	0	0	0	0	0	0.142857	0	0
chr1	1296907	0.95082	0	0	0	0	0	0	0	0	0	0	0	0	1
chr1	1296918	0.983051	0	0	0	0	0	0	0	0	0	0	0	0	0
chr1	1296930	0.951613	0	0	0	0	0	0	0	0	0	0	0	0	0
chr1	1301306	0.307692	0.4	0	0	0	0.171429	0.277778	0	0	0	0	0	0	0
chr1	1301316	0.394366	0.5	0	0	0	0.416667	0.619048	0.5	0.304348	0.25	0	0	0	0
chr1	1301843	0	0	0	0	0	0.09375	0	0	0	0	0	0.151515	0	0
chr1	1306788	0.941176	1	0.4	0.5	0	0.1875	0	0	0	0	0	0	0.285714	0
chr1	1311691	0.203704	0	0	0	0	0	0	0	0	0	0	0	0	0
chr1	1311800	0.516129	0	0	0	0	0	0	0	0	0	0	0	0	0
chr1	1319418	0.867925	0.8	0.8	0.888889	1	0.764706	0.7	0.75	0.625	0.428571	0.4	0.714286	0	1
chr1	1335473	0	0	0	0	0	0	0	0	0	0	0	0	0	0
chr1	1335497	0	0	0	0	0	0	0	0	0	0	0	0	0	0
chr1	1335501	0	0	0	0	0	0	0	0	0	0	0	0	0	0
chr1	1335510	0	0	0	0	0	0	0	0	0	0	0	0	0	0
chr1	1335521	0	0	0	0	0	0	0	0	0	0	0	0	0	0
chr1	1335539	0	0	0	0	0	0	0	0	0	0	0	0	0	0
chr1	1335547	0	0	0	0	0	0	0	0	0	0	0	0	0	0
chr1	1335556	0	0	0	0	0	0	0	0	0	0	0	0	0	0
chr1	1335569	0	0	0	0	0	0	0	0	0	0	0	0	0	0
chr1	1335586	0	0	0	0	0	0	0	0	0	0	0	0	0	0
chr1	1335597	0	0	0	0	0	0	0	0	0	0	0	0	0	0
chr1	1335650	0	0	0	0	0	0	0	0	0	0	0	0	0	0
chr1	1336592	0.911111	0.6	0	0.285714	0	0	0	0	0	0	0	0	0	0
chr1	1336625	0.903846	0.333333	0	0	0	0	0	0	0	0	0	0	0	0
chr1	1336639	0.962963	0	0.333333	0	0	0.428571	0	0	0	0	0	0.235294	0.263158	0
chr1	1336677	0.734694	0.666667	0	0	0	0.16	0	0	0	0	0	0	0	0
chr1	1336719	0.863636	0	0	0	0	0	0	0	0	0	0	0	0	0
chr1	1336760	0.933333	0.818182	0	0	0	0	0	0	0	0	0.25	0	0	0
chr1	1336777	1	0.375	0	0	0	0	0	0	0	0	0.285714	0	0	0
chr1	1336813	0.916667	0.8	0	0.222222	0	0.173913	0	0	0	0	0.238095	0	0	0
chr1	1336826	0.960784	1	0.3	0.142857	0	0.458333	0.227273	0	0.294118	0	0.391304	0.357143	0.375	0
chr1	1337153	0.955556	1	0.4	0.538462	0	0	0	0	0	0	0	0	0	0
chr1	1337166	0.9	1	0.333333	0.416667	0.214286	0	0	0	0	0	0	0	0	0
chr1	1337736	0.981132	0.857143	0.333333	0	0	0	0	0	0	0	0	0	0	0
chr1	1337826	0.981818	0.875	0	0	0.285714	0	0	0	0	0	0	0	0	0
chr1	1346489	0.963636	0.571429	0.25	0	0	0.4	0	0	0	0	0	0	0.25	0
chr1	1347070	0.982759	0.8	0.5	0	0.666667	0.575758	0.518519	0.545455	0.521739	0.62963	0.611111	0.75	0	0
chr1	1348647	0.970588	0.909091	0.538462	0.25	0.5	0.444444	0.6	1	0.666667	0.5	0.6	0.647059	0.666667	1
chr1	1348656	1	0.8	0.714286	0.333333	0.75	0.8	0.857143	1	0.666667	0.8	0.9	0.761905	0.833333	0
chr1	1348666	0.918919	0.8	0.615385	0.444444	0.583333	0.75	0.428571	0.833333	0.714286	0.636364	1	0.714286	0.8	1
chr1	1348680	0.970588	1	0.583333	0.272727	0.5	0.533333	0.7	0.428571	0.7	0.636364	0.888889	0.761905	0.714286	0
chr1	1354787	0.481481	0	0	0	0	0.333333	0	0	0	0	0	0.15	0	0
chr1	1355024	0.395349	0	0	0	0	0.428571	0.5	0	0	0	0	0	0	0
chr1	1355508	0	0	0	0	0	0	0	0	0	0	0	0	0	0
chr1	1355510	0	0	0	0	0	0	0	0	0	0	0	0	0	0
chr1	1358210	0.982143	0.25	0	0	0	0.375	0	0	0	0	0	0	0	0
chr1	1366124	0.941176	0	0	0	0	0	0	0	0	0	0	0	0	0
chr1	1368297	1	0	0	0	0	0	0	0	0	0	0	0	0	0
chr1	1372743	0.938462	0	0	0	0.266667	0.136364	0.238095	0	0	0	0	0	0.4	0
chr1	1372747	0.969231	0	0	0	0	0.173913	0.142857	0	0	0	0	0	0.333333	0
chr1	1372773	0.967742	0	0	0	0	0.25	0.230769	0	0	0	0	0	0	0
chr1	1372791	0.931034	0	0	0.2	0	0.136364	0.2	0	0	0	0	0	0	1
chr1	1372815	0.903846	0	0	0	0	0	0	0	0	0	0	0	0	1
chr1	1372870	0.957447	0.428571	0	0	0	0	0.130435	0	0	0	0	0.210526	0	0
chr1	1372908	1	0	0	0.4	0	0	0.227273	0	0	0	0	0.181818	0	1
chr1	1372963	0.980769	0	0.25	0.333333	0.166667	0.166667	0.15	0	0	0	0	0	0	0
chr1	1372976	0.94	0	0.375	0	0.166667	0	0	0	0	0	0	0	0	0
chr1	1373044	0.846154	0	0	0	0	0	0	0	0.166667	0	0	0	0	0
chr1	1373049	0.925	0	0	0	0	0	0	0	0.176471	0	0	0	0	0
chr1	1373066	0.854167	0	0	0	0	0.142857	0	0	0.136364	0	0	0	0	0
chr1	1373130	0.962963	0	0	0	0	0.238095	0	0	0.176471	0	0	0.136364	0	0
chr1	1379667	0.916667	0	0	0	0	0	0	0	0	0	0	0	0	0
chr1	1388499	0.957447	1	0.272727	0.647059	0	0	0	0	0	0	0	0	0	1
chr1	1389341	0.529412	0.6	0	0	0	0	0	0	0	0	0	0	0	0
chr1	1391072	0.945205	1	0.5	0.375	0.666667	0.416667	0	0	0	0	0	0	0.272727	0
chr1	1391079	0.929577	1	0.333333	0.714286	0.333333	0.333333	0.173913	0	0.176471	0	0	0.25	0.272727	0
chr1	1396955	0.941176	1	0.666667	0	0.5	0.272727	0	0	0	0	0	0	0	1
chr1	1398152	0.952381	1	0	0	0.307692	0.222222	0	0	0	0	0	0	0.15	1
chr1	1398172	0.984615	1	0	0.5	0.357143	0.411765	0	0	0	0	0.294118	0.15	0.181818	0
chr1	1398180	0.96875	1	0	0	0.285714	0.176471	0	0	0	0	0	0	0	0
chr1	1398224	1	1	0.333333	0.230769	0	0.176471	0	0	0	0	0	0	0	0
chr1	1398254	0.973684	1	0.285714	0.285714	0.307692	0	0.230769	0	0	0	0	0	0	0
chr1	1398262	1	1	0.428571	0	0.230769	0.227273	0	0	0	0	0	0.15	0	0
chr1	1398308	0.966667	1	0.333333	0.214286	0.357143	0	0	0	0	0.176471	0	0	0	0
chr1	1398332	0.931034	1	0	0	0.416667	0.352941	0	0.285714	0	0.235294	0	0.210526	0	0
chr1	1398510	0.978723	1	0.4	0.214286	0	0	0	0	0	0	0	0	0	0
chr1	1398641	0.888889	1	0	0	0.363636	0.214286	0.222222	0	0	0	0	0	0	1
chr1	1398892	1	0.857143	0	0	0.368421	0.75	1	1	0.857143	1	0.882353	0.9	1	0
chr1	1398924	0.963636	0.8	0	0.375	0.217391	0.583333	0.352941	0.333333	0.272727	0.458333	0.176471	0.368421	0.428571	0
chr1	1399979	0.90625	1	0.454545	0.454545	0.333333	0	0	0	0	0	0	0	0	0
chr1	1399996	1	1	0.5	0.333333	0	0	0	0	0	0	0	0.230769	0	0
chr1	1400011	0.870968	1	0.4	0.25	0.444444	0	0	0	0	0	0	0	0	0
chr1	1400699	0.979592	1	0	0.2	0.272727	0	0	0	0	0	0	0	0	0
chr1	1405926	0.828571	0	0	0	0	0	0	0	0	0	0	0	0	0
chr1	1406088	0.609756	0	0	0	0	0	0	0	0	0	0	0	0	0
chr1	1409342	0.930233	0.4	0	0	0	0.363636	0	0	0	0	0	0	0	1
chr1	1412533	0.967742	1	0	0	0.230769	0.4	0.157895	0	0	0	0	0	0	0
chr1	1412543	0.970588	0.875	0	0.214286	0.307692	0.684211	0.333333	0	0.333333	0	0	0	0	1
chr1	1413330	0.924242	1	0	0.285714	0	0	0	0	0	0	0	0	0	0
chr1	1413335	0.951613	1	0.4	0.333333	0.333333	0	0	0	0	0	0	0	0	0
chr1	1413925	0.960526	1	0.666667	0.4	0.473684	0.214286	0.12069	0	0	0	0	0	0	0
chr1	1413937	0.973333	1	0.6	0.4	0.6875	0.222222	0.190476	0	0	0	0	0	0	0
chr1	1413942	0.973684	1	0.545455	0.333333	0.6875	0.421053	0.116279	0	0	0.166667	0	0	0	0
chr1	1413964	0.942857	1	0.8	0.6	0.533333	0.1875	0	0	0	0	0	0	0	0
chr1	1417472	0.981132	0.833333	0.666667	0	0.333333	0	0.176471	0	0	0	0	0	0.4	0
chr1	1417522	0.978723	1	0.6	0.666667	0.833333	0.241379	0	0	0	0.181818	0	0	0	0
chr1	1417529	0.960784	1	0.777778	0.666667	0.666667	0.205882	0.25	0	0	0.2	0	0	0	0
chr1	1417565	0.970588	1	0.75	0.8	1	0.307692	0	0	0	0.24	0	0	0	1
chr1	1417576	0.943662	0.6	0.875	0.8	1	0.410256	0.137931	0	0	0.26087	0.230769	0	0	0
chr1	1417583	0.971429	1	0.857143	0.6	0.6	0.205882	0.192308	0	0	0.277778	0	0	0	0
chr1	1417587	0.955224	1	0.857143	0.666667	0.4	0.457143	0.269231	0	0	0.473684	0	0	0	0
chr1	1419712	0.978261	1	0.444444	0.818182	0.3125	0.25	0	0	0	0	0	0.363636	0	0
chr1	1419717	0.977778	1	0.3	0.7	0	0.333333	0	0	0	0	0	0.333333	0	0
chr1	1419721	0.955556	0.875	0.25	0.8	0.315789	0.444444	0	0	0	0	0	0.384615	0	0
chr1	1420445	0.971014	1	0.8	0.428571	0.625	0	0	0	0	0	0	0	0	1
chr1	1420462	1	1	0.5	0.714286	0.875	0	0	0	0	0	0	0	0	0
chr1	1420470	0.97619	1	0.666667	0.533333	0.666667	0.136364	0	0	0	0	0	0	0	0
chr1	1421013	0.932203	1	0	0.5	0	0	0	0	0	0.285714	0	0	0	1
chr1	1421016	0.983871	1	0.333333	0.416667	0.4	0	0	0	0	0.285714	0	0	0	0
chr1	1425803	0.949153	0.833333	0.333333	0.428571	0	0.333333	0.285714	0	0	0	0.375	0	0	0
chr1	1425815	0.863636	0.833333	0.5	0.428571	0	0	0.142857	0	0	0	0.285714	0	0	0
chr1	1425824	0.878788	1	0.625	0.5	0.272727	0.307692	0	0	0	0	0.285714	0	0	0
chr1	1426115	1	1	0.6	0.411765	0.5	0.583333	0.466667	0.4	0.6	0.642857	0	0.625	0	0
chr1	1426180	0.942308	1	0.4	0.35	0.25	0.142857	0	0	0	0	0	0	0	0
chr1	1426218	0.96	1	0.5	0.555556	0.272727	0.695652	0.5	0.857143	0.307692	0.541667	0	0.3	0.444444	0
chr1	1426226	1	1	0	0.421053	0.3	0.695652	0.681818	0.75	0.230769	0.615385	0.25	0.8	0.8	0
chr1	1426238	0.96	1	0.285714	0.263158	0.545455	0.578947	0.375	0.375	0	0.333333	0.333333	0	0	0
chr1	1426283	0.916667	1	0	0.176471	0	0.705882	0.62963	0.375	0.357143	0.541667	0.6875	0.458333	0.555556	1
chr1	1426321	1	1	0	0	0	0.842105	0.935484	0.8	0.733333	1	0.916667	1	0.357143	1
chr1	1427045	0.946429	1	0.454545	0.833333	0.333333	0.842105	0.541667	0.666667	0.588235	0.866667	0.666667	0.5625	0.777778	0
chr1	1427056	0.942308	1	0.454545	0.833333	0.1875	0.761905	0.724138	0.7	0.761905	0.833333	0.416667	0.928571	0.666667	0
chr1	1429197	0.923077	1	0.5	0.692308	0.363636	0	0	0	0	0	0	0	0	1
chr1	1435515	0.981132	0	0	0	0.333333	0.714286	0.333333	0	0	0	0	0	0	0
chr1	1439117	0.951613	0	0	0	0	0.269231	0.190476	0	0	0	0	0	0	0
chr1	1443579	0.95082	1	0.4	0.666667	0.6	0.5	0.571429	0.5	0	0.357143	0.444444	0.3	0	0
chr1	1444148	0.920635	1	0.444444	0.5	0.25	0.333333	0	0	0	0	0	0	0	0
chr1	1444231	0.844828	0.875	0.25	0.4	0.25	0	0	0	0	0	0	0	0	0
chr1	1444250	0.745763	0.625	0	0.571429	0.714286	0	0	0	0	0	0	0	0	1
chr1	1444261	0.785714	0.888889	0	0.75	0.571429	0.210526	0	0	0	0	0	0	0	0
chr1	1444292	0.529412	1	0.428571	0.5	0.333333	0	0	0	0	0.2	0	0	0	0
chr1	1444309	0.5	0.875	0.428571	0.571429	0.333333	0	0	0	0	0	0	0	0	1
chr1	1444313	0.363636	0.857143	0.428571	0.428571	0.285714	0	0	0	0	0	0	0	0	0
chr1	1444889	0.40625	0.8	0.4	0.333333	0.3	0	0	0	0	0	0	0	0	0
chr1	1446547	0	0	0	0	0	0	0	0	0	0	0	0	0	0
chr1	1446604	0	0	0	0	0	0	0	0	0	0	0	0	0	0
chr1	1446619	0	0.285714	0	0	0	0	0	0	0	0	0	0	0	0
chr1	1447482	0	0	0	0	0	0	0	0	0	0	0	0	0	0
chr1	1447484	0	0	0	0	0	0	0	0	0	0	0	0	0	0
chr1	1447486	0	0	0	0	0	0	0	0	0	0	0	0	0	0
chr1	1450879	0.941176	1	0	0	0.157895	0	0	0	0	0	0	0	0	0
chr1	1450911	1	1	0.25	0	0.266667	0	0	0	0	0	0	0	0	0
chr1	1451052	1	0.888889	0.333333	0.428571	0.277778	0	0	0	0	0	0	0	0	0
chr1	1451061	0.971429	0.888889	0	0.428571	0	0	0	0	0	0	0	0	0	0
chr1	1451292	0.978723	1	0.4	0.272727	0.538462	0	0	0	0	0	0	0	0	0
chr1	1451343	0.982456	1	0.428571	0.25	0.470588	0.363636	0.157895	0	0	0	0	0.190476	0	0
chr1	1451350	0.952381	1	0.333333	0.461538	0.444444	0.3	0.181818	0	0	0	0	0.130435	0	0
chr1	1451373	0.971831	1	0.666667	0.230769	0.352941	0	0	0	0	0	0	0	0	0
chr1	1451383	0.932432	1	0.571429	0.416667	0.333333	0.176471	0.142857	0	0	0	0	0.181818	0	1
chr1	1451405	0.985294	1	0.5	0.461538	0.2	0	0.125	0	0	0	0	0.2	0	0
chr1	1451437	0.96	1	0.625	0.466667	0	0	0	0	0	0	0	0.130435	0	1
chr1	1453250	0.804878	1	0.285714	0.411765	0.4	0	0.181818	0	0	0	0	0	0	0
chr1	1453265	0.846154	1	0.428571	0.428571	0.380952	0	0	0	0	0	0	0	0	0
chr1	1456973	0.97619	1	0.6	0.375	0.769231	0.6	0.333333	0	0	0.285714	0	0	0	1
chr1	1457073	0.96	1	0.5	0.333333	0.4	0.35	0	0	0	0.176471	0	0	0	0
chr1	1459279	0.854167	0.8	0.444444	0.3	0.416667	0	0	0	0	0	0.333333	0	0	0
chr1	1459308	0.962264	1	0.5	0.454545	0.5	0	0	0	0	0	0.25	0	0	0
chr1	1462043	0.959184	0.8	0.333333	0	0.25	0	0	0	0	0	0	0	0	1
chr1	1462060	1	1	0.333333	0.333333	0.5	0	0.2	0	0.15	0	0	0.214286	0	0
chr1	1462070	0.956522	1	0	0	0.5	0	0	0	0	0	0	0	0	0
chr1	1462102	1	1	0.4	0	0.6	0.428571	0.15	0.6	0.176471	0.272727	0	0.333333	0	0
chr1	1462828	0.957447	1	0	0	0	0.235294	0.259259	0	0	0	0	0.428571	0	0
chr1	1462850	0.946429	1	0	0	0	0.176471	0.222222	0	0	0	0	0	0	0
chr1	1462907	0.965517	1	0.4	0.4	0.5	0	0	0	0	0	0	0.285714	0	0
chr1	1465446	0.960784	1	0.833333	0.333333	0.5	0.5	0.428571	0.5	0.333333	0.705882	0.333333	0.4375	0.473684	0
chr1	1465551	0.96	0.5	0.538462	0.466667	0.4	0.647059	0.466667	0.4	0.8	0.833333	0.333333	0.653846	0.625	0
chr1	1465636	0.955556	0.833333	0.818182	0.538462	0.75	0.666667	0.619048	0.625	0.545455	0.384615	0.875	0.733333	0.625	0
chr1	1465655	0.926829	1	0.7	0.5	0.636364	0.916667	0.6	0.857143	0.7	0.769231	0.727273	0.85	1	1
chr1	1468232	0.962963	1	0.8	1	0.888889	0.842105	0.588235	0.5	0.875	0.818182	0.714286	0.666667	1	0
chr1	1468237	0.982456	1	0.8	0.909091	0.777778	0.857143	0.8	0.666667	0.714286	0.727273	0.875	0.555556	0.857143	1
chr1	1468264	0.982143	1	0.6	0.888889	0.75	0.777778	0.684211	0.8	0.666667	0.833333	0.888889	1	0.875	0
chr1	1468286	0.935484	1	1	1	0.833333	0.941176	0.75	0.666667	0.875	0.75	0.888889	0.833333	0.8	0
chr1	1468297	0.957143	1	1	0.888889	1	0.875	0.714286	1	1	0.733333	0.833333	0.888889	0.8	0
chr1	1468313	0.958333	1	0.8	0.727273	0.857143	0.857143	0.785714	1	0.7	0.785714	0.833333	0.666667	0	1
chr1	1468351	0.970149	1	0.8	0.888889	1	0.857143	0.52381	1	0.722222	0.789474	0.6	0.9375	0.8	1
chr1	1472646	0.931818	0.5	0	0	0.25	0	0	0	0	0	0	0.166667	0	0
chr1	1472689	0.94	0.5	0	0	0.375	0	0.157895	0	0	0	0	0	0	0
chr1	1472703	0.890909	0	0	0	0	0	0	0	0	0	0	0	0	0
chr1	1472722	0.963636	0.6	0	0	0	0	0	0	0	0	0	0.15	0	0
chr1	1472729	0.957447	0	0	0	0	0	0	0	0	0	0	0.157895	0	1
chr1	1474399	0.891892	0	0.285714	0.357143	0.421053	0	0	0	0	0	0	0	0	0
chr1	1474419	0.923077	0	0	0.285714	0	0	0.142857	0	0	0	0	0	0	0
chr1	1474432	0.9125	0	0	0.266667	0	0	0.16	0	0	0	0	0	0	0
chr1	1474434	0.802469	0	0.4	0.333333	0	0	0.16	0	0	0	0	0	0	0
chr1	1474458	0.911392	0	0	0	0.2	0	0.173913	0	0	0	0	0	0	0
chr1	1474468	0.650602	0	0	0	0.2	0	0	0	0	0	0	0	0	0
chr1	1478742	0.942857	1	0.428571	0.333333	0.4	0	0	0	0	0.176471	0	0	0	0
chr1	1478765	0.967213	1	0	0.384615	0.214286	0	0	0	0	0.142857	0	0	0	0
chr1	1478778	0.966102	0.5	0	0.428571	0.384615	0	0	0	0	0	0	0	0	0
chr1	1478827	0.916667	1	0	0.466667	0	0	0	0	0	0	0	0	0	0
chr1	1479985	0.95	1	0	0	0.416667	0	0	0	0	0	0	0	0	1
chr1	1482829	0.976744	1	0.5	0.25	0.384615	0	0.266667	0	0	0	0	0	0	1
chr1	1484230	0.98	1	0.8	0.454545	0	0.428571	0	0	0	0	0	0	0	0
chr1	1486028	0.904762	1	0.428571	0	0	0	0	0	0	0	0	0	0	0
chr1	1486042	0.923077	1	0.4	0	0	0	0	0	0	0	0	0	0	0
chr1	1489697	0.866667	1	0.5	0.666667	0.769231	0	0	0	0	0	0	0.230769	0.25	0
chr1	1498451	0.979592	1	0.333333	0.384615	0.3	0	0.230769	0	0	0	0	0	0	0
chr1	1499199	0.983333	1	0.454545	0.545455	0.5	0.416667	0.2	0	0	0.181818	0	0.26087	0	0
chr1	1510410	0	0	0	0	0	0	0	0	0	0	0	0	0	0
chr1	1510838	0	0	0	0	0	0	0	0	0	0	0	0	0	0
chr1	1510840	0	0	0	0	0	0	0	0	0	0	0	0	0	0
chr1	1510874	0	0	0	0	0	0	0	0	0	0	0	0	0	0
chr1	1510879	0	0.333333	0	0	0	0	0	0	0	0	0	0	0	0
chr1	1510883	0	0	0	0	0	0	0	0	0	0	0	0	0	0
chr1	1510970	0	0.375	0	0	0	0	0	0	0	0	0	0	0	0
chr1	1510984	0	0	0	0	0	0	0	0	0	0	0	0	0	0
chr1	1510991	0	0.375	0	0	0	0	0	0	0	0	0	0	0	0
chr1	1513088	0.87931	0	0	0	0	0	0	0	0	0	0	0	0	0
chr1	1514425	1	0.428571	0	0	0	0	0	0	0	0	0	0	0	0
chr1	1525072	0.902439	0.454545	0	0	0	0.333333	0	0	0	0	0	0	0	1
chr1	1525113	0.978261	0.5	0	0	0	0.333333	0	0	0	0	0	0.333333	0	0
chr1	1526983	0.95	0	0	0.454545	0	0.625	0.333333	0.4	0.25	0.214286	0	0	0.6	0
chr1	1528434	0.970588	0	0	0	0	0	0	0	0	0	0	0	0	0
chr1	1529721	0.961538	0	0	0	0	0	0	0	0	0	0	0.238095	0	0
chr1	1529754	0.96	0	0.25	0	0	0	0	0	0	0	0	0	0	0
chr1	1529763	0.96	0	0.285714	0	0.230769	0	0	0	0	0	0	0.272727	0	1
chr1	1529773	0.962264	0.230769	0.25	0	0	0	0	0	0	0	0	0.3	0	0
chr1	1529775	0.943396	0	0.25	0	0	0	0	0	0	0	0	0.454545	0	0
chr1	1529783	0.913793	0	0.333333	0	0	0	0	0	0	0	0	0.444444	0	0
chr1	1529811	0.952381	0	0	0	0	0	0	0	0	0	0	0	0	0
chr1	1529818	0.953488	0	0	0	0.230769	0	0	0	0	0	0	0	0	1
chr1	1529905	0.961538	0	0	0	0	0	0	0	0	0	0	0	0	0
chr1	1529910	0.981481	0	0	0	0.333333	0.15	0	0	0	0	0	0	0	1
chr1	1530911	0.957895	0	0	0	0	0.166667	0	0	0	0	0	0	0	0
chr1	1531700	0.952381	0.411765	0	0.277778	0	0.108108	0	0	0	0	0	0	0	0
chr1	1533863	0	0	0	0	0	0	0	0	0	0	0	0	0	0
chr1	1533878	0	0	0	0	0	0	0	0	0	0	0	0	0	0
chr1	1534029	0	0	0	0.272727	0	0	0	0	0	0	0	0	0	0
chr1	1534479	0	0.4	0	0	0	0	0	0	0	0	0	0	0	0
chr1	1534494	0	0.4	0	0	0	0	0	0	0	0	0	0	0	0
chr1	1536994	0.780488	1	0.8	0	0	0	0	0	0	0	0	0	0	0
chr1	1537082	0.901961	1	0.428571	0	0	0	0	0	0	0	0	0	0	0
chr1	1537535	1	1	0	0	0	0	0	0	0	0	0	0.190476	0	0
chr1	1537543	0.95122	1	0.444444	0.285714	0.272727	0.5	0	0	0.25	0.3125	0	0.454545	0	0
chr1	1537623	1	1	0	0.333333	0	0.5	0	0	0	0.230769	0	0.130435	0	0
chr1	1537661	0.981818	1	0.5	0.333333	0.625	0.444444	0	0.285714	0.25	0	0.375	0	0	0
chr1	1537664	0.927273	1	0.375	0	0	0.4	0	0.285714	0	0	0	0	0	0
chr1	1537669	0.903846	1	0.5	0.5	0.428571	0.333333	0	0.285714	0	0	0	0	0	0
chr1	1537722	0.983607	0.833333	0.5	0	0.285714	0.238095	0	0.272727	0.136364	0	0	0	0	1
chr1	1537753	0.86	1	0	0	0	0	0	0	0	0	0	0	0	1
chr1	1541226	0.942857	1	0.666667	0.857143	0.4	0.264706	0	0	0	0	0	0.2	0	0
chr1	1541233	0.91	1	0.6	0.714286	0.5	0.28125	0.129032	0	0	0	0	0	0	0
chr1	1541246	0.878505	1	0.5	0.571429	0.5	0.114286	0.15625	0	0	0	0	0	0	0
chr1	1542011	0.913043	0.8	0.8	0	0.5	0	0	0	0	0	0	0	0	0
chr1	1542035	0.983051	1	0.6	0	0	0.4	0	0	0	0	0	0	0	0
chr1	1542062	0.981132	0.857143	0.8	0.333333	0.333333	0.461538	0	0	0	0	0	0	0	0
chr1	1542065	0.927273	0.714286	0.4	0.416667	0.428571	0.384615	0	0	0	0	0	0	0	0
chr1	1542077	0.98	0.857143	0	0.307692	0	0.307692	0	0	0	0	0	0	0	1
chr1	1542101	0.948718	0.875	0	0.1875	0	0	0	0	0	0	0	0	0	0
chr1	1546057	0.95	0	0	0.25	0	0	0	0	0	0	0	0	0	0
chr1	1549353	0.275	0	0	0	0	0	0	0	0	0	0	0	0	0
chr1	1549359	0	0	0	0	0	0	0	0	0	0	0	0	0	0
chr1	1550223	0	0	0	0	0	0	0	0	0	0	0	0	0	0
chr1	1550527	0	0	0	0	0	0	0	0	0	0	0	0	0	0
chr1	1550533	0	0	0	0	0	0	0	0	0	0	0	0	0	0
chr1	1550541	0	0	0	0	0	0	0	0	0	0	0	0	0.285714	0
chr1	1550548	0	0	0	0	0	0	0	0	0	0	0	0	0	0
chr1	1550565	0	0	0	0	0	0	0	0	0	0	0	0	0	0
chr1	1550580	0	0	0	0	0	0	0	0	0	0	0	0	0	0
chr1	1550591	0	0	0	0	0	0	0	0	0	0	0	0	0	0
chr1	1552894	0.813953	0.888889	0.444444	0	0	0	0.25	0	0	0	0	0	0	0
chr1	1552961	0.735849	1	0.333333	0.272727	0	0	0.277778	0	0	0	0	0	0	0
chr1	1553022	0.826923	0.888889	0	0	0	0	0.166667	0	0	0	0	0	0	0
chr1	1553026	0.875	1	0	0	0	0	0	0	0.214286	0	0	0	0	0
chr1	1553178	0.981132	0.6	0.333333	0.235294	0	0.25	0	0	0	0	0	0	0	0
chr1	1555988	0.971429	1	0.636364	0	0.416667	0	0	0	0	0.136364	0	0	0	0
chr1	1556004	1	1	0.5	0	0.333333	0	0	0	0	0.15	0	0	0	0
chr1	1556007	0.923077	0.857143	0	0	0.6	0.25	0	0	0	0.166667	0	0	0	1
chr1	1556016	0.902439	1	0.375	0	0.333333	0	0.130435	0	0	0.2	0	0	0	0
chr1	1556036	0.952381	1	0.375	0	0	0.333333	0.142857	0	0	0	0	0	0	0
chr1	1571740	0.980392	0.8	0.5	0.538462	0.333333	0.333333	0	0	0	0	0	0.3	0	0
chr1	1571768	0.953125	0.6	0.5	0.357143	0.214286	0.3	0	0	0	0	0	0	0	0
chr1	1571810	0.957746	0.6	0.285714	0.5625	0.5	0	0	0	0	0	0	0	0	0
chr1	1581260	0.924242	1	0.545455	0.454545	0.481481	0.777778	0.7	0.571429	0.5	0.3	0.454545	0.916667	0.875	0
chr1	1581268	0.79661	1	0.5	0.307692	0.466667	0	0.285714	0.25	0.428571	0.363636	0	0.583333	0.375	0
chr1	1581292	0.6875	1	0.411765	0.32	0.307692	0.5	0.166667	0	0	0.375	0	0.210526	0	0
chr1	1581324	0.971014	1	0.444444	0.26087	0.681818	0.625	0.576923	0.666667	0.461538	0.4375	0.333333	0.666667	0.785714	0
chr1	1581348	0.901235	1	0.466667	0.291667	0.653846	0.875	0.870968	0.875	0.8125	0.8	1	0.888889	0.941176	1
chr1	1590518	0	0	0	0	0	0	0	0	0	0	0	0	0	0
chr1	1590546	0	0	0	0	0	0	0	0	0	0	0	0.285714	0	0
chr1	1590564	0	0	0	0	0	0	0	0	0	0	0	0	0	0
chr1	1590566	0	0	0	0	0	0	0	0	0	0	0	0	0	0
chr1	1593642	0.928571	0	0	0	0	0	0	0	0	0	0	0	0	0
chr1	1597095	0.959184	1	0.444444	0.7	0.333333	0.454545	0.136364	0.5	0.2	0.444444	0.461538	0.15	0.2	1
chr1	1603013	0.931034	1	0.666667	0.5	0.352941	0	0.2	0	0	0	0	0	0	0
chr1	1603022	0.935484	1	0.571429	0.666667	0.294118	0	0.166667	0	0	0	0	0	0	1
chr1	1606390	1	1	0.75	0	0	0.25	0.25	0	0	0	0	0	0	0
chr1	1606478	1	1	0.6	0	0.333333	0.166667	0	0	0	0	0.214286	0	0.285714	0
chr1	1635301	0.952381	0.8	0	0.384615	0	0	0	0	0	0	0	0.333333	0	0
chr1	1652504	0.979592	1	0.75	0.733333	0.352941	0	0	0	0	0	0.4	0	0	0
chr1	1685220	0.955882	1	0.4	0.428571	0.25	0.272727	0	0	0	0	0	0.157895	0.333333	0
chr1	1685234	0.942857	0.777778	0.285714	0.375	0.272727	0.4	0	0	0	0	0	0.166667	0.375	0
chr1	1685250	0.924242	1	0.4	0.25	0	0	0	0	0	0	0	0	0	0
chr1	1685287	0.971429	1	0.4	0.333333	0.3125	0.230769	0	0	0	0	0	0	0	0
chr1	1691380	0.96875	1	0.666667	0.666667	0.375	0.219512	0.190476	0	0	0	0	0.222222	0	0
chr1	1694779	0.96	1	0.571429	0.666667	0.5	0	0	0	0	0	0	0	0	0
chr1	1698498	0.97561	1	0.714286	0.363636	0.818182	1	0.571429	0	0.444444	0.5625	0	0.5	0	1
chr1	1698502	0.945946	1	0.571429	0.6	0.666667	0.857143	0.571429	0.555556	0.333333	0.8	0	0.666667	0	0
chr1	1698510	0.971429	1	0.5	0.777778	0.583333	0.714286	0.666667	0.4	0.5	0.529412	0	0.8	0	1
chr1	1700723	0.947368	1	0.6	0.6	0.466667	0	0	0	0	0	0	0.15	0	0
chr1	1710654	0	0	0	0	0	0	0	0	0	0	0	0	0	0
chr1	1710663	0	0	0	0	0	0	0	0	0	0	0	0	0	0
chr1	1710721	0	0	0	0	0	0	0	0	0	0	0	0	0	0
chr1	1712645	0.928571	0	0	0	0	0	0	0	0	0	0	0	0	0
chr1	1714130	0	0	0	0	0	0	0	0	0	0	0	0	0	0
chr1	1720744	0.942029	1	0.833333	0.4375	0	0	0	0	0	0	0	0	0	0
chr1	1720853	0.942857	1	0	0.25	0.3	0	0.166667	0	0	0	0	0	0	0
chr1	1720859	0.942857	1	0.444444	0.384615	0.4	0	0	0	0	0	0	0	0	0
chr1	1727796	1	1	0.444444	0.5	0.285714	0	0	0	0	0	0	0	0	1
chr1	1728510	0.917808	0.833333	0.333333	0.454545	0.416667	0	0	0	0	0	0	0	0	0
chr1	1729371	0.941176	1	0.5	0.6	0	0	0	0	0	0	0	0	0	0
chr1	1746767	1	1	0	0.545455	0.357143	0	0	0	0	0	0	0.25	0	0
chr1	1746818	0.974359	1	0	0.6	0.230769	0	0	0	0	0	0	0	0	0
chr1	1769514	0.972222	1	1	0	0.25	0.666667	0.230769	0	0.3	0	0	0	0	0
chr1	1785557	0.97619	0.9	0.75	0.583333	0.416667	0	0	0	0	0	0	0	0	0
chr1	1793361	0.925926	0.857143	0.428571	0.444444	0.625	0.636364	0.2	0	0	0	0	0	0	0
chr1	1793365	0.960784	0.833333	0.714286	0.333333	0.5	0.333333	0	0	0	0	0	0	0	1
chr1	1793377	0.93617	0.857143	0.625	0.363636	0.375	0.272727	0	0	0	0	0	0	0	0
chr1	1793460	1	1	0.625	0.416667	0.428571	0.6	0	0	0	0.333333	0	0	0	0
chr1	1793472	0.983051	1	0.625	0.538462	0.555556	0	0	0	0	0.333333	0	0	0	0
chr1	1793484	0.933333	1	0.625	0.545455	0.5	0	0	0	0	0	0	0	0	0
chr1	1793529	0.982456	1	0.666667	0.466667	0.6	0.75	0.619048	0.8	0.615385	0.545455	0.6	0.538462	0.285714	0
chr1	1805115	0.882353	0.5	0.285714	0.4	0.4	0	0	0	0	0	0	0	0	0
chr1	1805124	0.980769	1	0.428571	0.454545	0.333333	0	0	0	0	0	0	0	0	0
chr1	1813218	0.957447	0.833333	0.555556	0.526316	0	0	0	0	0	0	0	0	0	0
chr1	1813245	0.97619	1	0.25	0.578947	0.230769	0	0	0	0	0	0	0	0	0
chr1	1824138	0.714286	0.285714	0	0.266667	0	0	0	0	0	0	0	0	0	1
chr1	1826450	0.965517	0	0	0	0	0	0	0	0	0	0	0	0.25	0
chr1	1827003	0.983607	0	0.25	0	0	0.166667	0.172414	0	0.15	0	0	0	0.142857	0
chr1	1827024	1	0	0	0	0.172414	0.190476	0	0	0	0.166667	0	0	0	0
chr1	1831154	0.960784	0	0	0	0	0	0	0	0	0	0	0	0	0
chr1	1832456	0.914894	0	0	0	0	0	0	0	0	0	0	0.15	0	0
chr1	1832477	0.95	0	0	0	0	0	0	0	0	0	0	0	0	0
chr1	1833136	0.916667	0	0	0.25	0	0	0	0	0	0	0	0	0	1
chr1	1833187	1	0	0	0	0.25	0	0	0	0	0	0	0	0	0
chr1	1842116	0.857143	0	0	0	0	0.222222	0	0	0	0	0	0	0	0
chr1	1842124	0.972222	0	0	0.333333	0.222222	0.277778	0	0	0	0	0	0	0	0
chr1	1842142	0.857143	0.5	0	0	0	0.15	0	0	0	0.176471	0	0	0	0
chr1	1842273	0.976744	0	0	0	0	0.142857	0.146341	0	0	0	0	0	0	0
chr1	1843249	0.95	0	0.6	0	0	0	0	0	0	0	0	0	0	0
chr1	1845230	0.955556	0	0	0	0	0	0	0	0	0	0	0	0	0
chr1	1845337	0.888889	0	0	0	0	0.15	0	0	0	0	0	0	0	1
chr1	1845567	0.954545	0	0	0	0	0	0	0	0	0	0	0	0	0
chr1	1847893	0.979592	0.4	0	0	0	0	0	0	0	0	0	0	0	0
chr1	1848398	1	0.8	0	0.266667	0.357143	0	0.108108	0	0	0	0	0	0.25	1
chr1	1848503	0.933333	0	0	0	0	0	0	0	0	0	0	0	0	0
chr1	1848855	1	1	0.333333	0	0.230769	0	0	0	0	0	0	0	0	0
chr1	1851327	0	0	0	0	0	0	0	0	0	0	0	0	0	0
chr1	1851372	0	0	0	0	0	0	0	0	0	0	0	0	0	0
chr1	1851384	0	0	0	0	0	0	0	0	0	0	0	0	0	0
chr1	1851483	0	0	0	0	0	0	0	0	0	0	0	0.15	0	0
chr1	1851542	0.105263	0	0	0	0	0	0	0	0	0	0	0	0	0
chr1	1854192	0.961538	1	0	0	0	0.2	0	0	0	0	0	0	0	1
chr1	1856608	0.95122	0.5	0.454545	0.6	0.375	0	0	0	0	0	0	0	0	0
chr1	1856646	1	0.666667	0.545455	0.333333	0.4	0.275	0	0	0	0	0	0.148148	0	0
chr1	1856666	1	0.333333	0	0.6	0	0.288889	0	0	0	0	0	0	0	0
chr1	1856700	0	0	0	0	0	0	0	0	0	0	0	0	0	0
chr1	1856702	0.96748	0.8	0.555556	0.428571	0.333333	0.384615	0.290323	0.375	0.346154	0.142857	0.25	0.153846	0.2	0
chr1	1856710	0.983471	0.4	0.666667	0	0.333333	0.122449	0.121212	0	0	0	0	0	0	0
chr1	1858949	0.901639	0.333333	0	0	0	0	0	0	0	0	0	0	0	0
chr1	1859061	1	0.75	0.333333	0.3	0.25	0	0.272727	0	0	0	0	0	0	0
chr1	1859067	1	0.666667	0.285714	0	0.25	0	0.25	0	0	0	0	0	0	0
chr1	1859080	0.928571	0.5	0	0.3	0	0	0	0	0	0.428571	0	0	0.5	0
chr1	1859309	0.979167	0.4	0.25	0.25	0.333333	0	0	0	0	0	0	0.157895	0	1
chr1	1859318	0.98	0	0.25	0.444444	0	0	0	0	0	0	0	0.176471	0	0
chr1	1859322	1	0.4	0.375	0.333333	0.5	0	0	0	0	0	0	0.151515	0	1
chr1	1859325	0.980769	0.8	0.375	0	0	0	0	0	0	0	0	0.121212	0	1
chr1	1859329	0.944444	0.333333	0.285714	0	0.4	0	0	0	0	0	0	0	0	0
chr1	1859418	0.982143	0.25	0.25	0.4	0	0.166667	0	0	0	0	0	0	0	1
chr1	1859425	0.964912	0.375	0.428571	0	0	0.157895	0	0	0	0	0	0	0	0
chr1	1861684	0.954545	0.545455	0	0	0.266667	0	0	0	0	0	0	0	0	0
chr1	1861694	0.933333	0	0	0	0.230769	0.181818	0	0	0	0	0	0	0	0
chr1	1861699	0.988636	0	0	0	0.266667	0.15	0	0	0	0.1875	0	0	0	0
chr1	1861744	0.953488	0.4375	0	0	0.333333	0	0.263158	0	0	0	0	0	0	0
chr1	1861755	0.955056	0	0	0	0	0	0.25	0	0	0	0	0	0	0
chr1	1861935	0.984127	0.666667	0.285714	0.444444	0	0	0	0	0	0	0	0	0	0
chr1	1861946	0.895522	0.666667	0	0	0.214286	0.272727	0	0	0	0	0	0	0	0
chr1	1861991	0.957447	0	0.5	0	0	0	0	0	0	0	0	0	0	0
chr1	1866003	0.0555556	0	0	0.333333	0.3125	0	0.222222	0	0.178571	0	0	0.478261	0.421053	0
chr1	1866035	0.353383	0.875	0.4	0	0.333333	0.297872	0.152174	0	0.27027	0.137931	0	0	0.142857	0
chr1	1866071	0.306452	0.75	0.4	0.307692	0.307692	0.216216	0.159091	0	0.238095	0	0.15	0.117647	0	0
chr1	1866079	0.59322	0.875	0.666667	0.428571	0.538462	0.444444	0.268293	0.3	0.428571	0.208333	0.15	0.147059	0.190476	0
chr1	1866113	0.645161	1	0.428571	0.333333	0.5	0.428571	0.222222	0	0.282051	0	0.272727	0.2	0.190476	0
chr1	1866147	0.555556	1	0.8	0.333333	0.4375	0.307692	0.28125	0	0.21875	0.347826	0.307692	0.166667	0.217391	0
chr1	1867076	0.444444	1	0	0.4	0.4	0.227273	0.136364	0	0	0	0	0.222222	0	0
chr1	1868481	0.671429	0.888889	0.6	0.555556	0.619048	0	0.166667	0	0	0	0	0.142857	0	0
chr1	1868484	0.887324	1	0.6	0.6	0.75	0.2	0.222222	0	0	0	0	0	0	0
chr1	1868542	0.430556	0.9	0	0.461538	0	0	0	0	0	0	0	0	0	0
chr1	1868596	0.714286	0.8	0.333333	0.4	0.384615	0	0	0	0	0	0	0	0	0
chr1	1868604	0.77027	0.7	0	0.454545	0.5	0	0	0	0	0	0	0.157895	0	1
chr1	1868613	0.61039	0.777778	0.428571	0.454545	0.6	0	0	0	0	0	0	0	0	1
chr1	1868638	0.897436	0.875	0.444444	0.727273	0.307692	0	0	0	0	0	0	0	0	0
chr1	1868653	0.613333	0.857143	0.375	0.454545	0.642857	0	0	0	0	0	0	0	0	0
chr1	1868656	0.828571	1	0.375	0.5	0.461538	0	0	0	0	0	0	0	0	0
chr1	1868661	0.732394	1	0.428571	0.555556	0.5	0	0	0	0	0	0	0	0	0
chr1	1868667	0.75	1	0.5	0.363636	0.466667	0	0	0	0	0	0	0	0	0
chr1	1868687	0.835821	1	0.5	0.384615	0.5	0	0	0	0	0	0	0	0	0
chr1	1868795	0.530303	0.666667	0.333333	0.285714	0.307692	0.333333	0.416667	0	0	0	0	0	0	1
chr1	1868823	0.709091	0.8	0.285714	0.333333	0.357143	0	0	0	0	0	0	0	0	1
chr1	1875145	0	0	0	0	0	0	0	0	0	0	0	0	0	0
chr1	1875154	0.957447	1	0	0.214286	0.230769	0	0.235294	0	0	0	0	0	0	1
chr1	1875230	0.945455	1	0	0	0.272727	0	0	0	0	0	0	0	0	1
chr1	1876789	0.967213	0.6	0.333333	0.285714	0.235294	0	0.25	0	0	0	0	0	0	0
chr1	1876817	0.964286	0.6	0.4	0.375	0.307692	0.142857	0.166667	0	0	0	0.25	0	0	0
chr1	1876823	0.962264	1	0.545455	0.571429	0.428571	0.2	0.166667	0	0	0	0	0	0	1
chr1	1877735	0.9375	1	0.4	1	0.357143	0.185185	0	0	0	0	0	0	0	0
chr1	1877756	0.985075	0	0	0.714286	0.333333	0	0.148148	0	0	0	0	0	0	0
chr1	1889976	0.964286	1	0.75	0.538462	0.636364	0.25	0.217391	0	0	0.333333	0	0	0.272727	1
chr1	1892221	0.978723	0.5	0.333333	0.4	0.333333	0	0	0	0	0	0	0	0	0
chr1	1892516	1	1	0.6	0.454545	0.1875	0	0	0	0	0	0	0	0	0
chr1	1892552	0.97619	1	0.6	0.333333	0.214286	0	0	0	0	0	0	0.230769	0	1
chr1	1895458	0.95122	0.8	0.545455	0.3	0	0	0	0	0	0	0	0	0	0
chr1	1898564	0.955556	1	0.7	0.285714	0.444444	0.833333	0.529412	0.5	0.642857	0.857143	0.375	0.6	0	0
chr1	1898566	0.976744	1	0.75	0.285714	0.333333	0.416667	0.352941	0.333333	0.357143	0.571429	0	0	0	0
chr1	1898573	1	1	0.777778	0.333333	0.375	0.857143	0.555556	0.333333	0.466667	0.8	0	0	0.285714	0
chr1	1898607	0.95122	1	0.666667	0	0	0.352941	0	0	0	0.285714	0	0	0	0
chr1	1898937	0.714286	0.4	0.5	0.4	0.4	0.272727	0	0	0	0.142857	0	0	0	0
chr1	1898946	0.923077	1	0.8	0.5	0.272727	0.363636	0.1875	0	0	0.190476	0	0	0	0
chr1	1899601	0.956522	0.666667	0.333333	0.615385	0.1875	0.153846	0	0	0	0	0	0.138889	0	0
chr1	1900062	0.909091	1	0.5	0	0.214286	0	0	0	0	0	0	0	0	0
chr1	1900083	0.880952	0.8	0.333333	0	0	0	0	0	0	0	0	0	0	0
chr1	1901372	0.940299	0.666667	0	0	0	0	0	0	0.148148	0	0	0	0	1
chr1	1901400	0.96875	0.5	0	0	0	0	0	0	0	0	0	0	0	0
chr1	1903303	0.35	0.6	0.333333	0.666667	0.5	0.642857	0	0	0.2	0	0.25	0.5	0.333333	0
chr1	1903332	0.96	0.833333	0.666667	0.375	0.461538	0.388889	0.210526	0	0	0.428571	0	0.230769	0	1
chr1	1904657	0.98	1	0.375	0.363636	0.571429	0.2	0	0	0	0	0	0	0	1
chr1	1905067	0.921348	0.6	0.5	0.214286	0.555556	0	0	0	0	0	0	0	0	0
chr1	1905160	0.936508	1	0.375	0	0.444444	0.170732	0	0	0	0	0	0	0	0
chr1	1905193	0.938462	1	0.428571	0	0.444444	0	0	0	0	0	0	0.185185	0	1
chr1	1905217	0.965517	0.833333	0.25	0.307692	0.454545	0	0	0	0	0	0	0.142857	0	0
chr1	1905922	0.947368	0.9	0.571429	0.5	0.230769	0.428571	0	0	0	0.1875	0	0	0	0
chr1	1905979	0.946429	1	0.571429	0.272727	0	0	0.222222	0	0	0.2	0	0.235294	0	0
chr1	1906165	0.981132	1	0.666667	0.4	0	0	0.142857	0	0	0.142857	0	0.125	0	1
chr1	1906180	0.964912	0.833333	0.666667	0.666667	0.333333	0	0.185185	0	0	0.121212	0	0.15625	0	0
chr1	1906243	0.981818	1	0.7	0	0.428571	0.346154	0.178571	0	0	0.185185	0.25	0	0.25	0
chr1	1906268	0.943396	1	0.714286	0.4	0.615385	0.148148	0.242424	0.25	0.25	0.222222	0.2	0.15	0	0
chr1	1909072	0.942308	1	0.6	0.4	0.375	0	0	0	0	0	0	0	0	1
chr1	1909092	0.980392	1	0.5	0	0.411765	0	0	0	0	0	0	0.25	0	0
chr1	1909150	0.952381	1	0	0.285714	0.333333	0	0	0	0	0	0	0	0	0
chr1	1909969	1	1	0.285714	0.3	0.666667	0.408163	0	0.136364	0	0	0	0	0.206897	0
chr1	1910353	0.982456	1	0.714286	0.615385	0.333333	0.25641	0.157895	0	0	0	0	0.190476	0	0
chr1	1910373	0.950413	1	0.5	0.666667	0.6	0.207547	0.269231	0	0	0	0	0	0	0
chr1	1910390	0.985612	1	0.571429	0.545455	0.571429	0.192308	0.178571	0	0	0	0.142857	0.129032	0	0
chr1	1910397	0.963768	1	1	0.666667	0.857143	0.529412	0.2	0.333333	0.133333	0.2	0.333333	0.275862	0	0
chr1	1910411	0.985507	1	0.833333	0.777778	0.714286	0.333333	0	0	0	0.25	0	0.172414	0	0
chr1	1910421	0.847222	1	0.833333	0.8	0.777778	0.254902	0	0	0	0	0.214286	0.178571	0	0
chr1	1910426	0.722222	0.5	0.833333	0.666667	0.666667	0.0909091	0	0	0	0	0	0.121212	0	0
chr1	1910431	0.959184	1	0.6	0.818182	0.777778	0.224138	0	0	0	0	0	0.16129	0	0
chr1	1910455	0.759124	1	0.4	0.75	0.875	0.527273	0	0	0	0.272727	0	0.16	0.307692	0
chr1	1910469	0.992593	1	0.666667	0.727273	0.888889	0.448276	0.157895	0.307692	0	0	0	0.157895	0.181818	1
chr1	1910479	0.903226	1	0.714286	0.8	0.555556	0.265625	0.272727	0	0	0	0	0.0952381	0.173913	0
chr1	1910489	0.939655	1	0.666667	0.75	0.444444	0.136986	0.24	0	0	0	0	0	0.142857	0
chr1	1910508	0.90566	1	0.833333	0.75	0.285714	0.266667	0.391304	0	0.105263	0	0	0.181818	0	0
chr1	1910527	0.979592	1	0.857143	0.7	0.5	0.442857	0.3125	0.230769	0	0	0	0	0	0
chr1	1910542	0.911111	1	0.666667	0.818182	0.4	0.355263	0.235294	0.166667	0	0	0.153846	0.162791	0	0
chr1	1910885	0.991071	1	0.8	1	0.9	0.324324	0	0	0	0	0.148148	0	0	0
chr1	1912012	0.90566	1	0.714286	0.909091	0.5625	0	0	0	0	0	0	0	0	0
chr1	1912515	0.935484	1	0.7	0.8	0.75	0.3125	0.3125	0	0.1875	0	0	0	0	0
chr1	1913752	0.975904	0.833333	0.714286	0.875	0.875	0	0	0	0	0	0	0	0	0
chr1	1913762	0.921348	0.833333	0.857143	0.5	0.7	0	0.25	0	0	0	0	0	0	0
chr1	1913764	0.932584	1	0.857143	0.666667	0.9	0	0.25	0	0	0	0	0	0	0
chr1	1913772	0.908046	1	1	0.714286	0.9	0.266667	0	0	0	0.25	0	0	0	0
chr1	1913787	0.911111	0.75	0.857143	0.714286	0.888889	0.3125	0	0	0	0	0	0	0	1
chr1	1913797	0.911111	1	0.888889	0.5	0.5	0.1875	0	0	0	0	0	0	0	0
chr1	1913799	0.94382	1	0.875	0.625	0.777778	0.294118	0	0	0	0	0	0	0	0
chr1	1913924	0.955882	0.833333	1	0.75	0.692308	0.25	0.263158	0	0	0	0	0	0	0
chr1	1914575	0.938776	1	1	0.555556	0.692308	0	0	0	0	0	0	0	0	0
chr1	1914586	0.953488	1	0.666667	0.714286	0.769231	0.333333	0	0	0	0	0	0	0	0
chr1	1914597	0.883721	0.4	0.666667	0.777778	0.769231	0	0	0	0	0	0	0	0	1
chr1	1916018	0.957143	1	0.333333	0	0.5	0	0	0	0	0	0	0	0.375	0
chr1	1916034	0.638889	0.8	0.363636	0.428571	0.6	0.241379	0	0	0	0	0	0	0.428571	0
chr1	1916038	0.985714	1	0.636364	0.428571	0.7	0.310345	0	0	0	0	0	0	0.444444	0
chr1	1918644	0.891304	0.5	0	0.285714	0	0	0	0	0	0	0	0	0	0
chr1	1920851	0.916667	0	0	0	0	0	0	0	0	0	0	0	0	0
chr1	1920855	1	0	0	0	0	0.3	0	0	0	0	0	0	0	0
chr1	1920900	0.929825	0	0	0.230769	0	0	0	0	0	0	0	0	0	0
chr1	1926612	0.978261	0	0	0	0	0	0.266667	0	0	0	0	0	0	0
chr1	1929836	0.966667	0.9	0.375	0.5	0.666667	0	0	0	0	0	0	0	0	0
chr1	1930763	0.965517	1	0.4	0.5	0.3	0	0	0	0	0	0	0	0	0
chr1	1933170	0.963636	1	0.25	0.375	0.545455	0.333333	0.1875	0	0	0	0	0	0	0
chr1	1936813	0.927273	0	0	0	0	0.375	0	0	0	0	0	0	0	0
chr1	1940837	0.888889	0	0	0	0	0	0	0	0	0	0	0.285714	0	0
chr1	1940852	0.833333	0	0	0	0	0	0	0	0	0	0	0.285714	0	0
chr1	1940892	0.944444	0.333333	0	0	0.25	0	0	0	0	0	0	0	0.333333	0
chr1	1941573	0.968254	0.4	0.428571	0	0	0	0.173913	0	0	0	0	0	0	0
chr1	1941585	0.984615	0.25	0.285714	0	0	0	0	0	0	0	0	0	0	1
chr1	1946939	0.962963	0	0	0	0	0	0	0	0	0	0	0	0	0
chr1	1946949	0.981132	0	0	0	0	0	0	0	0	0	0	0	0	0
chr1	1946972	0.977778	0	0	0.25	0	0.176471	0	0	0	0	0	0	0	0
chr1	1947095	0.958333	0	0	0	0	0	0	0	0	0	0	0	0	0
chr1	1947161	0.912281	0	0	0	0	0	0	0	0	0	0	0	0	0
chr1	1947197	0.918367	0	0	0	0	0	0	0	0	0	0	0	0	0
chr1	1951322	0	0	0	0	0	0	0	0	0	0	0	0	0	0
chr1	1953038	0.912281	0.5	0	0	0.375	0	0	0	0	0	0	0	0	0
chr1	1954339	0.923077	0	0	0	0	0	0.2	0	0	0	0	0	0	0
chr1	1954435	0.131579	0	0	0	0	0	0	0	0	0	0	0	0	0
chr1	1954458	0.959184	0.25	0	0	0	0	0.210526	0	0	0	0	0.222222	0	0
chr1	1954482	0.918367	0	0	0	0	0	0	0	0	0	0	0.3125	0	0
chr1	1954587	0.959184	0.25	0	0	0	0	0	0	0	0	0	0.230769	0	0
chr1	1955124	0.971831	0	0.5	0	0	0	0	0	0	0	0	0	0	1
chr1	1956993	0.985075	0	0	0	0	0	0	0	0	0	0	0	0	0
chr1	1958843	0.875	0	0	0	0	0	0	0	0	0	0	0	0	1
chr1	1958964	0.960784	0.363636	0	0	0	0	0	0	0	0	0	0	0	0
chr1	1959037	0.984127	0.375	0	0	0	0.5625	0	0	0.294118	0	0.230769	0	0.388889	0
chr1	1960999	1	0	0	0.375	0	0.285714	0.148148	0	0	0	0	0	0	0
chr1	1961008	0.974684	0	0	0.428571	0	0.285714	0.230769	0	0	0	0	0	0	0
chr1	1961017	0.987179	0.666667	0	0.375	0	0.347826	0	0	0	0	0	0	0	0
chr1	1961049	0.974026	0	0.333333	0.25	0	0.15	0	0	0	0	0	0	0	0
chr1	1961075	0.883117	0	0	0	0	0	0	0	0	0	0	0	0	1
chr1	1961102	0.9	0	0	0	0	0.192308	0	0	0	0	0	0	0	1
chr1	1961111	0.970149	0	0	0	0	0.315789	0	0	0	0	0	0	0	0
chr1	1961144	0.982456	0	0	0	0	0.375	0.25	0	0	0	0	0	0	0
chr1	1961147	0.946429	0	0.363636	0	0	0	0	0	0	0	0	0	0	0
chr1	1962071	0.95122	0	0	0	0	0	0	0	0	0	0	0	0	0
chr1	1962407	0.90566	0	0	0	0	0	0	0	0	0	0	0	0	0
chr1	1962517	1	0	0	0	0	0	0.136364	0	0	0	0	0	0.4	0
chr1	1967148	0.961538	0	0	0	0	0	0	0	0	0	0	0.230769	0.333333	0
chr1	1968956	0.969697	0.4	0	0	0	0.5	0.285714	0.333333	0.333333	0	0.4	0	0	0
chr1	1968958	0.140625	0.6	0	0	0	0	0	0	0.615385	0	0.230769	0	0	0
chr1	1968983	0.983333	0	0	0	0	0	0	0	0.157895	0	0	0	0.25	1
chr1	1969261	0.9375	0	0	0	0	0.25	0	0	0	0	0	0	0	0
chr1	1972874	0.894737	0	0	0	0	0	0	0	0	0	0	0	0	0
chr1	1972959	0.960784	0.444444	0	0.272727	0.214286	0.25	0	0	0	0	0	0	0	1
chr1	1973533	0.934426	0	0	0.25	0.25	0.114286	0	0	0	0	0	0	0	1
chr1	1973567	0.983471	0	0	0	0	0.105263	0.15625	0	0	0	0	0	0	0
chr1	1973632	0.960396	0.333333	0	0	0	0.181818	0.16129	0	0	0.173913	0	0.277778	0	0
chr1	1980166	0.955556	0	0	0	0	0	0	0	0	0	0.222222	0.129032	0	0
chr1	1980222	0.942308	0	0	0	0	0.166667	0	0	0	0	0	0	0	0
chr1	1980342	0.909091	0.4	0	0	0	0	0	0	0	0	0	0	0	0
chr1	1985090	0.933333	1	0.333333	0.25	0.5	0.210526	0	0	0	0	0	0	0	0
chr1	1986847	0.976744	1	0.285714	0.4	0	0	0.235294	0	0	0	0	0	0	0
chr1	1986919	1	1	0.4	0.4	0.363636	0.294118	0	0	0	0	0	0	0	1
chr1	1989638	0.974359	1	0.4	0.6	0.5	0	0.25	0	0	0	0	0	0.285714	0
chr1	1990864	0.928571	1	0.8	0.533333	0.705882	0	0	0	0	0	0	0	0	0
chr1	1990875	0.979592	1	0.8	0.533333	0.8	0.555556	0	0.4	0.3	0.4	0.25	0	0.333333	1
chr1	1991205	0.968254	1	0	0.4	0	0.272727	0	0	0	0	0	0	0	0
chr1	1991521	0.954545	1	0.8	0.875	0.444444	0	0	0	0	0	0	0	0	0
chr1	1991552	0.987342	1	0.6	0.888889	0.625	0.333333	0.142857	0	0	0	0.25	0	0.375	0
chr1	1991561	0.97561	1	0.6	0.875	0.5	0	0.15	0	0	0	0	0	0	0
chr1	1991566	0.950617	1	0.6	0.777778	0.6	0.285714	0	0	0	0	0	0	0	1
chr1	1993016	0.968254	1	0.8	0	0.363636	0.428571	0	0	0	0	0	0	0	1
chr1	1993022	0.967742	1	0.8	0.545455	0.4	0.3	0	0	0	0	0	0	0	0
chr1	1993053	0.942308	1	0.4	0.5	0.444444	0.25	0	0.285714	0.176471	0	0.230769	0	0	0
chr1	1993095	0.925373	1	0.4	0.4	0.444444	0	0	0	0.214286	0	0	0	0	0
chr1	1993146	0.957746	1	0.333333	0	0.466667	0	0	0	0	0	0	0	0	0
chr1	1993150	0.957746	1	0.666667	0.230769	0.4	0	0	0	0	0	0	0	0	0
chr1	1993169	0.9375	1	0.666667	0.5	0.533333	0.2	0	0	0	0	0	0	0	0
chr1	1998716	0.571429	0.875	0.3	0.4375	0	0.25	0.2	0	0	0.388889	0.454545	0.642857	0	0
chr1	1998752	0.968254	0.9	0.5	0.461538	0.428571	0.26087	0	0	0	0.136364	0.3	0.190476	0	0
chr1	1998809	0.978261	1	0.666667	0.285714	0.555556	0.478261	0	0.25	0	0.35	0.333333	0.363636	0.375	1
chr1	1998863	0.959184	1	0.444444	0.636364	0.722222	0.166667	0	0	0	0	0	0	0	0
chr1	1998867	0.959184	0.4	0.4	0.818182	0.555556	0.565217	0.222222	0	0.3	0	0	0.333333	0	0
chr1	1998877	0.98	0.8	0.375	0.555556	0.611111	0.363636	0	0	0	0.285714	0	0.130435	0	0
chr1	1998896	0.94	1	0.375	0.769231	0.3125	0.285714	0	0.285714	0.222222	0	0	0	0	0
chr1	2001883	0.963636	0.8	0.5	0.454545	0.428571	0	0	0	0	0	0	0	0	0
chr1	2003577	0.894737	0.333333	0	0	0.157895	0	0.176471	0	0	0	0	0	0	0
chr1	2003605	0.947368	0	0.428571	0	0	0	0.285714	0	0	0	0	0	0	0
chr1	2003612	0.971429	0.5	0.25	0	0	0	0	0	0	0	0	0	0	0
chr1	2003643	0.971429	0	0	0	0.181818	0	0	0	0	0	0	0	0	0
chr1	2003698	1	0.333333	0.428571	0	0	0	0	0	0	0	0	0	0	1
chr1	2003710	0.97619	0	0	0	0	0	0	0	0	0	0	0	0	1
chr1	2003811	0.939394	0	0	0	0	0	0	0	0	0	0	0	0	0
chr1	2003823	0.827586	0	0	0	0	0	0	0	0	0	0	0	0	0
chr1	2004116	0.977778	0.333333	0	0	0	0	0	0	0	0	0	0	0	0
chr1	2004151	1	0	0	0	0	0	0	0	0	0	0	0	0	0
chr1	2004163	0.93617	0	0	0	0	0	0	0	0	0	0	0	0.153846	0
chr1	2004169	0.955556	0.5	0.285714	0	0	0	0	0	0.136364	0	0	0	0	0
chr1	2005486	0.925373	0	0	0	0.285714	0	0	0	0	0	0	0	0	0
chr1	2005703	0.984615	0	0	0.333333	0	0	0	0	0	0	0	0	0	0
chr1	2005745	0.983871	0.4	0	0	0.2	0.214286	0	0	0	0	0	0	0	0
chr1	2005769	0.916667	0	0	0	0	0.235294	0	0	0.176471	0	0	0	0	0
chr1	2005787	1	0	0	0	0	0	0	0	0	0	0	0	0	0
chr1	2005798	0.962264	0	0	0	0	0	0.129032	0	0.133333	0	0	0	0	0
chr1	2005852	1	0	0	0	0	0	0.179487	0	0	0	0	0	0	0
chr1	2005885	0.923077	0	0	0	0.4	0.136364	0.16129	0	0	0	0	0	0	0
chr1	2005896	0.928571	0.285714	0.333333	0	0.25	0	0.121212	0	0	0	0	0	0	0
chr1	2005904	0.963636	0.428571	0.333333	0	0.3	0	0	0	0.16	0	0	0	0	0
chr1	2005909	0.931034	0.285714	0.333333	0	0	0.148148	0.129032	0	0	0	0	0	0	0
chr1	2006951	0.985507	0.8	0.555556	0.5	0	0.266667	0.277778	0	0	0	0	0	0	0
chr1	2007116	0.983607	0.833333	0.4	0.3	0.5	0	0	0	0	0.25	0	0	0	0
chr1	2007310	0.92	1	0.428571	0	0.294118	0	0.2	0	0	0	0	0	0	1
chr1	2007333	0.959184	1	0	0.5	0.235294	0.411765	0.142857	0	0	0	0	0	0	0
chr1	2007349	0.981481	0.4	0.25	0	0.2	0	0	0	0	0	0	0	0	0
chr1	2008602	0.911111	0.4	0.8	0.8	0.555556	0	0	0	0	0	0	0	0	0
chr1	2008607	1	0.4	0.8	1	1	0.285714	0	0	0	0.214286	0	0.157895	0	0
chr1	2008613	1	1	1	0.933333	1	0.583333	0.272727	0	0	0	0	0	0	0
chr1	2008624	0.977273	1	0.833333	0.8125	1	0.571429	0.25	0.375	0	0.285714	0	0	0	0
chr1	2008646	1	1	1	0.875	0.857143	0.642857	0.25	0.285714	0	0	0	0	0	0
chr1	2008648	1	1	0.8	0.875	1	0.769231	0.466667	0.857143	0	0.428571	0	0.357143	0.5	0
chr1	2010066	0.97561	1	0.666667	0.8	0.615385	0.833333	0.461538	0.8	0.666667	0.857143	0.6	0.538462	1	0
chr1	2010426	0.914286	1	1	0.9	0.625	0.818182	0.777778	0.833333	0.888889	0.875	0.6	0.894737	0.833333	0
chr1	2010430	0.918919	1	0.857143	0.8	0.875	0.888889	0.5	1	1	0.857143	0.6	0.9375	0.833333	0
chr1	2010438	1	1	1	0.8	0.777778	0.888889	0.666667	1	0.75	0.833333	0.833333	0.875	0.833333	1
chr1	2010721	0.978723	1	0.777778	0.777778	0.857143	0.8	0.95	0.875	0.941176	1	0.857143	0.947368	0.888889	1
chr1	2010733	0.122449	0	0	0	0	0	0	0.25	0.235294	0	0	0.238095	0	0
chr1	2011131	0.962264	1	1	1	0.684211	0.529412	0.6	0.7	0.5	0.8	0	0.555556	0.333333	1
chr1	2011225	0.955556	1	1	0.8	0.846154	0.818182	0.75	0.7	0	0.833333	0.625	0.615385	0.833333	1
chr1	2011974	0.944444	1	0.4	0.625	0.615385	0	0	0	0	0	0	0	0	0
chr1	2012544	0.942029	1	0.625	0.375	0.533333	0.333333	0.4	0	0.285714	0	0	0	0	0
chr1	2012578	0.968254	1	0.6	0.428571	0.692308	0.142857	0	0	0	0	0	0	0	0
chr1	2013036	1	0.888889	0.6	0.555556	0.5	0.3	0.222222	0	0.16	0.176471	0	0.526316	0	0
chr1	2013722	0.981818	1	0.6	0.428571	0.466667	0.2	0	0	0	0	0	0	0	0
chr1	2013800	1	1	0.4	0.9	0.538462	0.25	0	0	0	0	0.176471	0	0	0
chr1	2013807	0.982759	1	0.4	0.8	0.428571	0.259259	0	0	0	0	0.166667	0	0	0
chr1	2013915	0.931818	1	0.571429	0.666667	0.444444	0.153846	0.157895	0	0	0	0	0	0	0
chr1	2013919	0.977273	1	0.857143	0.666667	0.6875	0.48	0.388889	0	0	0.1875	0	0	0	0
chr1	2013921	0.914894	1	0.714286	0.833333	0.588235	0.36	0.176471	0	0	0	0	0	0	0
chr1	2015527	0.952381	1	0.8	0.714286	0.5	0	0	0	0	0	0	0	0	0
chr1	2016566	1	1	0.8	0.714286	0	0	0	0	0	0	0	0	0	1
chr1	2016677	0.962963	0.571429	0.333333	0.625	0	0.294118	0.333333	0	0	0	0.214286	0	0	0
chr1	2019064	0.96875	1	0.375	0.285714	0.538462	0	0	0	0	0	0	0	0	1
chr1	2019087	0.97561	0.666667	0.444444	0	0.214286	0	0	0	0	0	0	0	0	0
chr1	2019102	0.974359	0.833333	0.4	0	0.230769	0.384615	0.266667	0	0	0	0.285714	0.25	0.25	1
chr1	2019214	0.97561	1	0	0.285714	0	0	0	0	0	0	0	0	0	0
chr1	2021732	0.981818	1	0.8	0.444444	0.285714	0	0	0	0	0	0	0	0	0
chr1	2024389	0.957447	1	0.5	0.666667	0.416667	0	0	0	0	0	0	0	0	0
chr1	2024439	0.980392	0.833333	0.333333	0.7	0.25	0	0	0	0	0	0	0	0	0
chr1	2024593	0.9375	1	0.444444	0.3	0.285714	0	0	0	0	0	0	0	0	0
chr1	2026095	0.962264	0.833333	1	0.888889	0.714286	0	0	0	0	0	0	0	0	0
chr1	2026109	0.944444	1	1	0.666667	0.75	0.6	0	0	0	0	0	0	0.4	0
chr1	2026116	0.945455	1	1	0.727273	0.75	0.333333	0	0	0	0	0	0	0	0
chr1	2026126	0.981481	1	1	0.727273	0.625	0	0.285714	0	0	0	0	0	0	0
chr1	2026130	0.962264	1	1	0.818182	0.666667	0.714286	0	0	0.375	0	0	0	0.333333	0
chr1	2026139	0.966102	1	1	0.818182	0.666667	0.5	0.285714	0	0	0	0	0	0	0
chr1	2026144	0.967213	0.857143	0	0.909091	0.444444	0.428571	0.285714	0	0	0	0	0	0	0
chr1	2028683	1	1	0.666667	0.666667	0.75	0.777778	0.611111	0.625	0.5625	0.769231	0	0.909091	0.5	0
chr1	2028687	0.973684	1	0.8	0.5	0.875	0.888889	0.789474	1	1	1	1	0.878788	0.666667	0
chr1	2029789	0.962963	1	1	0.875	0.75	0.8	0.882353	0.857143	0.857143	0.933333	0.833333	1	1	1
chr1	2030483	0.966667	1	1	0.8	0.4375	0.473684	0.333333	0.285714	0	0	0	0.388889	0	0
chr1	2030507	0.982456	1	0.8	0.764706	0.5	0.4	0.333333	0	0	0	0	0.157895	0	0
chr1	2030566	0.903846	1	0.6	0.5	0	0.25	0.333333	0	0	0	0	0	0	0
chr1	2033266	0.968421	1	0.6	0.8	0.75	0.217391	0	0	0	0.176471	0	0	0	0
chr1	2034465	0.979592	1	0.5	0.75	0.636364	0.333333	0.363636	0.4	0	0	0.3	0.363636	0	1
chr1	2034722	0.973684	1	0.6	0.7	0.470588	0	0	0	0	0	0	0	0	0
chr1	2035689	0.911765	1	0	0.555556	0	0	0	0	0	0	0	0	0	0
chr1	2036732	0.979167	0.833333	0	0.545455	0.1875	0	0	0	0	0	0	0	0	1
chr1	2036780	0.895522	0.8	0.375	0.333333	0.5	0.363636	0	0	0	0	0	0.157895	0	0
chr1	2036791	0.952381	0.8	0.625	0.466667	0.5	0	0	0	0	0	0	0	0	0
chr1	2036833	0.933333	0.833333	0.4	0.357143	0.333333	0	0	0	0	0	0	0	0	0
chr1	2040214	0.9375	1	0.833333	0.875	0.307692	0	0	0	0	0	0	0	0	0
chr1	2040218	0.952381	1	0.666667	0.625	0.357143	0	0	0	0	0	0	0	0	0
chr1	2040258	0.8	1	0.4	0.6	0	0	0	0	0	0	0	0	0	0
chr1	2042999	0.9375	1	0.4	0	0	0	0	0	0	0	0	0.235294	0	0
chr1	2044871	0.921053	1	0.5	0.857143	0.375	0	0	0	0	0	0	0	0	0
chr1	2044877	0.894737	0.428571	0.555556	0.833333	0.285714	0	0.16	0	0	0	0	0	0	0
chr1	2052755	0.97619	1	0.666667	0.75	0.727273	0.64	0.454545	0.75	0.157895	0.3	0	0.444444	0.217391	0
chr1	2052764	1	1	0.5	0.714286	0.833333	0.291667	0.333333	0	0	0.190476	0	0.157895	0	0
chr1	2052774	1	1	1	0.857143	0.75	0.652174	0.65	0.3	0.352941	0.363636	0	0.388889	0	0
chr1	2055935	0.971429	1	0.5	0.714286	0.571429	0.25	0	0	0.130435	0	0	0	0	1
chr1	2055980	0.97619	1	0.714286	0.428571	0.454545	0	0	0	0	0	0	0	0	0
chr1	2056017	0.924528	1	0.555556	0.454545	0.416667	0	0	0	0	0	0	0	0	0
chr1	2056037	0.962963	1	0.333333	0.5	0	0	0	0	0	0	0	0	0	0
chr1	2056574	0.972222	0.833333	0	0.5	0.2	0	0	0	0.285714	0	0	0	0	0
chr1	2057038	0.958333	1	0.6	0.4	0.7	0	0	0	0	0	0	0	0	1
chr1	2057098	0.942308	1	0.5	0.5	0.333333	0.375	0	0	0	0	0	0	0	0
chr1	2057109	0.964286	1	0.428571	0.444444	0.333333	0	0.25	0	0	0	0	0	0	0
chr1	2059352	0.931034	1	0.5	0.375	0.272727	0	0	0	0	0	0	0	0	0
chr1	2059360	1	1	0.5	0.352941	0.47619	0	0	0	0	0	0	0	0.3	1
chr1	2060670	0.939394	1	0.428571	0.4	0.5	0	0	0	0	0	0	0.290323	0	0
chr1	2063906	0	0.8	0.5	0.333333	0.4	0	0	0	0	0	0	0	0	0
chr1	2068326	0.907407	1	0	0.375	0	0	0	0	0	0	0	0	0	0
chr1	2069453	1	0.9	0.4	0.666667	0.416667	0	0	0	0	0	0	0	0	0
chr1	2069477	1	1	0.333333	0.75	0.272727	0	0	0	0	0	0	0	0	1
chr1	2069482	0.916667	1	0.25	0.538462	0.25	0	0	0	0	0	0	0	0	0
chr1	2069493	0.971429	0.7	0	0.636364	0.454545	0	0	0	0	0	0	0	0	0
chr1	2069506	0.974359	1	0.333333	0.5	0.454545	0	0	0	0	0	0	0	0	0
chr1	2071147	0.971429	0.8	0.625	0.823529	0.8125	0.285714	0.230769	0.571429	0	0.363636	0.571429	0.176471	0	0
chr1	2071162	0.935484	1	0.714286	0.823529	0.789474	0.428571	0.461538	0.5	0	0.6	0.428571	0.375	0	0
chr1	2071207	0.866667	1	0.8	0.625	0.416667	0	0	0	0	0	0	0	0	1
chr1	2071817	0.953846	1	0.8	0.5	0.9	0.5	0	0	0	0	0	0.375	0	0
chr1	2071819	0.969231	1	0.866667	0.75	0.9	0.666667	0.428571	0	0.272727	0	0	0.428571	0	0
chr1	2071829	0.956522	1	0.733333	0.5	0.727273	0	0	0	0	0	0	0	0	0
chr1	2071857	0.957143	1	0.545455	0.75	0.454545	0	0	0	0	0	0	0	0	0
chr1	2071889	0.944444	0.857143	0.5	1	0.8	0	0	0	0	0	0	0	0	0
chr1	2071956	0.893333	1	0.571429	0.571429	0.428571	0	0	0	0	0	0	0	0	0
chr1	2071988	0.984848	1	0.666667	0.4	0.5	0.285714	0	0	0	0	0	0	0.285714	0
chr1	2073076	1	1	0.6	0.5	0.230769	0	0	0	0	0	0	0.25	0	0
chr1	2075660	0.953846	1	0.857143	0.428571	0.571429	0	0	0	0.272727	0	0	0	0	1
chr1	2075977	0.983051	1	0.833333	0.7	0.384615	0.307692	0.285714	0	0	0	0	0	0	0
chr1	2076030	0.928571	1	0.625	0.6	0.5	0	0.190476	0	0	0	0	0	0.214286	0
chr1	2076037	0.943396	1	0.571429	0.666667	0.533333	0.333333	0.222222	0	0	0	0	0.214286	0	0
chr1	2085571	0.964912	1	0.5	0.285714	0.5	0.121212	0.2	0	0	0	0	0.133333	0	0
chr1	2085604	1	1	0.857143	0.285714	0.5	0.372093	0.277778	0	0	0.30303	0	0.21875	0	0
chr1	2085607	1	0.875	0.428571	0	0.5	0.232558	0	0	0	0	0	0.15625	0	0
chr1	2085648	0.941176	1	0.714286	0.533333	0.545455	0.272727	0.294118	0	0	0	0	0.285714	0	1
chr1	2085656	0.971831	1	0.5	0.533333	0.333333	0.153846	0.1875	0	0	0	0	0.275862	0	0
chr1	2085665	0.952381	1	0.714286	0.6	0.416667	0.217391	0.1875	0	0	0	0	0	0	0
chr1	2086572	0.953947	0.666667	1	0.85	0.55	0.411765	0.428571	0.538462	0.225806	0.178571	0.275862	0.172414	0.222222	0
chr1	2086616	0.977901	1	0.857143	0.769231	0.571429	0.25	0.183333	0	0.185185	0.179487	0	0.15	0.156863	0
chr1	2086648	0.983425	1	0.909091	0.956522	0.809524	0.88764	0.911765	0.863636	0.849315	0.891892	0.87037	0.892857	0.833333	0
chr1	2086666	0.97619	1	0.909091	0.923077	0.761905	0.858586	0.901639	0.851852	0.894737	0.9375	0.87037	0.929577	0.897959	0
chr1	2086708	0.983871	1	0.818182	0.916667	0.76	0.690722	0.684932	0.538462	0.5	0.809524	0.603448	0.507692	0.651163	1
chr1	2086795	0.962264	0.9	0.444444	0.705882	0.64	0.790698	0.632353	0.6	0.659091	0.710526	0.547619	0.692308	0.583333	0
chr1	2086840	0.955128	1	0.833333	0.9375	0.772727	0.793103	0.720588	0.68	0.826923	0.844444	0.625	0.810345	0.677419	0
chr1	2086870	0.980645	1	0.666667	0.833333	0.826087	0.7625	0.623529	0.518519	0.607843	0.583333	0.492537	0.540984	0.645161	0
chr1	2086912	0.978723	1	0.833333	0.875	0.875	0.893939	0.763889	0.481481	0.843137	0.740741	0.594595	0.492754	0.735294	0
chr1	2086939	0.948529	1	1	0.785714	0.909091	0.746988	0.906667	0.741935	0.754386	0.823529	0.586667	0.753846	0.847826	0
chr1	2087205	0.957143	1	0.5	0.5	0.923077	0.581818	0.389831	0	0.25	0.266667	0.425	0.346154	0.181818	0
chr1	2087743	1	0.857143	0.8	0.533333	0.416667	0	0	0	0	0.272727	0	0.333333	0	0
chr1	2090903	0.941176	1	0.666667	0.833333	0.75	0.25	0.384615	0	0	0	0.272727	0.333333	0.4	0
chr1	2090953	0.952381	1	0	0.461538	0.384615	0	0	0	0	0	0	0.166667	0	1
chr1	2092256	0.941176	1	0.666667	0.6	0.5	0	0	0	0	0	0	0	0	0
chr1	2092283	0.981132	1	0.333333	0.3125	0.375	0.173913	0	0	0	0	0	0	0	0
chr1	2092288	0.963636	1	0.333333	0.642857	0.75	0.391304	0	0.230769	0	0	0	0	0.333333	0
chr1	2092293	0.963636	1	0.333333	0.642857	0.555556	0.304348	0	0	0	0	0	0	0.142857	0
chr1	2092296	0.980769	1	0.333333	0.5	0.625	0.24	0	0	0	0	0	0.228571	0.375	0
chr1	2092344	0.944444	0.909091	0.6	0.833333	0.5	0	0	0	0	0	0	0	0.157895	0
chr1	2092391	0.938776	1	0.666667	0.727273	0.615385	0.148148	0.130435	0	0	0	0	0	0.157895	0
chr1	2092394	0.980769	0.888889	0.5	0.818182	0.692308	0	0	0	0	0	0	0	0	0
chr1	2092397	0.98	0.888889	0.571429	0.636364	0.538462	0	0	0	0	0	0	0	0.142857	0
chr1	2092400	0.94	0.875	0.666667	0.727273	0.533333	0.16129	0	0	0	0	0	0	0	0
chr1	2093017	0.985507	1	0.3	0.333333	0.692308	0	0	0	0.15	0	0	0	0	0
chr1	2095999	0.928571	0.8	0.6	0.444444	0.466667	0.555556	0.454545	0.6	0.416667	0.423077	0	0.52	0.333333	0
chr1	2096959	0.983051	1	0.8	0.375	0.2	0.1875	0	0	0	0	0	0	0	0
chr1	2096981	0.927273	0.9	1	0.555556	0.466667	0.461538	0	0	0	0	0	0	0	0
chr1	2099006	0.972973	0.7	0.727273	0.8	0.454545	0	0	0	0	0	0	0	0	0
chr1	2104860	0.914894	1	0.6	0.333333	0.454545	0	0	0	0	0	0	0	0	0
chr1	2104886	0.978261	1	0.6	0.333333	0.583333	0	0	0	0	0	0	0	0	0
chr1	2107242	0.931034	1	0.5	0.666667	0	0.210526	0	0	0	0	0	0	0	0
chr1	2107248	1	0.8	0.25	0.8	0.285714	0.25	0	0	0	0	0	0	0	0
chr1	2107611	0.982456	1	0	0.545455	0.5	0	0	0	0	0	0	0.173913	0	0
chr1	2107644	0.892857	1	0.4	0.666667	0.333333	0.2	0	0	0	0	0	0	0	0
chr1	2110886	0.933333	0.6	0.714286	0.444444	0.444444	0	0.121212	0	0	0	0.375	0	0	0
chr1	2111851	0.984848	1	0.642857	0.6	0.466667	0	0	0	0	0	0	0	0	0
chr1	2111855	0.962406	1	0.571429	0.333333	0.333333	0	0	0	0	0	0	0	0	0
chr1	2111858	0.969697	1	0.692308	0.7	0.642857	0	0	0	0	0	0	0	0	0
chr1	2111868	0.985401	1	0.416667	0.6	0.5	0	0	0	0	0	0	0	0	0
chr1	2111900	0.992	1	0.818182	0.666667	0.4375	0.148148	0	0	0	0	0	0	0	0
chr1	2111912	0.968992	1	0.8	0.8	0.5	0	0	0	0	0	0	0	0	0
chr1	2111915	0.953846	1	0.666667	0.7	0.733333	0.185185	0	0	0	0	0	0	0	0
chr1	2111938	0.984496	1	0.777778	0.6	0.785714	0	0	0	0	0	0	0	0	1
chr1	2111949	0.992537	1	0.714286	0.4	0.769231	0	0	0	0	0	0	0	0	0
chr1	2111955	0.955224	0.833333	0.75	0.7	0.666667	0	0	0	0	0	0	0	0	0
chr1	2111966	0.961538	1	0.857143	0.777778	0.583333	0.137931	0	0	0	0	0	0	0	0
chr1	2111972	0.96	1	0.857143	0.625	0.785714	0	0	0	0	0	0	0	0	0
chr1	2111976	0.976	1	0.857143	0.75	0.785714	0.148148	0	0	0	0	0	0	0	0
chr1	2111980	0.976378	1	0.833333	0.625	0.666667	0	0	0	0	0	0	0	0	0
chr1	2111983	0.952381	1	0.6	0.625	0.5	0	0	0	0	0	0	0	0	0
chr1	2111997	0.983471	0.5	0.333333	0.428571	0.5	0	0	0	0	0	0	0	0	0
chr1	2112000	0.95	1	0.5	0.571429	0.444444	0	0	0	0	0	0	0	0	0
chr1	2112006	0.982759	1	0.5	0.857143	0.470588	0	0	0	0	0	0	0	0	0
chr1	2112023	0.935185	0.4	0.714286	0.5	0.5	0.181818	0	0	0	0	0	0	0	0
chr1	2114386	0.925	1	0.666667	0.272727	0.7	0.344828	0.148148	0	0	0	0	0	0	0
chr1	2114390	0.974684	1	0.5	0.454545	0.555556	0.346154	0.192308	0	0	0.25	0	0	0	1
chr1	2114392	0.962025	1	0.666667	0.4	0.454545	0.321429	0.148148	0	0	0	0	0	0.3	0
chr1	2114402	0.960526	1	0.666667	0.454545	0	0	0	0	0	0	0	0	0	0
chr1	2114758	0.987342	1	0.4	0.4375	0.272727	0.4375	0.2	0	0	0.4	0	0.285714	0	0
chr1	2114781	0.987805	1	0.6	0.266667	0.333333	0.5625	0.2	0	0	0.272727	0.266667	0.428571	0	0
chr1	2114787	0.936709	1	0.6	0.571429	0.4	0.5	0.4	0	0.2	0.3	0.230769	0.285714	0	0
chr1	2114789	0.910256	1	0.875	0.466667	0.555556	0.384615	0	0	0	0.272727	0	0.285714	0	0
chr1	2114889	0.945946	1	0.285714	0	0.375	0.263158	0.176471	0	0	0.2	0	0	0	0
chr1	2115179	0.8	0.833333	0.571429	0.384615	0.166667	0	0	0	0	0	0	0	0	1
chr1	2115464	0.964286	1	0.5	0.538462	0.5	0.2	0.142857	0	0	0	0	0	0	0
chr1	2115478	0.969231	1	1	0.461538	0.666667	0.466667	0.45	0	0.294118	0.333333	0	0	0	1
chr1	2115487	1	1	0.666667	0.416667	0.6	0.380952	0.333333	0	0.157895	0	0	0	0	0
chr1	2115495	0.936508	1	0.5	0.384615	0.5	0.227273	0.190476	0	0	0	0	0	0	1
chr1	2115508	0.9375	1	0.333333	0.384615	0.307692	0.2	0.190476	0	0	0	0	0	0	0
chr1	2115555	1	0.875	0	0.4	0.5	0	0	0	0	0	0	0	0	0
chr1	2115581	1	1	0.4	0.5	0.357143	0	0	0	0	0	0	0	0	0
chr1	2115602	0.921875	0.875	0.4	0.5	0.357143	0	0.214286	0	0	0	0	0	0	0
chr1	2115675	0.906977	1	0.6	0.444444	0	0	0	0	0	0	0	0	0	1
chr1	2115685	0.956522	1	0	0.5	0	0.2	0	0	0	0	0	0	0	0
chr1	2116560	0.943662	1	0.5	0.636364	0.666667	0.307692	0	0	0	0	0	0.173913	0	0
chr1	2116566	0.970588	1	0.6	0.727273	0.733333	0.545455	0	0	0	0.230769	0	0	0	0
chr1	2116569	0.971014	1	0.6	0.636364	0.533333	0.5	0	0	0	0.24	0	0	0	1
chr1	2116575	0.971014	1	0.6	0.636364	0.6	0.4	0	0	0	0.25	0	0	0	0
chr1	2116587	0.943662	1	0.5	0.538462	0.583333	0.538462	0.181818	0	0	0.157895	0	0	0	0
chr1	2116593	0.985915	1	0.4	0.533333	0.6	0.384615	0.15	0	0	0.190476	0	0	0	0
chr1	2116597	1	1	0.666667	0.6	0.666667	0.363636	0	0	0	0.142857	0	0	0	0
chr1	2129617	0.928571	0.333333	0	0.3	0	0	0	0	0	0	0	0	0	0
chr1	2129671	1	0	0	0.230769	0	0	0	0	0	0	0	0	0	0
chr1	2132705	0.97619	0.6	0.5	0.294118	0.5	0	0.2	0	0	0	0	0	0	0
chr1	2135251	0.985714	0.428571	0.4	0.272727	0	0	0	0	0	0	0	0	0	0
chr1	2135253	0.902778	0.428571	0.3	0.25	0	0	0	0	0	0	0	0	0	0
chr1	2145777	0.943396	0	0.333333	0	0	0	0	0	0	0	0	0	0	0
chr1	2145970	1	0	0	0	0	0	0	0	0	0	0	0	0	0
chr1	2147397	0.913043	0	0	0	0	0	0	0	0	0	0	0	0	1
chr1	2147443	0.530612	0	0	0	0	0	0.26087	0	0	0	0	0	0	0
chr1	2147472	0.943396	0	0.4	0	0	0.166667	0.181818	0	0	0	0	0.241379	0	1
chr1	2147513	0.983607	0	0.333333	0	0	0	0	0	0	0	0	0.259259	0	1
chr1	2147551	0.941176	0	0	0	0.5	0.235294	0.181818	0	0	0	0	0.333333	0	0
chr1	2147570	1	0	0	0.375	0	0.238095	0.190476	0	0	0	0	0.272727	0	0
chr1	2147575	0.968254	0	0	0	0.266667	0.217391	0	0	0	0	0	0.26087	0	0
chr1	2147580	0.984615	0	0	0.375	0.2	0.2	0	0	0	0	0	0.24	0	0
chr1	2161080	0	0	0	0	0	0	0	0	0	0	0	0	0	1
chr1	2161498	0	0	0	0	0	0	0	0	0	0	0	0	0	0
chr1	2161506	0	0	0	0	0	0	0	0	0	0	0	0	0	0
chr1	2161680	0	0	0	0	0	0	0	0	0	0	0	0	0	1
chr1	2162775	0.888889	0	0	0	0	0	0	0	0	0	0	0	0	0
chr1	2162796	0.865385	0	0	0	0	0	0	0	0	0	0	0	0	0
chr1	2164822	0.913793	0	0	0	0	0	0	0	0	0	0	0	0	0
chr1	2164949	0.95082	1	0	0.3	0	0	0	0	0	0	0	0	0	0
chr1	2167258	0.981481	0.6	0	0.384615	0.5	0.25	0.173913	0	0	0.25	0	0.318182	0	1
chr1	2167329	0.918367	0.8	0	0	0	0	0	0	0	0	0	0	0	0
chr1	2167707	0.918367	1	0.5	0	0.333333	0	0	0	0	0	0	0	0	0
chr1	2170171	1	1	0.333333	0.555556	0	0.181818	0	0	0	0	0	0	0	1
chr1	2170174	0.985075	1	0.285714	0.375	0	0.190476	0	0	0	0	0	0	0	0
chr1	2170205	0.933333	0	0.285714	0.444444	0.375	0	0	0	0	0	0	0	0	0
chr1	2171026	1	0.4	0	0	0	0.272727	0	0	0	0	0	0.235294	0	0
chr1	2171108	0.911111	1	0.285714	0	0	0.230769	0	0	0	0	0	0	0	0
chr1	2171773	0.895833	0.8	0	0.285714	0	0	0	0	0	0	0	0	0	0
chr1	2172329	0.944444	1	0.25	0.25	0	0.176471	0	0	0	0.3125	0	0	0	0
chr1	2172332	0.973684	0.333333	0.25	0.25	0	0	0	0	0	0	0	0	0	0
chr1	2172432	0.975	0.5	0.6	0	0	0	0	0	0	0.2	0	0.176471	0	0
chr1	2173811	0.966667	1	0.3	0	0	0	0	0	0	0	0.285714	0	0	0
chr1	2174906	0.980769	1	0.375	0.642857	0.444444	0	0.157895	0	0	0	0	0	0	1
chr1	2174962	0.942529	1	0	0.25	0.5	0	0	0	0	0	0	0	0	0
chr1	2175075	0.951613	1	0.3	0.3	0.4	0.130435	0	0	0	0	0	0	0	0
chr1	2175095	0.951613	1	0.454545	0.25	0	0	0	0	0	0	0	0	0	0
chr1	2175116	0.955882	0.625	0	0.285714	0.4	0.26087	0.222222	0	0	0	0	0	0	0
chr1	2175135	0.938462	0.625	0	0	0.214286	0	0	0	0	0	0	0	0	0
chr1	2175185	0.967213	1	0.25	0.3	0	0	0	0	0	0	0	0	0	1
chr1	2179814	0.931818	0	0	0	0	0	0	0	0	0	0	0	0	0
chr1	2179831	0.941176	0	0	0	0	0	0	0	0	0	0	0	0	1
chr1	2179958	1	0	0	0	0	0.181818	0	0	0	0	0	0	0	0
chr1	2180314	0.978261	0.5	0	0	0	0	0	0	0	0	0	0	0	0
chr1	2180408	0.981481	0.333333	0.25	0.3	0.454545	0.307692	0	0	0	0	0	0	0.25	0
chr1	2180416	0.963636	0.333333	0	0.25	0	0.214286	0	0	0	0	0	0	0	0
chr1	2180466	0.95082	0.25	0	0	0.25	0	0	0	0	0	0	0	0	1
chr1	2180697	0.963855	0	0	0	0	0.121212	0.205882	0	0	0	0	0	0	0
chr1	2180732	0.985915	0	0.333333	0	0	0.129032	0	0	0	0	0	0.190476	0	0
chr1	2180973	0.95122	0	0.333333	0	0	0	0	0	0	0	0	0	0	0
chr1	2180994	0.948718	0	0.4	0	0	0	0	0.25	0	0.148148	0	0	0	0
chr1	2183868	0.97619	1	0	0	0	0.214286	0	0	0	0	0	0	0	0
chr1	2185982	1	0.8	0.285714	0.333333	0.615385	0	0.307692	0	0	0.227273	0.25	0	0	0
chr1	2188138	0.958904	1	0.571429	0.8	0.538462	0.75	0.2	0	0.214286	0.375	0	0.473684	0.8	1
chr1	2189858	0.965517	1	0.333333	0.285714	0.214286	0	0	0	0	0	0	0	0	0
chr1	2190265	1	1	0.5	0.1875	0.166667	0	0	0	0	0	0	0	0	0
chr1	2190690	0.974359	1	0.625	0	0	0	0	0	0	0	0	0	0	0
chr1	2190743	0.4375	1	0.75	0.3	0	0	0	0	0	0	0	0	0	0
chr1	2191725	0.954545	1	0.285714	0.727273	0.384615	0	0	0	0	0	0	0	0	0
chr1	2193306	0.948718	1	0	0.571429	0	0	0	0	0	0	0	0	0	0
chr1	2200730	1	1	0	0.307692	0.538462	0.318182	0.26087	0	0.166667	0.190476	0.4	0	0	0
chr1	2203231	1	1	0.3	0.4	0	0	0	0	0	0	0	0	0	0
chr1	2203247	0.979592	0.8	0.4	0.555556	0	0	0	0	0	0	0	0	0	0
chr1	2203275	0.977778	0.4	0.555556	0.6	0	0.25	0	0	0	0	0	0.153846	0	0
chr1	2203362	0.963636	1	0	0.363636	0.25	0	0	0	0	0	0	0	0	0
chr1	2204940	0.95	1	0	0	0	0	0	0	0	0	0	0	0	0
chr1	2205334	0.939394	1	0.5	0	0.307692	0.2	0.166667	0	0	0	0	0	0	0
chr1	2206201	0.966102	1	0	0.25	0.25	0	0	0	0	0	0	0	0	0
chr1	2206385	0.953488	0.714286	0.5	0.428571	0.416667	0.25	0.333333	0	0	0	0	0.428571	0	0
chr1	2209685	0.9	1	0.571429	0.333333	0	0	0	0	0	0	0	0	0	0
chr1	2209800	0.964912	1	0.714286	0.6	0	0	0	0	0	0	0	0	0	0
chr1	2213529	0.986111	1	1	0.9375	0.857143	0.375	0.25	0	0	0.473684	0.4	0	0	0
chr1	2214957	1	1	0.25	0.363636	0.25	0.230769	0.166667	0	0	0	0	0	0	0
chr1	2214983	0.95122	1	0.5	0.384615	0.285714	0.230769	0.222222	0	0	0	0	0	0	0
chr1	2215166	0.982456	1	0	0.666667	0.428571	0	0	0	0	0	0	0	0	0
chr1	2216316	0.944444	1	0	0.642857	0.625	0.230769	0.241379	0	0	0.1875	0	0.2	0	0
chr1	2218629	0.861111	1	1	0.727273	0.666667	0	0	0	0	0	0	0	0	1
chr1	2218633	0.914286	1	0.875	0.727273	0.571429	0.545455	0.363636	0	0.25	0.5	0	0.266667	0	0
chr1	2218646	0.933333	1	1	0.727273	0.428571	0	0	0	0	0.375	0	0	0	0
chr1	2218683	0.939394	1	1	0.666667	0	0	0	0	0	0	0	0	0	0
chr1	2218696	0.941176	1	1	0.555556	0	0	0	0	0	0	0	0	0	0
chr1	2222537	0.97561	1	0.375	0.285714	0.6	0	0	0	0	0	0	0	0	0
chr1	2222551	0.837838	1	0.625	0.375	0.4	0	0	0	0	0	0	0	0	1
chr1	2222558	1	1	0.714286	0.5	1	0	0	0	0	0	0	0	0	0
chr1	2222568	1	1	0.666667	0.375	0.666667	0	0	0	0	0	0	0	0	0
chr1	2224083	0.955556	0.8	0.6	0	0.333333	0	0	0	0	0	0	0	0	0
chr1	2225436	0.958333	0.5	0.6	0.25	0	0	0.173913	0	0	0	0	0	0	0
chr1	2229502	0.869565	0.6	0.4	0	0	0	0.176471	0	0	0.235294	0	0	0	0
chr1	2230453	1	1	0.333333	0	0	0	0	0	0	0	0	0	0	0
chr1	2231383	0.92	0.6	0.4	0	0	0	0	0	0	0	0	0	0	0
chr1	2231498	1	1	0	0.3	0	0	0.272727	0	0	0	0	0	0	0
chr1	2233403	1	0.285714	0	0	0	0	0	0	0.2	0	0	0	0	0
chr1	2236307	0.754717	0	0	0	0	0	0.142857	0	0	0	0	0	0	0
chr1	2236450	0.857143	0.8	0	0	0	0	0	0	0	0	0	0	0	0
chr1	2236466	0.769231	0.5	0	0	0	0	0	0	0	0	0	0	0	1
chr1	2236483	0.945455	0.8	0	0.25	0	0	0	0	0	0	0	0	0	0
chr1	2238318	0	0	0	0	0	0	0	0	0	0	0	0	0	0
chr1	2238334	0	0	0	0	0	0	0	0	0	0	0	0	0	0
chr1	2245760	0	0	0	0	0	0	0	0	0	0	0	0	0	0
chr1	2247645	0.912281	0	0	0	0	0	0	0	0	0	0	0	0	0
chr1	2249473	0.961538	0	0	0	0	0	0	0	0	0	0	0	0	0
chr1	2251945	0.934426	0	0	0	0	0.1875	0	0	0	0	0	0	0	0
chr1	2252613	0.931034	0	0	0.363636	0	0	0.142857	0	0	0	0.2	0	0.375	1
chr1	2252729	0.925373	0	0	0	0	0	0.15625	0	0	0	0	0	0	0
chr1	2254103	0.978723	0	0	0	0	0	0.157895	0	0	0	0	0	0.4	0
chr1	2254127	1	0	0	0	0	0.210526	0	0	0	0	0	0	0.285714	1
chr1	2254150	0.927273	0	0	0	0	0.190476	0	0	0	0	0	0	0	0
chr1	2255708	0.980392	0.333333	0	0.272727	0	0.25	0.16	0	0	0	0	0	0	0
chr1	2255737	0.982759	0.6	0	0	0	0	0	0	0	0	0.285714	0	0	1
chr1	2261198	0.983871	0	0	0	0	0	0	0	0	0	0	0	0	0
chr1	2265697	0.95122	0.5	0	0	0	0	0.16	0	0	0	0	0	0	0
chr1	2265710	0.97561	0	0	0.285714	0	0	0	0	0	0	0	0	0	0
chr1	2265755	0.977778	0	0	0	0	0	0.148148	0	0	0	0	0	0	0
chr1	2269502	0.95	0	0	0	0	0	0	0	0	0	0	0	0	0
chr1	2273779	0.897959	0.285714	0	0	0	0.266667	0	0	0	0	0	0	0	1
chr1	2273781	0.962264	0.285714	0	0	0	0.375	0	0	0	0	0	0	0	0
chr1	2274837	0.980769	0	0.25	0	0	0.454545	0	0	0	0.25	0	0	0	0
chr1	2274854	0.98	0	0	0	0.294118	0	0	0	0	0	0	0	0	0
chr1	2274864	1	0	0	0	0.333333	0	0	0	0	0	0	0	0	0
chr1	2274994	1	0	0	0	0	0	0	0	0	0	0	0	0	0
chr1	2275006	0.956522	0	0	0	0	0	0	0	0	0	0	0	0	0
chr1	2275050	0.913043	0	0	0	0	0	0	0	0	0	0	0.333333	0	1
chr1	2282601	1	0	0	0	0	0.384615	0	0	0	0	0	0	0	1
chr1	2282672	0.983051	0	0	0.285714	0	0.285714	0.15	0	0	0	0	0	0	1
chr1	2282707	0.960784	0	0	0.285714	0	0	0	0	0	0	0	0	0	0
chr1	2284414	0.967213	0	0	0	0	0	0	0	0	0	0	0	0	0
chr1	2286570	0.910714	0	0	0	0	0	0	0	0	0.2	0	0	0	0
chr1	2286661	0.936508	0	0	0	0	0.157895	0	0	0	0.222222	0	0	0	0
chr1	2286710	0.963636	0	0	0.25	0	0	0	0	0	0	0	0	0	1
chr1	2287498	0.96	0.8	0	0	0.555556	0.190476	0	0	0	0	0	0	0	0
chr1	2287534	1	0	0	0	0	0	0	0	0	0	0	0	0	0
chr1	2287585	1	0.666667	0.428571	0.1875	0	0.416667	0.407407	0	0	0	0	0.121951	0	0
chr1	2287588	0.981132	0.428571	0.4	0.1875	0	0.304348	0.25	0	0	0	0	0.136364	0	0
chr1	2287590	0.981132	0.5	0.4	0.176471	0	0.291667	0.214286	0	0	0	0	0.170213	0	0
chr1	2287701	0.956522	0.363636	0.4	0	0	0.15	0	0	0	0	0	0.15625	0	0
chr1	2287706	0.984848	0.363636	0.333333	0.176471	0	0.227273	0	0	0	0	0	0.27027	0	0
chr1	2287741	0.964912	0.4	0	0	0	0	0	0	0	0	0	0.129032	0	0
chr1	2287763	0.898305	0	0	0.176471	0	0	0	0	0	0	0	0	0	0
chr1	2287768	0.929825	0	0	0.1875	0	0.136364	0	0	0	0	0	0	0	0
chr1	2288084	0.952381	0	0	0.3	0.333333	0	0	0	0	0	0	0	0	1
chr1	2288091	1	0	0	0.333333	0.333333	0	0	0	0	0	0	0	0	0
chr1	2288115	0.981818	0	0	0	0.25	0	0	0	0	0	0	0	0	0
chr1	2288140	1	0.4	0.266667	0	0.25	0	0	0	0	0	0	0	0	0
chr1	2288151	0.981481	0.4	0.266667	0	0	0	0	0	0	0	0	0.333333	0	0
chr1	2288165	1	0	0.375	0	0	0.2	0.136364	0	0	0	0	0	0	0
chr1	2288167	0.962264	0	0.3125	0	0	0	0	0	0	0	0	0	0	1
chr1	2288182	0.943396	0	0.3125	0	0	0.1875	0.15	0	0	0	0	0	0	0
chr1	2288226	0.947368	0	0	0	0	0	0.266667	0	0	0	0	0	0	0
chr1	2288234	0.92	0.4	0	0.285714	0.285714	0.25	0.166667	0	0	0	0	0	0	0
chr1	2288373	0.957447	0.6	0.375	0	0	0.3	0	0	0	0	0	0	0	1
chr1	2288397	1	0.571429	0.285714	0	0	0	0	0	0	0	0	0	0	0
chr1	2288405	0.958333	0.285714	0.25	0	0	0	0	0	0	0	0	0	0	1
chr1	2288417	0.963636	0.5	0.25	0	0	0	0	0	0	0	0	0	0	0
chr1	2288427	0.962963	0.666667	0.25	0	0	0	0	0	0	0	0	0.148148	0	0
chr1	2288435	0.963636	0.666667	0	0	0.272727	0.16	0	0	0	0	0	0.153846	0	0
chr1	2288451	0.912281	0.4	0	0	0	0	0	0	0	0	0.25	0	0	0
chr1	2288463	0.964912	0.8	0.333333	0	0.363636	0	0	0	0	0	0	0	0	0
chr1	2288466	0.962963	0.8	0	0	0	0.315789	0	0	0	0	0	0.130435	0.25	0
chr1	2288469	0.946429	0.8	0	0	0.272727	0.166667	0	0	0	0	0	0	0.375	0
chr1	2288471	1	0.6	0	0	0.272727	0	0	0	0	0	0	0	0.333333	0
chr1	2291677	1	0.6	0	0	0.230769	0	0	0	0	0	0	0	0	0
chr1	2291794	0.979592	0.285714	0.333333	0.166667	0.166667	0	0	0	0	0	0	0	0.25	0
chr1	2291827	0.978723	0.5	0.3	0.157895	0	0	0	0	0	0	0	0	0.333333	0
chr1	2291873	0.923077	0	0.375	0	0	0	0	0	0	0	0	0	0	1
chr1	2291876	0.921569	0.5	0.333333	0.1875	0.2	0	0	0	0	0	0	0	0	0
chr1	2291916	0.976744	0	0	0.1875	0	0	0	0	0	0	0	0	0	0
chr1	2293910	0.944444	0	0.428571	0.4	0	0.285714	0	0	0	0.285714	0	0.272727	0	0
chr1	2299825	1	1	0.857143	0.636364	0.733333	0.636364	0.8125	0.428571	0.307692	0.461538	0.333333	0.666667	0.363636	0
chr1	2299958	0.852941	1	0.9	0.615385	0.444444	0.5	0	0	0	0	0	0	0	0
chr1	2307530	0.981481	0	0	0.3	0.333333	0	0	0	0	0	0	0	0	0
chr1	2307941	0.941176	0.333333	0	0	0	0	0	0	0	0	0	0	0	0
chr1	2310302	1	0	0.333333	0	0	0	0	0	0	0	0	0	0	0
chr1	2311579	0.966102	0	0	0	0	0.176471	0.228571	0	0	0	0	0	0	1
chr1	2313621	0.953125	1	0	0	0.444444	0.214286	0	0	0	0	0	0	0	0
chr1	2314200	0.972603	0	0.5	0	0	0.3	0	0	0	0	0	0.2	0	0
chr1	2314233	0.92	0	0	0	0	0	0	0	0	0	0	0	0	0
chr1	2314236	0.931507	0.4	0	0.333333	0	0	0	0	0	0	0.25	0	0	1
chr1	2314252	0.961039	0	0	0	0	0	0	0	0	0	0	0	0	0
chr1	2317668	1	1	0.625	0.333333	0	0	0	0	0	0	0	0	0	0
chr1	2320730	0.933333	1	0	0	0	0	0	0	0	0	0	0	0.333333	0
chr1	2321364	0.727273	0	0	0	0	0	0.230769	0	0	0	0	0	0	0
chr1	2321548	0.641509	0.857143	0.285714	0.2	0	0	0	0	0	0	0	0	0	0
chr1	2322868	0	0	0	0	0	0	0	0	0	0	0	0	0	0
chr1	2322878	0	0	0	0	0	0	0	0	0	0	0	0	0	0
chr1	2322885	0	0	0	0	0	0	0	0	0	0	0	0	0	0
chr1	2322891	0	0	0	0	0	0	0	0	0	0	0	0	0	0
chr1	2322897	0	0	0	0	0	0	0	0	0	0	0	0	0	0
chr1	2322902	0	0	0	0	0	0	0	0	0	0	0	0	0	0
chr1	2322907	0	0	0	0	0	0	0	0	0	0	0	0	0	0
chr1	2322911	0	0	0	0	0	0	0	0	0	0	0	0	0	0
chr1	2322919	0	0	0	0	0	0	0	0	0	0	0	0	0	0
chr1	2322938	0	0	0	0	0	0	0	0	0	0	0	0	0	0
chr1	2323763	0	0	0	0	0	0	0	0	0	0	0	0	0	0
chr1	2323820	0	0	0	0	0	0	0	0	0	0	0	0	0	0
chr1	2324154	0	0.5	0	0.230769	0	0	0	0	0	0	0	0	0	0
chr1	2324285	0.0930233	0.833333	0	0.571429	0	0	0	0	0	0	0	0	0	0
chr1	2325675	0.833333	1	0.428571	0.272727	0.461538	0.214286	0	0	0	0	0	0	0	0
chr1	2325824	0.921053	1	0.5	0.4375	0	0	0	0	0	0	0	0.25	0	0
chr1	2325832	0.944444	1	0.428571	0.214286	0	0	0	0	0	0	0	0	0	0
chr1	2326257	0.941176	1	0.333333	0.4	0	0	0.136364	0	0	0	0	0	0	0
chr1	2326645	0.914894	1	0.625	0.538462	0.176471	0	0	0	0	0	0	0	0	0
chr1	2326654	0.9375	1	0.571429	0.615385	0.333333	0	0	0	0	0	0	0	0	0
chr1	2329123	0.925	1	0	0	0.3125	0	0	0	0	0	0	0	0	0
chr1	2329126	0.95122	0.833333	0	0	0.375	0	0	0	0	0	0.333333	0	0	1
chr1	2329176	0.96875	0.857143	0	0	0.357143	0	0	0	0	0	0	0	0	0
chr1	2329186	0.962963	1	0.666667	0.5	0.363636	0	0.444444	0	0	0	0	0	0	0
chr1	2329211	1	1	0.285714	0.375	0	0.214286	0.230769	0	0	0	0	0	0	1
chr1	2329255	0.965517	0.666667	0	0	0.4	0	0	0	0	0	0	0	0	1
chr1	2331592	0.912281	1	0.666667	0.333333	0	0	0.235294	0	0	0	0	0	0	0
chr1	2331645	0.926829	1	0.6	0	0.25	0	0	0	0	0	0	0	0	0
chr1	2332308	1	1	0.571429	0.461538	0.333333	0	0	0	0	0	0	0	0	0
chr1	2332327	0.941176	1	0.5	0.307692	0	0	0	0	0	0	0	0	0	0
chr1	2333651	1	1	0.5	0.470588	0.285714	0	0	0	0	0	0	0	0.333333	0
chr1	2334037	0.947368	1	0.7	0.714286	0.6	0.208333	0	0	0	0	0	0	0	0
chr1	2334040	1	1	0.636364	0.625	0.454545	0	0	0	0	0	0	0	0	0
chr1	2334054	0.942857	1	0.416667	0.625	0.454545	0.208333	0	0	0	0	0	0	0	0
chr1	2334084	0.95082	0.8	0.5	0.4	0.583333	0.25	0.148148	0	0	0	0	0.173913	0	1
chr1	2334098	0.898305	1	0.555556	0.333333	0.583333	0	0	0	0	0	0	0	0.25	0
chr1	2334128	0.923077	1	0.714286	0.375	0.285714	0	0.129032	0	0	0	0	0	0	1
chr1	2334136	0.955556	1	0.5	0.625	0.769231	0.25	0.16129	0	0	0	0	0	0.285714	1
chr1	2334152	0.914894	1	0.375	0.5	0.454545	0.272727	0.192308	0	0	0	0	0	0	1
chr1	2335019	0.967742	0.4	0.4	0.285714	0	0	0	0	0	0	0	0	0	0
chr1	2335719	0.978723	0.6	0.636364	0.230769	0.1875	0	0	0	0	0	0	0	0	0
chr1	2335784	0.977778	0.75	0.636364	0.333333	0.25	0	0	0	0	0	0	0	0	1
chr1	2338535	0.9875	1	0.285714	0.3125	0.8	0.178571	0	0	0	0	0	0	0	0
chr1	2338832	0.960784	1	0.4	0.363636	0.176471	0	0	0	0	0	0	0	0	0
chr1	2339294	0.985294	0.8	0.272727	0.466667	0.333333	0.121212	0.212121	0	0.148148	0	0	0	0	0
chr1	2339557	1	1	0.4	0.375	0	0	0	0	0	0	0	0.125	0	0
chr1	2346009	0.606061	0	0	0	0	0	0	0	0	0	0	0	0	0
chr1	2348669	0.954545	0	0.333333	0	0	0.178571	0	0	0	0	0	0	0	0
chr1	2348982	1	0	0	0	0	0.16	0	0	0	0	0	0	0	0
chr1	2349162	0.948276	0	0.4	0	0	0	0	0	0	0	0	0	0	0
chr1	2351918	0.952381	0.333333	0	0	0	0.121212	0	0	0	0	0	0	0	0
chr1	2351946	0.974359	0.333333	0	0	0	0.138889	0	0	0	0	0	0	0	0
chr1	2351963	0.97561	0	0	0	0	0	0	0	0	0	0	0	0	1
chr1	2355252	0.954545	0	0	0	0	0	0	0	0	0.2	0	0	0	0
chr1	2359180	0.934783	0.4	0	0	0	0.4375	0	0	0.142857	0	0	0	0	1
chr1	2359342	0.982759	0	0	0	0	0	0	0	0	0	0	0	0	1
chr1	2359400	1	0	0	0	0	0.259259	0	0	0	0.333333	0.210526	0.214286	0	0
chr1	2359409	0.924528	0	0	0	0.375	0.344828	0	0	0	0	0	0.214286	0	0
chr1	2367059	0.978723	0	0.375	0	0	0	0	0	0	0	0	0	0	0
chr1	2367068	0.976744	0	0.25	0	0	0	0	0	0	0	0	0	0	1
chr1	2367075	0.976744	0	0	0	0	0	0	0	0	0	0	0	0	1
chr1	2367096	1	0	0	0	0	0	0	0	0	0	0	0	0	1
chr1	2369603	0.932432	0	0	0	0	0	0	0	0	0	0	0	0	0
chr1	2370337	0.96	0	0	0	0	0	0	0	0	0	0	0.15	0	0
chr1	2370365	0.946429	0	0	0	0	0	0.307692	0	0	0	0	0	0	0
chr1	2370404	0.960784	0	0	0	0	0	0	0	0	0	0	0	0	0
chr1	2371017	0.985714	0.25	0	0	0	0	0	0	0	0	0	0	0	0
chr1	2371023	0.942029	0	0	0	0	0	0	0	0	0	0	0	0	0
chr1	2371916	0.940379	0.416667	0.45	0.232558	0.52381	0.709677	0.166667	0	0.15	0	0	0	0	0
chr1	2371929	0.983784	0.75	0.444444	0.263158	0.380952	0.466667	0	0	0.131579	0	0	0	0	0
chr1	2371934	0.913889	0.333333	0.473684	0.297297	0.238095	0.366667	0.142857	0	0.108108	0	0	0	0	0
chr1	2371938	0.977465	0.3	0.470588	0.3	0.315789	0.466667	0.137931	0	0.131579	0	0	0	0	0
chr1	2371957	0.954839	0	0.5	0.243902	0.235294	0.451613	0.214286	0	0.170732	0	0	0	0	0
chr1	2371985	0.977974	0.375	0.411765	0.307692	0.222222	0.666667	0.5	0	0.235294	0.272727	0	0.157895	0	0
chr1	2374373	0.5	0	0	0	0	0	0	0	0	0	0	0	0	0
chr1	2374384	0.264706	0	0	0	0	0	0	0	0	0	0	0	0	0
chr1	2375802	0	0	0	0	0	0	0	0	0	0	0	0	0.4	0
chr1	2375813	0	0	0	0	0	0.2	0	0	0	0	0.285714	0	0	0
chr1	2376581	1	0.4	0	0	0	0.25	0	0	0	0	0	0	0.2	0
chr1	2376751	0.827586	0	0	0	0	0	0	0	0	0	0	0	0	0
chr1	2376759	0.964286	0	0	0	0	0	0	0	0	0	0	0	0	0
chr1	2377211	0.964912	0	0	0	0	0	0.142857	0	0	0	0	0.181818	0	0
chr1	2377220	0.982456	0	0	0	0	0	0	0	0	0	0	0.142857	0	0
chr1	2377228	0.932203	0	0	0	0.25	0.166667	0	0	0	0	0	0.166667	0	0
chr1	2377235	0.968254	0	0	0	0	0.2	0	0	0	0	0	0	0	0
chr1	2377258	0.928571	0	0	0	0	0	0	0	0	0	0	0	0	0
chr1	2380518	0.95	0	0.4	0	0	0	0	0	0	0	0	0.416667	0	0
chr1	2383650	0.953488	0	0	0	0	0	0	0	0	0	0	0	0	0
chr1	2383654	0.95122	0	0.285714	0	0	0	0.15	0	0	0	0	0	0	0
chr1	2383687	0.947368	0	0	0	0	0	0	0	0	0	0	0	0	1
chr1	2389681	1	0	0	0	0	0	0	0	0	0	0	0	0	0
chr1	2389723	0.903226	0	0	0	0	0	0	0	0	0	0	0	0	0
chr1	2392731	0.930556	0	0.333333	0	0	0	0	0	0	0	0	0	0	0
chr1	2392753	0.934426	0	0	0	0	0	0	0	0	0	0	0	0	0
chr1	2394687	0.979592	0	0	0	0	0	0	0	0	0	0	0	0	1
chr1	2400858	0.934783	0.4	0	0	0	0	0	0	0	0	0	0	0.25	1
chr1	2400872	1	0.4	0	0	0	0.333333	0	0	0	0	0	0	0	0
chr1	2401273	0.866667	0	0	0	0	0	0	0	0	0	0	0.16	0	1
chr1	2401349	0.977778	0	0	0	0	0	0	0	0	0	0	0	0	0
chr1	2401371	0.934783	0	0	0	0	0	0	0	0	0	0	0	0	0
chr1	2402739	1	0	0	0	0	0	0.1875	0	0	0	0	0.1875	0	0
chr1	2404167	0.946429	0	0	0	0	0	0	0	0	0.105263	0	0	0	0
chr1	2406621	0.967742	0	0	0	0	0	0	0	0	0	0	0	0	0
chr1	2410597	0.980769	0.833333	0.571429	0.5	0.357143	0.16	0.142857	0	0	0	0	0	0	1
chr1	2410678	0.957746	1	0.285714	0.666667	0	0	0	0	0	0	0	0	0	0
chr1	2410697	0.970149	0.833333	0.333333	0.333333	0.333333	0	0	0	0	0	0	0	0	1
chr1	2410709	0.983607	1	0.375	0.428571	0.333333	0	0	0	0	0	0.2	0	0	0
chr1	2410711	0.968254	1	0.375	0.571429	0.333333	0	0	0	0	0	0.1875	0	0	0
chr1	2410716	1	0.8	0.375	0.714286	0	0.263158	0.16	0	0.16	0.263158	0.25	0	0.25	1
chr1	2410752	0.96	1	0.285714	0	0	0	0	0	0	0	0	0	0	1
chr1	2410765	0.957447	1	0.285714	0.555556	0.3	0.130435	0	0	0	0	0	0	0	0
chr1	2410767	1	1	0	0.333333	0.4	0.173913	0	0	0	0	0.307692	0.136364	0	0
chr1	2410853	1	1	0.333333	0.4	0	0	0.3	0	0	0	0	0	0	0
chr1	2411366	0.982759	1	0.333333	0.625	0.4	0	0	0	0	0	0	0	0.4	0
chr1	2411375	0.981481	1	0.714286	0.555556	0	0.333333	0	0	0	0	0	0	0	0
chr1	2411378	0.963636	1	0.571429	0.5	0	0	0	0	0	0	0	0	0	1
chr1	2413120	0.941176	1	0.5	0	0	0	0	0	0	0	0	0	0	0
chr1	2413235	0.974359	1	0	0	0.272727	0	0	0	0	0	0	0	0	0
chr1	2413248	0.931818	1	0.25	0.285714	0	0	0	0	0	0	0	0	0	0
chr1	2415679	0.949153	1	0.4	0.285714	0.4	0.206897	0	0	0	0	0	0	0	0
chr1	2415962	0.962963	1	0	0.5	0.285714	0.166667	0	0	0	0	0	0	0	0
chr1	2415965	0.92	1	0.4	0.538462	0.25	0.222222	0	0	0	0	0	0	0	0
chr1	2416021	1	1	0	0.555556	0.5	0	0	0	0	0	0	0	0	1
chr1	2416297	0.913793	1	0.428571	0.615385	0.333333	0	0	0	0	0	0	0	0	0
chr1	2418091	0.983051	1	0.8	0.6	0.625	0	0	0	0	0	0	0	0	0
chr1	2418137	0.960526	1	0.8	0.666667	0	0.384615	0	0	0	0	0	0	0	1
chr1	2418181	1	1	0.333333	0.4	0.25	0	0	0	0	0	0	0.416667	0	0
chr1	2418190	0.97561	0.833333	0.333333	0.666667	0	0.266667	0.142857	0	0	0	0	0.454545	0	1
chr1	2418717	0.941176	1	0.5	0.466667	0.583333	0.25	0.210526	0	0	0.3125	0	0	0.285714	0
chr1	2419544	1	1	0.625	0.333333	0	0.535714	0.448276	0.363636	0.294118	0.222222	0.636364	0.285714	0	1
chr1	2419552	0.978723	1	0.375	0.428571	0	0.5	0.4	0.4	0.294118	0.210526	0.545455	0.230769	0	0
chr1	2419594	0.97619	1	0.444444	0	0.333333	0.409091	0.478261	0.25	0.421053	0	0	0.266667	0.625	0
chr1	2422366	0.915254	1	0.333333	0	0	0	0	0	0	0	0	0	0	1
chr1	2422376	0.983607	1	0.333333	0	0	0	0	0	0	0	0	0	0	0
chr1	2422409	0.984127	1	0.333333	0	0.3	0	0	0	0	0	0	0	0	1
chr1	2422443	0.971429	0.666667	0.285714	0.428571	0.454545	0	0	0	0	0	0	0	0	0
chr1	2422460	0.985915	1	0.5	0.375	0.545455	0.25	0	0	0	0	0	0	0	1
chr1	2422698	1	1	0	0.416667	0.363636	0	0	0	0	0	0	0	0	0
chr1	2423158	0.970149	1	0.4	0.421053	0	0.181818	0	0	0	0.2	0	0	0	0
chr1	2423167	0.984848	1	0.6	0.411765	0	0.192308	0	0	0	0	0	0	0	0
chr1	2423877	0.894737	0.666667	0.428571	0.666667	0.357143	0.157895	0	0	0	0.277778	0	0	0	0
chr1	2423918	0.965517	1	0.555556	0	0.285714	0	0	0	0	0	0	0.1875	0	0
chr1	2424003	1	1	0.428571	0.333333	0	0	0	0	0	0	0	0	0	1
chr1	2424957	0.970588	0.9	0.285714	0.6	0	0	0	0	0	0	0	0	0	0
chr1	2425083	0.895833	1	0	0	0	0	0	0	0	0	0	0	0	0
chr1	2425122	0.949153	1	0.333333	0	0	0.136364	0	0	0	0	0	0	0	0
chr1	2425126	0.932203	1	0	0.333333	0.25	0	0	0	0	0	0	0	0	0
chr1	2425167	0.984127	0.8	0.571429	0.454545	0.333333	0.291667	0	0	0	0	0.142857	0	0	0
chr1	2425171	0.984127	1	0	0.4	0	0	0	0	0	0	0	0.153846	0	0
chr1	2425173	0.984375	1	0.571429	0.555556	0.5	0.222222	0	0	0	0	0	0	0	0
chr1	2425176	0.967742	1	0	0.363636	0	0.142857	0	0	0	0	0	0	0	0
chr1	2425195	1	1	0.571429	0.307692	0	0.129032	0	0	0	0	0	0	0	0
chr1	2425244	0.975309	1	0.428571	0.4375	0.428571	0.206897	0	0	0	0	0	0.235294	0	0
chr1	2425255	0.943182	1	0.571429	0.5625	0.25	0	0	0	0	0	0	0.210526	0	1
chr1	2425273	0.9875	0.888889	0.285714	0.3125	0.375	0.190476	0	0	0	0	0	0	0	0
chr1	2425283	0.974026	1	0.333333	0.571429	0.444444	0.227273	0	0	0	0	0	0	0	0
chr1	2425286	0.961538	1	0.4	0.466667	0	0	0	0	0	0	0	0	0	0
chr1	2425373	0.987654	1	0.571429	0.571429	0.333333	0	0	0	0	0	0	0	0	0
chr1	2425413	0.95	1	0.375	0	0	0	0	0	0	0	0	0	0	1
chr1	2425450	0.953846	1	0	0.428571	0.428571	0	0	0	0	0	0	0	0	0
chr1	2425706	0.943396	0.875	0.8	0	0.444444	0	0	0	0	0	0	0	0	1
chr1	2425709	0.96	1	0.6	0	0.3125	0.1875	0	0	0	0	0	0.2	0	0
chr1	2428675	0.948718	1	0.333333	0.454545	0	0.368421	0	0	0.181818	0	0	0	0	0
chr1	2428719	0.940299	1	0.5	0	0	0.238095	0	0	0	0	0	0	0	0
chr1	2428731	0.984127	1	0.6	0.384615	0	0.363636	0	0	0.15	0	0	0	0	1
chr1	2428740	0.942857	1	0.4	0	0	0.2	0	0	0	0	0	0	0	0
chr1	2428967	0.967213	1	0.428571	0.3	0	0.206897	0	0	0	0	0	0.166667	0	0
chr1	2429193	0.878788	0.4	0	0	0	0	0	0	0	0	0	0	0	1
chr1	2429243	1	0.5	0.375	0	0.214286	0	0	0	0	0	0	0	0	1
chr1	2429266	0.925	0.571429	0.5	0	0.307692	0	0	0	0	0	0	0	0	0
chr1	2432025	0.844828	1	0.428571	0.692308	0	0.375	0	0	0	0.25	0	0.285714	0	0
chr1	2432030	0.983871	1	0.6	0.666667	0.454545	0	0	0	0	0	0	0	0	0
chr1	2432033	0.984127	1	0.6	0.666667	0.454545	0.285714	0	0	0	0	0	0	0.6	0
chr1	2432052	0.968254	1	0.6	0.454545	0.333333	0	0	0	0	0	0	0	0	0
chr1	2433038	0.955556	0.833333	0.4	0.416667	0.25	0.272727	0	0	0	0	0	0	0	1
chr1	2433043	0.866667	1	0.4	0.416667	0.25	0.173913	0	0	0	0	0	0.230769	0	1
chr1	2436249	0.95	0.6	0	0	0	0	0	0	0	0	0	0	0	0
chr1	2438685	1	0	0	0	0	0.2	0.136364	0	0	0	0	0	0.25	1
chr1	2438698	0.975904	0	0	0	0	0.210526	0	0	0	0	0	0	0	0
chr1	2442373	0.836735	0.625	0	0	0.3	0	0	0	0	0	0	0	0	0
chr1	2442902	0.903846	1	0	0.428571	0	0	0	0	0	0	0	0	0	1
chr1	2445315	1	1	0.555556	0.25	0.235294	0	0	0	0	0	0	0.185185	0	1
chr1	2445356	0.972603	1	0.333333	0.666667	0.263158	0.2	0	0	0	0	0	0.166667	0	0
chr1	2445364	0.974026	1	0.333333	0.555556	0.352941	0	0	0	0	0.173913	0.136364	0.117647	0	0
chr1	2445382	1	0.833333	0.333333	0	0.357143	0	0	0	0	0	0	0.176471	0	0
chr1	2445384	0.971429	1	0.666667	0.5	0.428571	0.217391	0	0	0.142857	0	0.15	0.151515	0	0
chr1	2445393	0.985075	1	0.833333	0.571429	0.384615	0.2	0	0	0.25	0	0.142857	0.1875	0.285714	0
chr1	2445398	0.984615	1	0.5	0.375	0.384615	0.2	0	0	0	0	0	0	0	0
chr1	2449008	0.981481	1	0.571429	0.333333	0.5625	0.214286	0	0	0	0	0	0	0	0
chr1	2449017	0.959184	1	0.571429	0.666667	0.4	0.235294	0.15	0	0	0	0	0	0	0
chr1	2449029	0.9375	1	0.428571	0.666667	0.545455	0.333333	0.136364	0	0	0	0	0	0	0
chr1	2449042	0.977778	0.666667	0.428571	0.571429	0.583333	0.35	0.173913	0	0	0	0	0	0	0
chr1	2449058	1	0.666667	0.333333	0.5	0.416667	0.181818	0	0	0	0.176471	0	0.206897	0	0
chr1	2449074	0.977778	1	0	0.6	0.5	0.142857	0	0	0	0	0	0.225806	0	1
chr1	2449086	0.962963	1	0.333333	0.555556	0.363636	0	0	0	0	0	0	0.3	0	0
chr1	2450143	0.946667	1	0.5	0.6	0.333333	0.25	0.214286	0	0	0	0	0	0	0
chr1	2450626	0.939394	1	0.6	0.4	0.307692	0.147059	0.212121	0	0	0	0	0	0	0
chr1	2451424	1	1	0	0.7	0.571429	0	0.166667	0	0	0	0	0	0	0
chr1	2451448	0.933333	1	0	0	0.333333	0	0	0	0	0	0	0	0	0
chr1	2451481	0.866667	1	0.333333	0.454545	0.375	0	0	0	0	0	0	0	0.4	0
chr1	2451511	0.948276	0.333333	0.428571	0.25	0.428571	0	0	0	0	0	0	0	0	0
chr1	2451513	0.962963	1	0.428571	0.384615	0.333333	0	0	0	0	0	0	0	0	0
chr1	2451534	0.942308	1	0.285714	0.583333	0.428571	0	0	0	0	0	0	0	0	0
chr1	2451541	0.981481	1	0	0.5	0.285714	0	0	0	0	0	0	0	0	0
chr1	2451550	0.982143	1	0.25	0.25	0.25	0	0	0	0	0	0	0	0	1
chr1	2451606	0.97561	0.8	0.555556	0.583333	0.625	0.235294	0	0	0	0	0	0	0	0
chr1	2451621	0.980392	1	0.444444	0.583333	0.571429	0.15	0	0	0	0	0	0	0	0
chr1	2452658	0.96	0.875	0.444444	0.4	0.25	0	0	0	0	0	0	0	0	1
chr1	2452744	0.95	0.833333	0.5	0.666667	0.454545	0	0	0	0	0	0	0	0	0
chr1	2452796	1	0.857143	0.666667	0.5	0.666667	0.428571	0.333333	0	0	0	0	0	0	0
chr1	2452798	0.971429	0.857143	0.666667	0.4	0.777778	0.428571	0	0	0	0	0	0	0	0
chr1	2452801	0.942857	0.714286	0.875	0.5	0.666667	0.333333	0	0	0	0	0	0	0	0
chr1	2452815	0.945946	1	0.75	0.25	0.8	0	0	0	0	0	0	0	0	0
chr1	2452844	0.923077	0.833333	0.75	0.5	0.571429	0.227273	0	0	0	0	0	0	0	0
chr1	2452846	0.973684	0.857143	0.571429	0.3	0.444444	0.227273	0	0	0	0	0	0	0	1
chr1	2452864	0.921053	1	0.666667	0.363636	0.333333	0.217391	0	0	0	0	0	0	0	0
chr1	2452867	1	1	0.8	0.363636	0.714286	0.227273	0	0	0	0	0	0	0.1875	0
chr1	2452910	1	1	0.4	0.272727	0.555556	0	0	0	0	0	0	0	0	0
chr1	2453056	0.962963	0.666667	0.6	0.25	0	0	0	0	0	0	0	0	0	0
chr1	2454244	0.948718	1	0.4	0.625	0.692308	0.263158	0.106383	0	0	0	0	0	0	0
chr1	2456780	0	0.4	0	0	0	0	0	0	0	0	0.428571	0	0	0
chr1	2456805	0	0.833333	0	0	0	0	0	0	0	0	0	0	0	0
chr1	2456846	0	0.6	0	0	0	0	0	0	0	0	0	0	0	0
chr1	2456850	0	0.8	0	0	0	0	0	0	0	0	0	0	0	0
chr1	2456885	0	0.4	0	0	0	0	0	0	0	0	0	0	0	0
chr1	2458347	0	0	0	0	0	0	0	0	0	0	0	0	0	0
chr1	2458356	0	0	0	0	0	0	0	0	0	0	0	0	0	0
chr1	2458380	0	0	0	0	0	0	0	0	0	0	0	0	0	1
chr1	2458418	0	0	0	0	0	0	0	0	0	0	0	0	0	0
chr1	2458447	0.0806452	0	0	0	0	0	0	0	0	0	0	0	0	0
chr1	2458455	0.101695	0	0	0	0	0	0	0	0	0	0	0	0	0
chr1	2458466	0.12069	0	0	0	0	0	0	0	0	0	0	0	0	0
chr1	2458506	0.133333	0	0	0	0	0	0	0	0	0	0	0.181818	0	0
chr1	2459251	0.927273	0	0	0	0	0	0	0	0	0	0	0	0	1
chr1	2460836	0	0	0	0	0	0	0	0	0	0	0	0	0	0
chr1	2462901	0.978723	0	0	0	0	0.25	0	0	0	0	0	0	0	0
chr1	2463605	1	0.4	0	0	0	0	0	0	0	0	0.1875	0	0	0
chr1	2463636	0.962025	0.428571	0	0	0	0.157895	0	0	0	0	0	0	0.214286	0
chr1	2463703	0.945946	0.4	0	0	0	0.25	0	0	0	0	0	0	0	0
chr1	2466684	0.94	0	0	0	0	0	0	0	0	0	0	0	0	0
chr1	2467027	1	0	0	0	0	0	0	0	0	0	0	0.285714	0	0
chr1	2467041	0.979167	0	0	0	0	0	0	0	0	0	0	0.230769	0	1
chr1	2467046	0.938776	0	0	0	0	0	0	0	0	0	0	0	0	0
chr1	2467051	0.94	0	0	0.272727	0	0	0	0	0	0	0	0	0	1
chr1	2467096	0.982456	0	0.333333	0	0	0	0	0	0	0	0	0	0	0
chr1	2467100	0.946429	0	0.333333	0	0	0	0	0	0	0	0	0	0	0
chr1	2471417	0.955556	0	0	0.266667	0	0	0	0	0	0	0	0	0	0
chr1	2471421	0.977273	0	0.4	0.333333	0	0.363636	0	0	0	0	0	0	0	0
chr1	2471440	0.934783	0	0	0	0	0	0	0	0	0	0	0	0	0
chr1	2471448	0.933333	0	0	0	0	0	0	0	0	0	0	0	0	0
chr1	2475628	0.953125	0	0	0	0	0	0	0	0	0	0	0	0	1
chr1	2475912	0.949153	0.5	0	0.25	0	0	0	0	0	0	0	0	0	0
chr1	2475950	0.9	0.428571	0	0	0	0	0	0	0	0	0	0	0	0
chr1	2479229	0	0	0	0	0	0	0	0	0	0	0	0	0	1
chr1	2498569	1	0.4	0	0	0	0	0.333333	0	0	0	0	0	0	1
chr1	2499109	0.963636	0	0	0	0	0	0	0	0	0	0	0	0	0
chr1	2499137	0.980392	0	0	0	0	0	0	0	0	0	0	0	0	0
chr1	2499171	0.910714	0	0.285714	0	0	0	0	0	0	0	0	0	0	0
chr1	2499181	0.942308	0	0	0	0	0	0	0	0	0	0	0	0	0
chr1	2499323	0.980392	0	0	0	0	0	0	0	0	0	0	0	0	0
chr1	2499333	0.960784	0	0	0.333333	0	0.266667	0	0	0	0	0	0	0	1
chr1	2499344	1	0	0	0	0	0	0	0	0	0	0	0	0	0
chr1	2499357	1	0	0	0	0	0	0	0	0	0	0	0	0	0
chr1	2499361	0.973684	0	0	0	0	0.375	0	0	0	0	0.285714	0	0	1
chr1	2500563	0.952381	0	0	0	0	0	0	0	0	0	0	0	0	0
chr1	2500592	1	0.333333	0	0	0	0.148148	0	0	0	0	0	0	0	1
chr1	2500646	0.957143	0.5	0	0	0	0	0	0	0	0	0	0	0	0
chr1	2500662	0.945205	0.5	0	0	0	0	0	0	0	0	0	0	0	0
chr1	2500678	0.96	0.6	0	0.214286	0	0.189189	0.135135	0	0	0	0	0.151515	0	0
chr1	2501624	0.910256	0	0	0	0	0	0	0	0	0	0	0	0	0
chr1	2501771	0.925926	0	0.3	0	0	0	0	0	0	0	0	0	0	0
chr1	2501809	0.946667	0	0	0	0	0	0	0	0	0	0	0	0	0
chr1	2501839	0.948052	0	0	0	0	0	0	0	0	0	0	0	0	0
chr1	2509658	0.914894	0	0	0	0	0	0	0	0	0	0	0	0	0
chr1	2509697	0.914894	0	0	0	0	0	0	0	0	0	0	0	0	0
chr1	2511061	1	0	0	0	0	0	0	0	0	0	0	0	0	1
chr1	2511257	0.93617	0.6	0	0	0	0	0	0	0	0	0	0	0	1
chr1	2511267	1	0.6	0	0	0.266667	0	0	0	0	0	0	0.272727	0	0
chr1	2511272	0.933333	0.6	0	0	0.294118	0.363636	0	0	0	0	0	0	0	0
chr1	2512285	1	0	0	0	0	0.227273	0	0	0	0	0	0.142857	0	0
chr1	2512289	0.909091	0	0	0	0.230769	0.35	0.178571	0	0	0	0	0.206897	0	0
chr1	2513105	1	0	0	0	0	0	0	0	0	0	0	0	0	0
chr1	2513127	1	0	0	0	0	0.3	0	0	0	0	0.375	0	0	0
chr1	2513199	0.777778	0	0	0	0	0	0.3	0	0	0	0	0	0.285714	0
chr1	2516583	0	0.6	0	0	0	0	0	0	0	0	0	0	0	1
chr1	2516591	0	0.6	0	0	0	0	0	0	0	0	0	0	0	1
chr1	2520659	0.9375	1	0.333333	0.4	0.25	0	0.307692	0	0	0	0	0	0	0
chr1	2523418	1	0.4	0.7	0.5	0.333333	0.875	0.47619	1	0.458333	0.9	0.7	0.823529	0	0
chr1	2524772	0.981132	0	0	0	0	0	0.333333	0	0	0	0	0	0	0
chr1	2524781	1	0	0	0	0	0	0	0	0	0	0	0	0	1
chr1	2524872	0.979592	0	0	0	0	0	0	0	0	0	0	0	0	0
chr1	2524890	0.958333	0	0	0	0	0	0	0	0	0	0	0	0	0
chr1	2524907	0.86	0	0	0	0	0	0	0	0	0	0	0	0	0
chr1	2524966	0.62963	0	0	0	0	0	0	0	0	0	0	0	0	0
chr1	2535240	0.960784	0	0	0	0	0	0	0	0	0	0	0.5	0	1
chr1	2535895	0.689189	0	0.4	0	0	0	0	0	0	0	0	0	0	0
chr1	2535908	0.948718	0	0.4	0.272727	0	0.25	0	0	0	0	0	0.166667	0	0
chr1	2535920	0.972222	0	0	0	0	0	0	0	0	0	0	0	0	0
chr1	2537719	0.978723	0	0	0	0	0	0	0	0	0	0	0	0	1
chr1	2537774	0.981481	0	0	0.1875	0	0	0.294118	0	0	0	0	0	0	0
chr1	2537838	0.666667	0	0	0.230769	0	0	0	0	0	0	0	0	0	0
chr1	2537869	1	0	0.4	0	0	0	0.230769	0	0	0	0	0.375	0	1
chr1	2539124	0.967742	0.5	0	0	0	0	0.129032	0	0	0	0	0.142857	0	0
chr1	2539181	0.578947	0	0	0	0	0	0	0	0	0	0	0	0	0
chr1	2557122	1	0	0	0	0	0	0	0	0	0	0	0	0	0
chr1	2557191	0.606061	0	0	0	0	0.230769	0	0	0	0	0	0	0	0
chr1	2557490	0.928571	0	0.375	0.333333	0.272727	0.333333	0	0	0	0.222222	0	0.4	0.375	0
chr1	2559946	0	0	0	0	0	0	0	0	0	0	0	0	0	0
chr1	2559957	0	0	0	0	0.4	0	0	0	0	0	0	0	0	0
chr1	2561774	0.11811	0.375	0	0.333333	0	0.27451	0.163636	0	0	0.117647	0.269231	0.181818	0.238095	0
chr1	2561796	0.293233	0	0	0.571429	0	0.472727	0.413793	0	0.242424	0.117647	0.458333	0.157895	0.181818	0
chr1	2561824	0.160305	0	0	0	0	0.272727	0.207547	0	0	0	0	0	0	0
chr1	2561836	0.0909091	0	0	0	0	0.127273	0.117647	0	0	0	0	0	0	0
chr1	2562385	0.169014	0.4	0	0.333333	0	0.305556	0.365385	0.176471	0	0	0	0.138889	0	0
chr1	2562393	0.268293	0.8	0	0	0	0.390244	0.5	0.222222	0	0	0	0.117647	0.5	0
chr1	2562399	0.581731	0.8	0.6	0	0	0.487179	0.627451	0.176471	0.235294	0	0.227273	0.2	0.333333	0
chr1	2562413	0.196078	0.4	0	0	0	0	0.275	0	0	0	0	0	0	1
chr1	2562441	0.706468	0.5	0.333333	0	0	0.354839	0.425	0.3125	0.243243	0.310345	0	0.194444	0.428571	0
chr1	2562447	0.826733	0.6	0.666667	0.333333	0.272727	0.806452	0.794872	0.75	0.567568	0.448276	0.3125	0.727273	0.875	0
chr1	2562495	0.444444	0.333333	0	0	0.230769	0.357143	0.37931	0	0.178571	0	0.2	0.193548	0.285714	0
chr1	2562655	0.4375	0	0	0	0	0	0.25	0	0	0	0.272727	0	0	0
chr1	2562662	0.525	0	0	0	0	0	0.392857	0	0	0	0	0	0	0
chr1	2565239	1	0	0	0	0	0	0.266667	0	0	0	0	0	0	0
chr1	2569042	0.9375	0.8	1	0.25	0.444444	0.75	0.764706	0.7	0.458333	0.588235	0.294118	0.461538	0.6	0
chr1	2569052	0.961538	0.6	0.8	0.230769	0.4	0.666667	0.705882	0.5	0.45	0.642857	0.428571	0.48	0.285714	0
chr1	2571448	0.956522	0	0.285714	0	0	0	0	0	0	0	0	0.157895	0	1
chr1	2571467	0.978723	1	0.428571	0	0	0	0.190476	0.4	0	0	0	0	0	0
chr1	2572242	0.777778	1	0	0	0	0	0	0	0	0	0	0	0	0
chr1	2573225	0.672414	1	0	0.25	0	0.285714	0	0	0	0	0	0	0	0
chr1	2583740	0.632911	0.692308	0.4	0.333333	0	0.166667	0.140351	0	0.225806	0	0.333333	0	0.4	0
chr1	2583798	0.808219	1	0	0	0.333333	0	0	0	0	0	0	0	0	0
chr1	2583899	0.8	1	0.25	0.25	0	0.4	0.46875	0.6	0.434783	0	0	0.5	1	0
chr1	2584051	0.653846	0.625	0.666667	0.25	0	0	0	0	0	0	0	0	0	0
chr1	2584059	0.791045	0.625	0.666667	0.235294	0	0.285714	0.241379	0	0.192308	0	0.208333	0.157895	0.2	0
chr1	2584105	0.453333	0	0.428571	0.238095	0.142857	0	0	0	0	0	0.357143	0	0	0
chr1	2584221	0.633508	0.785714	0.4	0.423077	0.15625	0.307692	0.142857	0.25	0.1875	0.363636	0.210526	0.322581	0.190476	0
chr1	2584253	0.565854	1	0.333333	0.259259	0.15625	0	0	0	0	0	0	0	0	0
chr1	2584340	0.712121	0.888889	0.4	0.419355	0.166667	0.5	0.517241	0.526316	0.48	0.272727	0.833333	0.411765	0.482759	0
chr1	2584357	0.501901	1	0.454545	0.354839	0.147059	0.272727	0.140351	0.176471	0.166667	0.363636	0.333333	0.153846	0.192308	0
chr1	2584373	0.487544	0.909091	0.375	0.241379	0	0	0	0	0	0	0	0	0	0
chr1	2584427	0.549618	0.769231	0.409091	0.344828	0.155556	0.166667	0	0	0	0	0.230769	0.1875	0.178571	0
chr1	2584493	0.46696	1	0.478261	0.171429	0.125	0	0	0	0	0	0	0	0	0
chr1	2584505	0.554622	0.636364	0.35	0.297297	0.184211	0	0.268293	0.2	0.15	0	0.26087	0.15	0	0
chr1	2584509	0.64557	0.636364	0.52381	0.305556	0.138889	0	0.236842	0.2	0	0	0.208333	0.181818	0.166667	0
chr1	2584541	0.775281	1	0.307692	0.289474	0.324324	0.230769	0.393939	0.384615	0.466667	0	0.565217	0.347826	0.642857	0
chr1	2584575	0.556738	0.75	0.461538	0.333333	0.25	0.241379	0.12069	0	0	0	0	0.16129	0.178571	0
chr1	2584814	0.373737	1	0.5	0.210526	0	0	0	0	0	0	0	0	0	0
chr1	2584901	0.575472	1	0.615385	0.233333	0.24	0	0.282609	0.3	0	0	0.409091	0	0	0
chr1	2584935	0.471154	1	0.642857	0.162162	0	0	0	0	0	0	0	0	0	0
chr1	2584986	0.614973	0.909091	0.454545	0.227273	0.2	0	0	0	0	0	0	0	0	0
chr1	2585009	0.451977	1	0.636364	0.32	0.307692	0	0	0	0	0	0	0	0	0
chr1	2585029	0.51634	1	0.375	0.210526	0.3	0	0.0909091	0	0	0	0	0	0	0
chr1	2585096	0.527638	0.666667	0	0.333333	0	0	0	0	0	0	0	0	0	0
chr1	2585183	0.753582	1	0.4	0.5	0.310345	0.56	0.545455	0.608696	0.55	0.333333	0.678571	0.622222	0.684211	0
chr1	2585200	0.425532	0.689655	0.533333	0.473684	0.3125	0	0.176471	0.227273	0.179487	0	0.44	0.179487	0.2	0
chr1	2585216	0.238961	0.875	0	0.394737	0.166667	0	0	0	0	0	0	0	0	0
chr1	2585344	0.620301	0.916667	0.277778	0.225	0.153846	0.232558	0.325843	0.285714	0.219512	0.28	0.55814	0.322581	0.71875	0
chr1	2585423	0.803279	0.909091	0.428571	0.26087	0.225	0.569231	0.697248	0.592593	0.588235	0.372093	0.679245	0.701493	0.840909	0
chr1	2585456	0.377301	0.75	0.380952	0.265306	0	0	0	0	0	0	0	0	0	0
chr1	2585510	0.344	0.7	0.368421	0.258621	0.170732	0	0.105263	0	0.111111	0	0.128205	0.0943396	0	0
chr1	2585576	0.241463	0.928571	0.333333	0.388889	0.2	0	0	0	0	0	0	0	0	0
chr1	2585588	0.337017	0.916667	0.208333	0.472727	0.292683	0.209677	0.217391	0.2	0.15942	0	0.285714	0.175439	0.142857	0
chr1	2585592	0.38342	0.909091	0.26087	0.396552	0.3	0.245902	0.267857	0.142857	0.15942	0	0.361111	0.233333	0.20339	0
chr1	2585616	0.356322	0.875	0.24	0.487805	0.136364	0.116279	0	0	0	0	0	0	0	0
chr1	2585624	0.59697	0.75	0.36	0.368421	0.209302	0.428571	0.428571	0.277778	0.35	0	0.451613	0.314286	0.363636	0
chr1	2585769	0.633663	0.8	0.36	0.411765	0.333333	0	0	0	0	0	0	0	0	0
chr1	2585858	0.440816	0.714286	0.333333	0.323529	0.131579	0	0	0	0	0	0	0	0	0
chr1	2585890	0.541485	0.5	0.363636	0.40625	0.190476	0	0	0	0	0	0	0	0	0
chr1	2585909	0.519481	0.666667	0.375	0.30303	0.295455	0	0.117647	0	0	0	0	0	0	0
chr1	2585941	0.303797	0.8	0.428571	0.394737	0.369565	0	0.102564	0	0	0	0.222222	0.181818	0	0
chr1	2585979	0.345291	0.8	0.368421	0.222222	0.225	0	0	0	0	0	0	0	0	0
chr1	2585990	0.49115	0.833333	0.363636	0.361111	0.309524	0	0	0	0	0	0	0	0	0
chr1	2586000	0.633484	1	0.375	0.277778	0.384615	0.181818	0.140845	0.2	0.181818	0	0.142857	0	0.129032	0
chr1	2586027	0.60396	1	0.272727	0.194444	0.157895	0.30303	0.228571	0.176471	0.238095	0.176471	0.5	0.263158	0.486486	0
[truncated: 559,801+ more rows]
